# Supplementary material for: Theoretical study for evaluating and discovering organic hydride compounds as novel trifluoromethylation reagents
Source: Royal Society of Chemistry journal article supplement (doi:10.1039/d2ob00056c), 2022-01-01

*Supporting Information for*

**Theoretical Study for Evaluating and Discovering Organic Hydride  
Compounds as Novel Trifluoromethylation Reagents**

Guang-Bin Shen,<sup>1</sup> Hao-Yun Yu,<sup>1</sup> Zhihao Xu,<sup>2</sup> Weilong Cao,<sup>2</sup> Jie Liu,<sup>1</sup> Li Xie,<sup>1</sup> and Maocai Yan<sup>2,\*</sup>

<sup>1</sup>School of Medical Engineering, Jining Medical University, Jining, Shandong, 272000, P. R. China

<sup>2</sup>School of Pharmacy, Jining Medical University, Rizhao, Shandong, 276800, P. R. China

\*Corresponding Author: Maocai Yan, maocaiyan@mail.jnmc.edu.cn

---

**Contents**

|                                                  |     |
|--------------------------------------------------|-----|
| Table S1 .....                                   | S2  |
| Coordinate of Reactants .....                    | S4  |
| Coordinate of Transition States .....            | S30 |
| Coordinate of Products .....                     | S56 |
| Electron spin density of transition states ..... | S79 |

**Table S1.** The differences on Gibbs free energies ( $\Delta\Delta G^\circ$ ), enthalpy changes ( $\Delta\Delta H^\circ$ ), entropy changes ( $\Delta\Delta S^\circ$ ), activation free energies ( $\Delta\Delta G^\ddagger$ ), activation enthalpy changes ( $\Delta\Delta H^\ddagger$ ), and activation entropy changes ( $\Delta\Delta S^\ddagger$ ) of  $\text{XH}^{+\cdot}$  releasing  $\text{CF}_3^\cdot$  in acetonitrile between 298.15K and 355 K.

| XH  | $\Delta\Delta G^\circ$ | $\Delta\Delta H^\circ$ | $\Delta\Delta S^\circ$ | $\Delta\Delta G^\ddagger$ | $\Delta\Delta H^\ddagger$ | $\Delta\Delta S^\ddagger$ |
|-----|------------------------|------------------------|------------------------|---------------------------|---------------------------|---------------------------|
| 1H  | -2.71                  | -0.17                  | 9.35                   | -0.28                     | -0.06                     | -0.17                     |
| 2H  | -2.55                  | -0.16                  | 16.66                  | -0.23                     | -0.05                     | -0.15                     |
| 3H  | -2.46                  | -0.18                  | 7.99                   | 0.00                      | -0.06                     | -0.19                     |
| 4H  | -2.59                  | -0.18                  | 10.8                   | -0.10                     | -0.07                     | -0.22                     |
| 5H  | -2.47                  | -0.16                  | 9.96                   | -0.17                     | -0.05                     | -0.16                     |
| 6H  | -2.38                  | -0.17                  | 11.04                  | -0.09                     | -0.06                     | -0.18                     |
| 7H  | -2.48                  | -0.15                  | 9.45                   | -0.19                     | -0.03                     | -0.08                     |
| 8H  | -2.45                  | -0.16                  | 16.36                  | -0.14                     | -0.05                     | -0.12                     |
| 9H  | -2.55                  | -0.16                  | 8.81                   | -0.24                     | -0.04                     | -0.1                      |
| 10H | -2.40                  | -0.17                  | 13.54                  | -0.12                     | -0.05                     | -0.12                     |
| 11H | -2.44                  | -0.15                  | 14.35                  | -0.20                     | -0.04                     | -0.11                     |
| 12H | -2.44                  | -0.17                  | 12.68                  | -0.19                     | -0.05                     | -0.14                     |
| 13H | -2.48                  | -0.16                  | 13.36                  | -0.08                     | -0.04                     | -0.13                     |
| 14H | -2.50                  | -0.15                  | 12.72                  | -0.17                     | -0.04                     | -0.13                     |
| 15H | -2.40                  | -0.18                  | 13.95                  | -0.24                     | -0.05                     | -0.14                     |
| 16H | -2.45                  | -0.15                  | 8.86                   | -0.34                     | -0.03                     | -0.07                     |
| 17H | -2.56                  | -0.14                  | 10.75                  | -0.20                     | -0.04                     | -0.11                     |
| 18H | -2.57                  | -0.13                  | 10.00                  | -0.37                     | -0.03                     | -0.08                     |
| 19H | -2.50                  | -0.14                  | 9.45                   | -0.33                     | -0.03                     | -0.08                     |
| 20H | -2.43                  | -0.14                  | 9.62                   | -0.28                     | -0.03                     | -0.08                     |
| 21H | -2.48                  | -0.12                  | 4.28                   | -0.38                     | 0.00                      | -0.01                     |
| 22H | -2.61                  | -0.11                  | 2.80                   | -0.59                     | 0.01                      | 0.01                      |
| 23H | -2.50                  | -0.15                  | 9.71                   | -0.24                     | -0.04                     | -0.12                     |
| 24H | -2.45                  | -0.14                  | 6.82                   | -0.20                     | -0.04                     | -0.12                     |
| 25H | -2.35                  | -0.14                  | 10.58                  | -0.13                     | -0.02                     | -0.08                     |
| 26H | -2.40                  | -0.14                  | 11.25                  | -0.29                     | -0.02                     | -0.03                     |
| 27H | -2.54                  | -0.12                  | 10.26                  | -0.30                     | 0.00                      | 0.00                      |
| 28H | -2.40                  | -0.13                  | 11.46                  | -0.22                     | -0.02                     | -0.06                     |
| 29H | -2.42                  | -0.13                  | 10.79                  | -0.13                     | -0.02                     | -0.06                     |
| 30H | -2.48                  | -0.13                  | 10.07                  | -0.31                     | -0.01                     | -0.02                     |
| 31H | -2.37                  | -0.15                  | 9.87                   | -0.15                     | -0.03                     | -0.08                     |
| 32H | -2.44                  | -0.14                  | 2.17                   | -0.35                     | -0.02                     | -0.04                     |
| 33H | -2.36                  | -0.15                  | 11.41                  | -0.23                     | -0.01                     | -0.02                     |
| 34H | -2.32                  | -0.19                  | 17.84                  | -0.23                     | -0.05                     | -0.16                     |
| 35H | -2.50                  | -0.13                  | 15.88                  | -0.27                     | -0.01                     | -0.04                     |
| 36H | -2.27                  | -0.20                  | 17.72                  | -0.17                     | -0.05                     | -0.14                     |
| 37H | -2.35                  | -0.15                  | 10.12                  | -0.25                     | -0.02                     | -0.09                     |
| 38H | -2.43                  | -0.12                  | 10.70                  | -0.36                     | -0.01                     | -0.01                     |

|     |       |       |       |       |       |       |
|-----|-------|-------|-------|-------|-------|-------|
| 39H | -2.38 | -0.16 | 10.66 | -0.22 | -0.04 | -0.12 |
| 40H | -2.41 | -0.14 | 10.56 | -0.28 | -0.01 | -0.04 |
| 41H | -2.38 | -0.18 | 26.36 | -0.13 | -0.05 | -0.16 |
| 42H | -2.30 | -0.17 | 23.08 | 0.05  | -0.05 | -0.15 |
| 43H | -2.38 | -0.15 | 14.77 | -0.08 | -0.04 | -0.13 |
| 44H | -2.45 | -0.15 | 14.29 | -0.20 | -0.03 | -0.09 |
| 45H | -2.27 | -0.16 | 14.72 | 0.12  | -0.05 | -0.13 |
| 46H | -2.44 | -0.17 | 7.62  | -0.35 | -0.06 | -0.19 |
| 47H | -2.51 | -0.12 | 8.02  | -0.46 | -0.01 | -0.04 |

Note:  $\Delta\Delta G^o = \Delta G^o_{RD}(XH^{*+}) - \Delta G^o_{RD}(XH^{*+})$ ;  $\Delta\Delta H^o = \Delta H^o_{RD}(XH^{*+}) - \Delta H^o_{RD}(XH^{*+})$ ;  $\Delta\Delta S^o = \Delta S^o_{RD}(XH^{*+}) - \Delta S^o_{RD}(XH^{*+})$ ;  $\Delta\Delta G^{\neq} = \Delta G^{\neq}_{RD}(XH^{*+}) - \Delta G^{\neq}_{RD}(XH^{*+})$ ;  $\Delta\Delta H^{\neq} = \Delta H^{\neq}_{RD}(XH^{*+}) - \Delta H^{\neq}_{RD}(XH^{*+})$ ;  $\Delta\Delta S^{\neq} = \Delta S^{\neq}_{RD}(XH^{*+}) - \Delta S^{\neq}_{RD}(XH^{*+})$ . The units of  $\Delta\Delta G^o$ ,  $\Delta\Delta H^o$ ,  $\Delta\Delta G^{\neq}$  and  $\Delta\Delta H^{\neq}$  are kcal/mol, and the units of  $\Delta\Delta S^o$  and  $\Delta\Delta S^{\neq}$  are cal mol<sup>-1</sup> K<sup>-1</sup>.

## Coordinate of Reactants

1H (Charge = 1, Multiplicity = 2):

|   |             |             |             |
|---|-------------|-------------|-------------|
| C | -2.05906300 | 0.70323700  | 0.45220600  |
| C | -2.68051200 | 1.72790400  | -0.22486600 |
| N | -3.85350200 | 1.43272200  | -0.85432900 |
| C | -4.53897100 | 0.25305200  | -0.84954400 |
| C | -3.94902600 | -0.81027900 | -0.20820000 |
| C | -2.61341900 | -0.68063000 | 0.43946300  |
| C | -2.22481100 | 3.14959700  | -0.34016800 |
| C | -5.86689500 | 0.27363000  | -1.54010300 |
| C | -4.57318900 | -2.15682100 | -0.04043300 |
| O | -4.11132900 | -2.96089400 | 0.73975700  |
| O | -5.62499300 | -2.36515400 | -0.81330700 |
| C | -7.42076200 | -3.67896400 | -1.65126400 |
| C | -6.26549200 | -3.65849000 | -0.68086600 |
| C | -0.83485100 | 0.85208300  | 1.29426800  |
| O | -0.44535300 | -0.06363400 | 1.98622200  |
| O | -0.25543600 | 2.03680300  | 1.20692100  |
| C | 1.39563700  | 3.64395400  | 1.79376300  |
| C | 0.92903100  | 2.22701600  | 2.02000800  |
| C | -1.58631500 | -1.69321500 | -0.18722300 |
| F | -1.18081800 | -2.59184100 | 0.70369800  |
| F | -0.50066300 | -1.06784900 | -0.65866200 |
| F | -2.12042500 | -2.35917300 | -1.22002700 |
| H | -4.29877200 | 2.20560400  | -1.35190200 |
| H | -2.70433300 | -1.02353900 | 1.48289700  |
| H | -1.22892800 | 3.19038700  | -0.78308100 |
| H | -2.91892100 | 3.71949600  | -0.95945600 |
| H | -2.16904600 | 3.60589400  | 0.64995700  |
| H | -6.10479300 | 1.28709600  | -1.86459500 |
| H | -5.84993800 | -0.38972800 | -2.40678000 |
| H | -6.64680700 | -0.07918200 | -0.86405600 |
| H | -7.93324900 | -4.64118400 | -1.58009700 |
| H | -8.13657500 | -2.88646200 | -1.41913000 |
| H | -7.06712900 | -3.54895000 | -2.67703300 |
| H | -5.52367000 | -4.43030800 | -0.90093800 |
| H | -6.59099800 | -3.77319400 | 0.35625100  |
| H | 2.29244300  | 3.82694700  | 2.39027000  |
| H | 1.63914500  | 3.80879400  | 0.74127200  |
| H | 0.62590300  | 4.35824600  | 2.09645400  |
| H | 0.66153100  | 2.03877100  | 3.06278000  |
| H | 1.67458100  | 1.48920800  | 1.71268900  |

2H (Charge = 1, Multiplicity = 2):

|   |             |             |             |
|---|-------------|-------------|-------------|
| C | -3.80387200 | 0.36536500  | 0.86833900  |
| C | -4.36861300 | 1.40153800  | 0.15236100  |
| N | -5.47465100 | 1.12904600  | -0.58534200 |
| C | -6.13960400 | -0.05566700 | -0.64670500 |
| C | -5.61375600 | -1.12229100 | 0.04845500  |
| C | -4.32939200 | -1.03273700 | 0.80822500  |
| C | -3.84021500 | 2.79470500  | 0.15615200  |

|   |             |             |             |
|---|-------------|-------------|-------------|
| C | -7.40825000 | -0.10954800 | -1.42570500 |
| C | -6.33466000 | -2.35112200 | 0.04154200  |
| N | -6.93805100 | -3.33966000 | 0.03757800  |
| C | -2.67109700 | 0.65037600  | 1.68281700  |
| N | -1.75651600 | 0.89700700  | 2.34938000  |
| C | -3.27067400 | -1.97160200 | 0.17744800  |
| F | -2.15068800 | -1.96022600 | 0.89808700  |
| F | -2.97312800 | -1.58793000 | -1.06351300 |
| F | -3.72657400 | -3.22223400 | 0.13085300  |
| H | -5.87403500 | 1.90654600  | -1.11795300 |
| H | -4.47193400 | -1.42165900 | 1.83018800  |
| H | -2.83059300 | 2.80150100  | -0.26402500 |
| H | -4.47799800 | 3.45985300  | -0.42586000 |
| H | -3.78378400 | 3.16021200  | 1.18492500  |
| H | -7.55066100 | 0.80581900  | -2.00019800 |
| H | -7.39495300 | -0.96638600 | -2.10285600 |
| H | -8.24772200 | -0.23090100 | -0.73419200 |

3H (Charge = 1, Multiplicity = 2):

|   |             |             |             |
|---|-------------|-------------|-------------|
| C | -3.77641800 | 0.60467000  | 0.65785200  |
| C | -4.40036800 | 1.61934900  | -0.02799000 |
| N | -5.56807900 | 1.32133900  | -0.67104900 |
| C | -6.23495800 | 0.13319900  | -0.69615800 |
| C | -5.65963300 | -0.93030300 | -0.04143900 |
| C | -4.36065800 | -0.76967800 | 0.67344800  |
| C | -3.96590300 | 3.04996100  | -0.12511200 |
| C | -7.54805900 | 0.14552800  | -1.41612500 |
| C | -6.27679600 | -2.29600300 | 0.11480200  |
| O | -5.95845000 | -2.92408200 | 1.10701300  |
| C | -7.17127500 | -2.87115000 | -0.94334400 |
| C | -2.55091300 | 0.74943000  | 1.52232800  |
| O | -2.40105500 | -0.09240600 | 2.38891900  |
| C | -1.53836000 | 1.83156200  | 1.28915400  |
| C | -3.32009800 | -1.83187800 | 0.18331300  |
| F | -2.99471600 | -2.68453300 | 1.15151900  |
| F | -2.18842600 | -1.25874200 | -0.24797600 |
| F | -3.79555600 | -2.55373000 | -0.84303400 |
| H | -6.01714800 | 2.09573600  | -1.16226900 |
| H | -4.53054200 | -1.04712100 | 1.72818900  |
| H | -3.01458200 | 3.12772100  | -0.65445600 |
| H | -4.70959400 | 3.63672300  | -0.66591600 |
| H | -3.84851900 | 3.47820300  | 0.87192100  |
| H | -7.81318300 | 1.16584600  | -1.69594600 |
| H | -7.49468300 | -0.46042700 | -2.32319000 |
| H | -8.33670200 | -0.25138400 | -0.77467100 |
| H | -7.21193300 | -3.95107500 | -0.79931700 |
| H | -8.18253800 | -2.46521900 | -0.85106300 |
| H | -6.79577700 | -2.63521700 | -1.94215500 |
| H | -0.63233900 | 1.56378600  | 1.83310000  |
| H | -1.32029000 | 1.94006700  | 0.22378800  |
| H | -1.90611200 | 2.79041300  | 1.66473800  |

4H (Charge = 1, Multiplicity = 2):

|   |             |             |             |
|---|-------------|-------------|-------------|
| C | -3.74424200 | 0.49395000  | 0.61298700  |
| C | -4.30222200 | 1.48508300  | -0.15865100 |
| N | -5.39647900 | 1.15139400  | -0.90351800 |
| C | -6.11170900 | -0.01231400 | -0.85656200 |
| C | -5.59309900 | -1.03525300 | -0.10182600 |
| C | -4.21543800 | -0.91644100 | 0.46536700  |
| C | -3.84287300 | 2.90486700  | -0.28850700 |
| C | -7.38069600 | -0.01753400 | -1.65215400 |
| C | -6.23603900 | -2.37322600 | 0.14026200  |
| O | -5.50782100 | -3.33449300 | 0.35339600  |
| N | -7.57970700 | -2.43290600 | 0.13494800  |
| C | -2.58166100 | 0.64903300  | 1.55462100  |
| O | -1.88126700 | -0.33180900 | 1.77216100  |
| N | -2.39113100 | 1.85136300  | 2.12645500  |
| C | -3.19837700 | -1.71928900 | -0.44181300 |
| F | -2.63429800 | -2.71606200 | 0.23029900  |
| F | -2.21963500 | -0.93182200 | -0.90598800 |
| F | -3.79777300 | -2.23947100 | -1.52004400 |
| H | -5.77184000 | 1.88599100  | -1.50624800 |
| H | -4.16438600 | -1.42883300 | 1.43148500  |
| H | -2.76355200 | 2.97744200  | -0.16247000 |
| H | -4.11000900 | 3.29124500  | -1.27477200 |
| H | -4.33312900 | 3.53072100  | 0.46456400  |
| H | -7.28624600 | 0.66458700  | -2.49996000 |
| H | -7.60168000 | -1.01623100 | -2.02594500 |
| H | -8.21697400 | 0.32558400  | -1.03414800 |
| H | -8.15818900 | -1.60551200 | 0.17216200  |
| H | -8.00774800 | -3.31639000 | 0.38204600  |
| H | -3.08958100 | 2.58058000  | 2.10130000  |
| H | -1.66280900 | 1.92329200  | 2.82594600  |

5H (Charge = 1, Multiplicity = 2):

|   |             |             |             |
|---|-------------|-------------|-------------|
| C | -2.01146600 | 0.89383100  | 0.33958400  |
| C | -2.67405700 | 1.91429800  | -0.27753600 |
| N | -3.84098900 | 1.66691500  | -0.91980700 |
| C | -4.44879800 | 0.45654100  | -0.95272700 |
| C | -3.85057500 | -0.61740300 | -0.36140200 |
| C | -2.51965500 | -0.50816100 | 0.30272100  |
| C | -4.52328600 | -1.94826000 | -0.29505300 |
| O | -4.05186400 | -2.86014800 | 0.34539000  |
| O | -5.64907600 | -1.98661600 | -0.98730200 |
| C | -7.61856000 | -3.06290000 | -1.78348400 |
| C | -6.37305300 | -3.24274500 | -0.95172600 |
| C | -0.77091700 | 1.13703800  | 1.13311400  |
| O | -0.26932900 | 0.26233800  | 1.80190000  |
| O | -0.32529300 | 2.37646700  | 1.01594200  |
| C | 1.21105400  | 4.13470000  | 1.48367900  |
| C | 0.87329400  | 2.69246000  | 1.76876500  |
| C | -1.47303000 | -1.47610800 | -0.35493900 |
| F | -1.05196600 | -2.39201600 | 0.51042600  |
| F | -0.40152300 | -0.80976200 | -0.79989000 |
| F | -1.99178000 | -2.11505200 | -1.40945400 |
| H | -2.32742400 | 2.93963700  | -0.27864100 |

|   |             |             |             |
|---|-------------|-------------|-------------|
| H | -4.31002400 | 2.45170300  | -1.37611700 |
| H | -5.40943300 | 0.40883300  | -1.44959200 |
| H | -2.61512800 | -0.87545600 | 1.33855100  |
| H | -8.19033800 | -3.99380500 | -1.77730400 |
| H | -8.24645100 | -2.26740100 | -1.37502600 |
| H | -7.36307500 | -2.81953800 | -2.81754200 |
| H | -5.71798400 | -4.02275300 | -1.34802000 |
| H | -6.60051200 | -3.47426100 | 0.09199100  |
| H | 2.11260400  | 4.40720800  | 2.03734500  |
| H | 1.39949200  | 4.28550300  | 0.41806500  |
| H | 0.39814900  | 4.79346000  | 1.79833000  |
| H | 0.66607000  | 2.51525900  | 2.82717000  |
| H | 1.66407400  | 2.00945900  | 1.44827600  |

6H (Charge = 1, Multiplicity = 2):

|   |             |             |             |
|---|-------------|-------------|-------------|
| C | -2.29856900 | 0.66807400  | 0.80831000  |
| C | -2.93105100 | 1.68698500  | 0.15148400  |
| N | -4.06628100 | 1.39368900  | -0.58675800 |
| C | -4.75056300 | 0.19369100  | -0.49236000 |
| C | -4.14839500 | -0.85333600 | 0.14934700  |
| C | -2.78784200 | -0.73256200 | 0.73257800  |
| C | -2.49904100 | 3.12062400  | 0.21763300  |
| C | -6.13545700 | 0.13756800  | -1.06300800 |
| C | -4.60734000 | 2.43500100  | -1.47503000 |
| C | -4.79548300 | -2.19365800 | 0.34051900  |
| O | -4.73356600 | -2.77809500 | 1.39680900  |
| O | -5.37112300 | -2.65109800 | -0.75920000 |
| C | -6.61148900 | -4.26418800 | -1.99317500 |
| C | -6.00669800 | -3.95022500 | -0.64709100 |
| C | -1.08697300 | 0.85406500  | 1.67402800  |
| O | -0.98234400 | 0.28591600  | 2.73606600  |
| O | -0.17117300 | 1.63770800  | 1.12876800  |
| C | 1.91985300  | 2.77440000  | 1.12573900  |
| C | 1.03442900  | 1.83819000  | 1.91035700  |
| C | -1.79884000 | -1.57476600 | -0.10467500 |
| F | -2.16444600 | -2.85923800 | -0.12222900 |
| F | -0.56385300 | -1.50052600 | 0.39866500  |
| F | -1.75158200 | -1.14545300 | -1.36777900 |
| H | -2.76935900 | -1.18697000 | 1.73545700  |
| H | -1.86917500 | 3.27710200  | 1.08977600  |
| H | -1.92493000 | 3.39406400  | -0.67311600 |
| H | -3.36675100 | 3.77778800  | 0.29053300  |
| H | -6.66382700 | 1.07291600  | -0.87343600 |
| H | -6.10487000 | -0.03783800 | -2.14278100 |
| H | -6.69231000 | -0.67479100 | -0.60230100 |
| H | -3.78532800 | 3.03816300  | -1.85067700 |
| H | -5.11055200 | 1.95787900  | -2.31147100 |
| H | -5.31186200 | 3.06306400  | -0.92179600 |
| H | -7.10084100 | -5.23994400 | -1.94848600 |
| H | -7.35743300 | -3.51402700 | -2.26737300 |
| H | -5.84043500 | -4.29751000 | -2.76655900 |
| H | -5.24370100 | -4.67589700 | -0.35398500 |
| H | -6.75925100 | -3.89615100 | 0.14365200  |

|   |            |            |            |
|---|------------|------------|------------|
| H | 2.84349700 | 2.94681600 | 1.68320600 |
| H | 2.17572200 | 2.34366100 | 0.15481000 |
| H | 1.42461600 | 3.73580800 | 0.96848700 |
| H | 0.74917000 | 2.25191500 | 2.88084300 |
| H | 1.49994500 | 0.86204000 | 2.07012200 |

7H (Charge = 1, Multiplicity = 2):

|   |             |             |             |
|---|-------------|-------------|-------------|
| C | -2.00469500 | 0.62087900  | 0.48450100  |
| C | -2.66335200 | 1.64279100  | -0.13890000 |
| N | -3.82900100 | 1.42469300  | -0.79492700 |
| C | -4.42499700 | 0.19120100  | -0.80839900 |
| C | -3.83605900 | -0.87801000 | -0.21838600 |
| C | -2.50610800 | -0.78174600 | 0.45002100  |
| C | -4.51279400 | 2.52640300  | -1.48310100 |
| C | -4.51738100 | -2.20487200 | -0.15144300 |
| O | -4.04847700 | -3.12125400 | 0.48477800  |
| O | -5.64844500 | -2.23807500 | -0.83648000 |
| C | -7.62941900 | -3.30521400 | -1.61580000 |
| C | -6.37774800 | -3.49033100 | -0.79436000 |
| C | -0.76755100 | 0.87080400  | 1.28100200  |
| O | -0.25974900 | -0.00316700 | 1.94630200  |
| O | -0.33026900 | 2.11435200  | 1.17150400  |
| C | 1.18683000  | 3.88404700  | 1.65576900  |
| C | 0.86389000  | 2.43593000  | 1.92835200  |
| C | -1.46187600 | -1.74414800 | -0.21299600 |
| F | -1.03728400 | -2.66366800 | 0.64781500  |
| F | -0.39058200 | -1.07635200 | -0.65850900 |
| F | -1.98158000 | -2.38049400 | -1.26910400 |
| H | -2.29580100 | 2.66129900  | -0.12794500 |
| H | -5.38767200 | 0.13640300  | -1.30279800 |
| H | -2.60152500 | -1.14997100 | 1.48421400  |
| H | -3.93506100 | 3.43849700  | -1.35655000 |
| H | -4.59631100 | 2.26731300  | -2.54021000 |
| H | -5.50808500 | 2.63671700  | -1.04914500 |
| H | -8.20566700 | -4.23333000 | -1.60447800 |
| H | -8.25006800 | -2.50651700 | -1.20249700 |
| H | -7.38158600 | -3.06340900 | -2.65209800 |
| H | -5.73016800 | -4.27411400 | -1.19552200 |
| H | -6.59808300 | -3.72078800 | 0.25113200  |
| H | 2.08478000  | 4.16166000  | 2.21272700  |
| H | 1.37477800  | 4.04577000  | 0.59165800  |
| H | 0.36648600  | 4.53141600  | 1.97483400  |
| H | 0.65745600  | 2.24774500  | 2.98501000  |
| H | 1.66223800  | 1.76404600  | 1.60312100  |

8H (Charge = 1, Multiplicity = 2):

|   |             |             |             |
|---|-------------|-------------|-------------|
| C | -4.91507500 | 0.86781700  | 0.61524600  |
| C | -5.50837800 | 1.91610600  | -0.03627200 |
| N | -6.63372900 | 1.70746400  | -0.75505800 |
| C | -7.26976100 | 0.51901200  | -0.85189200 |
| C | -6.74623300 | -0.58271500 | -0.22990300 |
| C | -5.45444300 | -0.52863700 | 0.52967200  |
| C | -7.47062200 | -1.81024500 | -0.29274400 |



|   |             |             |             |
|---|-------------|-------------|-------------|
| N | -8.06414000 | -2.80314200 | -0.33150100 |
| C | -3.75862200 | 1.12625600  | 1.40900900  |
| N | -2.82623200 | 1.33633600  | 2.06181000  |
| C | -4.40954200 | -1.47545800 | -0.11096000 |
| F | -3.29040800 | -1.48453700 | 0.60971700  |
| F | -4.10905300 | -1.08472400 | -1.34846100 |
| F | -4.88418400 | -2.71808500 | -0.16695400 |
| H | -5.13045300 | 2.93040700  | -0.00020600 |
| H | -7.05048400 | 2.51131600  | -1.23158000 |
| H | -8.19331800 | 0.50039100  | -1.41707200 |
| H | -5.60725500 | -0.92756100 | 1.54714600  |

9H (Charge = 1, Multiplicity = 2):

|   |             |             |             |
|---|-------------|-------------|-------------|
| C | -4.17090000 | 0.94988200  | 0.46191600  |
| C | -4.88474200 | 1.98465800  | -0.06445300 |
| N | -6.08633000 | 1.75157200  | -0.64939700 |
| C | -6.66861800 | 0.52881100  | -0.73299600 |
| C | -6.02900800 | -0.56528700 | -0.23169000 |
| C | -4.70736000 | -0.44204900 | 0.44896900  |
| C | -6.66558900 | -1.92729700 | -0.17435200 |
| O | -6.34469900 | -2.67323000 | 0.74151300  |
| N | -7.56000700 | -2.21786600 | -1.13073800 |
| C | -2.89009800 | 1.14759000  | 1.22496500  |
| O | -2.61003700 | 0.33794800  | 2.09918100  |
| N | -2.15119500 | 2.21822700  | 0.89766700  |
| C | -3.66736000 | -1.46216000 | -0.10977600 |
| F | -3.28409000 | -2.33202000 | 0.81986600  |
| F | -2.56963900 | -0.84503500 | -0.56656700 |
| F | -4.16739000 | -2.16165300 | -1.13752400 |
| H | -4.56747400 | 3.01989200  | -0.03246500 |
| H | -6.59537300 | 2.55050100  | -1.02974500 |
| H | -7.65166100 | 0.50403900  | -1.18757500 |
| H | -4.84553300 | -0.75381200 | 1.50032700  |
| H | -7.67105500 | -1.64933800 | -1.95889600 |
| H | -7.98544100 | -3.13610800 | -1.12404100 |
| H | -2.32514500 | 2.76120300  | 0.06343200  |
| H | -1.27406100 | 2.35830400  | 1.38214900  |

10H (Charge = 1, Multiplicity = 2):

|   |             |             |             |
|---|-------------|-------------|-------------|
| C | -2.07898600 | 2.05715000  | 0.90215500  |
| C | -2.79001200 | 3.04142200  | 0.27096500  |
| N | -3.95695200 | 2.74244100  | -0.33740200 |
| C | -4.53538300 | 1.50467800  | -0.31045800 |
| C | -3.90499100 | 0.47366700  | 0.30497700  |
| C | -2.54142500 | 0.64233200  | 0.89407000  |
| C | -4.59964200 | -0.83224100 | 0.50543800  |
| O | -4.28348300 | -1.60123300 | 1.38354500  |
| O | -5.59171200 | -1.01311700 | -0.35524600 |
| C | -7.41053200 | -2.24732400 | -1.26918300 |
| C | -6.36435800 | -2.22611300 | -0.18214900 |
| C | -1.50266700 | -0.18752900 | 0.10771000  |
| F | -1.83716800 | -1.47546900 | 0.05434000  |
| F | -0.30135700 | -0.09180200 | 0.68124000  |

|   |             |             |             |
|---|-------------|-------------|-------------|
| F | -1.39550700 | 0.25886000  | -1.14853300 |
| H | -1.13516800 | 2.29952100  | 1.37568400  |
| H | -2.47068100 | 4.07447300  | 0.22733500  |
| H | -4.46109500 | 3.49451000  | -0.80839600 |
| H | -5.51453000 | 1.42566100  | -0.76493200 |
| H | -2.51751500 | 0.22216100  | 1.91197400  |
| H | -8.01477900 | -3.15199500 | -1.16860000 |
| H | -8.06971500 | -1.37932600 | -1.19141500 |
| H | -6.94293000 | -2.25069400 | -2.25671200 |
| H | -5.68213600 | -3.07741000 | -0.24801400 |
| H | -6.80560000 | -2.21063500 | 0.81796600  |

11H (Charge = 1, Multiplicity = 2):

|   |             |             |             |
|---|-------------|-------------|-------------|
| C | -4.85260400 | 1.02340100  | 0.49162400  |
| C | -5.57226500 | 2.01007300  | -0.12404000 |
| N | -6.78839600 | 1.73518900  | -0.64272300 |
| C | -7.38050300 | 0.51085800  | -0.58599600 |
| C | -6.73739400 | -0.52768000 | 0.01406700  |
| C | -5.37731400 | -0.36138500 | 0.62988100  |
| C | -7.40862700 | -1.78686300 | 0.09204000  |
| N | -7.95320800 | -2.80561800 | 0.16225600  |
| C | -4.36067800 | -1.36537700 | 0.05969200  |
| F | -4.76297300 | -2.62125400 | 0.26104600  |
| F | -3.17555700 | -1.20848700 | 0.65022300  |
| F | -4.19815500 | -1.19021900 | -1.25342300 |
| H | -3.87310100 | 1.25102700  | 0.89520300  |
| H | -5.21928600 | 3.02767600  | -0.22943200 |
| H | -7.30139900 | 2.49050100  | -1.09991200 |
| H | -8.36617200 | 0.42817700  | -1.02606900 |
| H | -5.43337100 | -0.61001600 | 1.70556200  |

12H (Charge = 1, Multiplicity = 2):

|   |             |             |             |
|---|-------------|-------------|-------------|
| C | -3.70185800 | 1.37575700  | 0.80219900  |
| C | -4.32686900 | 2.37951100  | 0.11801100  |
| N | -5.46116200 | 2.11773800  | -0.56962300 |
| C | -6.09173700 | 0.90835500  | -0.56913400 |
| C | -5.55291000 | -0.14609000 | 0.09973800  |
| C | -4.21669300 | -0.02076100 | 0.76251500  |
| C | -6.31650000 | -1.42359900 | 0.28829700  |
| O | -5.95811500 | -2.17614400 | 1.17250200  |
| C | -7.49863300 | -1.69906100 | -0.59530500 |
| C | -3.15768700 | -0.87686100 | 0.03247100  |
| F | -3.53266600 | -2.14771000 | -0.09084900 |
| F | -2.00115900 | -0.84764400 | 0.69929700  |
| F | -2.93348300 | -0.39868300 | -1.19765000 |
| H | -2.78219200 | 1.58407700  | 1.33601800  |
| H | -3.96856100 | 3.40009300  | 0.08949400  |
| H | -5.90047700 | 2.88464600  | -1.07969400 |
| H | -7.04086200 | 0.87740900  | -1.08972800 |
| H | -4.26633800 | -0.45014700 | 1.77509800  |
| H | -7.86127800 | -2.70642800 | -0.39371600 |
| H | -8.29725900 | -0.97997300 | -0.38658500 |
| H | -7.22298000 | -1.59997000 | -1.64878100 |

13H (Charge = 1, Multiplicity = 2):

|   |             |             |             |
|---|-------------|-------------|-------------|
| C | -4.06279600 | 1.30128700  | 0.65066800  |
| C | -4.73053800 | 2.32761400  | 0.04727400  |
| N | -5.94012800 | 2.10617100  | -0.51555700 |
| C | -6.58494800 | 0.90246700  | -0.48802800 |
| C | -5.99525500 | -0.17524300 | 0.08851800  |
| C | -4.62837900 | -0.07457300 | 0.68523500  |
| C | -6.74674500 | -1.46019800 | 0.31537300  |
| O | -6.59068200 | -2.05029100 | 1.37528400  |
| N | -7.57478300 | -1.84556100 | -0.66858800 |
| C | -3.64512500 | -1.02446400 | -0.02321100 |
| F | -4.10111200 | -2.27745300 | -0.05030000 |
| F | -2.46572700 | -1.02534600 | 0.60193900  |
| F | -3.43855800 | -0.63973700 | -1.28780800 |
| H | -3.08760500 | 1.48080900  | 1.08781700  |
| H | -4.34884100 | 3.33845000  | -0.01090400 |
| H | -6.41615700 | 2.89286600  | -0.95756400 |
| H | -7.58192100 | 0.89179300  | -0.91157500 |
| H | -4.67051100 | -0.44758700 | 1.72278500  |
| H | -7.56209600 | -1.41254000 | -1.58148500 |
| H | -8.09888000 | -2.70282200 | -0.54994000 |

14H (Charge = 1, Multiplicity = 2):

|   |             |             |             |
|---|-------------|-------------|-------------|
| C | -4.06143900 | 0.82860400  | 0.84901400  |
| C | -4.71611000 | 1.84951800  | 0.22451100  |
| N | -5.92337500 | 1.65353900  | -0.36111600 |
| C | -6.55808600 | 0.43208500  | -0.30778400 |
| C | -5.98250400 | -0.63941100 | 0.28289600  |
| C | -4.62262100 | -0.54731300 | 0.89454400  |
| C | -6.61582000 | 2.75383300  | -1.03851000 |
| C | -6.74637600 | -1.91769600 | 0.50983800  |
| O | -6.60774300 | -2.50250000 | 1.57506400  |
| N | -7.56482000 | -2.30530800 | -0.48166400 |
| C | -3.63772600 | -1.50160000 | 0.19927400  |
| F | -4.09831100 | -2.75350800 | 0.17008500  |
| F | -2.46373900 | -1.50692900 | 0.83556300  |
| F | -3.41621000 | -1.12158600 | -1.06472700 |
| H | -3.09246800 | 1.01796600  | 1.29597500  |
| H | -4.31120800 | 2.85204700  | 0.16956300  |
| H | -7.55469900 | 0.41224500  | -0.73478700 |
| H | -4.67641100 | -0.91096400 | 1.93382600  |
| H | -5.99239500 | 3.64405600  | -1.00407600 |
| H | -6.80327500 | 2.45921000  | -2.07256600 |
| H | -7.56435900 | 2.93227800  | -0.52802500 |
| H | -7.53699900 | -1.87983300 | -1.39763800 |
| H | -8.09585700 | -3.15821800 | -0.36306500 |

15H (Charge = 1, Multiplicity = 2):

|   |             |            |             |
|---|-------------|------------|-------------|
| C | -4.93379100 | 0.74582900 | 0.72178400  |
| C | -5.55811300 | 1.82022600 | 0.17398500  |
| N | -6.69623400 | 1.65060400 | -0.55301500 |
| C | -7.26734200 | 0.43842000 | -0.79195800 |

|   |             |             |             |
|---|-------------|-------------|-------------|
| C | -6.70906600 | -0.68994500 | -0.28234000 |
| C | -5.49187400 | -0.62723600 | 0.57384200  |
| C | -4.41898800 | -1.60078600 | 0.07957700  |
| F | -3.36924000 | -1.61319700 | 0.90639800  |
| F | -3.97680800 | -1.25988800 | -1.13581400 |
| F | -4.90013900 | -2.84459800 | 0.00462200  |
| H | -4.02335200 | 0.88769800  | 1.29200800  |
| H | -5.20087600 | 2.83673600  | 0.27234800  |
| H | -7.13658300 | 2.47678700  | -0.95673000 |
| H | -8.16164100 | 0.44308600  | -1.40082700 |
| H | -7.16511900 | -1.65209300 | -0.48379200 |
| H | -5.75080400 | -1.01164500 | 1.57991100  |

16H (Charge = 1, Multiplicity = 2):

|   |             |             |             |
|---|-------------|-------------|-------------|
| C | -2.80587900 | 1.50382800  | -0.26285400 |
| C | -2.15203400 | 0.26745400  | -0.21001300 |
| C | -2.88797800 | -0.90200600 | -0.19046900 |
| C | -4.28907400 | -0.82195700 | -0.21091400 |
| C | -4.96300500 | 0.41519000  | -0.23929800 |
| C | -4.19762500 | 1.57523700  | -0.27812800 |
| N | -5.02469300 | -1.99014900 | -0.24293400 |
| C | -6.36366200 | -2.04245900 | -0.34664900 |
| C | -7.10513100 | -0.89144500 | -0.35976600 |
| C | -6.47162500 | 0.45140000  | -0.21330400 |
| C | -6.98186600 | 1.07311100  | 1.09465900  |
| F | -6.53762100 | 2.32228000  | 1.25699600  |
| F | -6.58662700 | 0.36099000  | 2.15663500  |
| F | -8.31878500 | 1.11404200  | 1.10751200  |
| H | -2.22528900 | 2.41936800  | -0.29393500 |
| H | -1.06888600 | 0.22411000  | -0.19516100 |
| H | -2.41174100 | -1.87722600 | -0.16751700 |
| H | -4.69116500 | 2.53966500  | -0.32410700 |
| H | -4.51074800 | -2.87214000 | -0.22205400 |
| H | -6.80338000 | -3.02890400 | -0.41645300 |
| H | -8.18333700 | -0.95669000 | -0.43813400 |
| H | -6.84850800 | 1.11630300  | -1.00411000 |

17H (Charge = 1, Multiplicity = 2):

|   |             |             |             |
|---|-------------|-------------|-------------|
| C | -0.75080400 | 1.43295000  | -0.25864700 |
| C | -0.15669600 | 0.16737200  | -0.17533500 |
| C | -0.94672300 | -0.96158600 | -0.08336400 |
| C | -2.34340300 | -0.80873200 | -0.06621500 |
| C | -2.95419300 | 0.46004100  | -0.13007700 |
| C | -2.13907000 | 1.57737100  | -0.23006300 |
| N | -3.14545700 | -1.92609600 | -0.03933100 |
| C | -4.48000800 | -1.90568700 | -0.17812700 |
| C | -5.17021400 | -0.71984300 | -0.24520800 |
| C | -4.45373300 | 0.57407400  | 0.00659000  |
| C | -4.76139800 | 1.02850800  | 1.44842800  |
| F | -6.07748800 | 1.11983300  | 1.66340200  |
| F | -4.22234500 | 2.22143400  | 1.70275800  |
| F | -4.26651900 | 0.15597900  | 2.33430000  |
| C | -6.64677300 | -0.84754200 | -0.52281100 |

|   |             |             |             |
|---|-------------|-------------|-------------|
| O | -7.15249100 | -1.96325200 | -0.55962800 |
| N | -7.32565900 | 0.28566200  | -0.76160800 |
| H | -0.12637000 | 2.31539900  | -0.34549100 |
| H | 0.92279000  | 0.07122300  | -0.19277600 |
| H | -0.52051100 | -1.95863200 | -0.03399500 |
| H | -2.58711500 | 2.56363400  | -0.28844100 |
| H | -2.68617800 | -2.83741300 | 0.01370100  |
| H | -4.98307700 | -2.86062900 | -0.26167200 |
| H | -4.82089100 | 1.37603800  | -0.64529300 |
| H | -6.93580900 | 1.21122700  | -0.66828100 |
| H | -8.31721300 | 0.20998100  | -0.94718500 |

18H (Charge = 1, Multiplicity = 2):

|   |             |             |             |
|---|-------------|-------------|-------------|
| C | -0.76794800 | 1.87127700  | -0.22674900 |
| C | -0.15823600 | 0.61491500  | -0.25520500 |
| C | -0.92450500 | -0.53636700 | -0.20634200 |
| C | -2.32290100 | -0.42808300 | -0.12169600 |
| C | -2.94472900 | 0.83687000  | -0.08674300 |
| C | -2.15389700 | 1.97674100  | -0.13866900 |
| N | -3.12067500 | -1.57550700 | -0.11977000 |
| C | -4.45690400 | -1.50747500 | -0.25376700 |
| C | -5.14859000 | -0.32027700 | -0.25267500 |
| C | -4.43762800 | 0.94803900  | 0.09087700  |
| C | -2.49067100 | -2.90025800 | -0.05013400 |
| C | -4.72679700 | 1.28389400  | 1.56738600  |
| F | -6.04068900 | 1.34508500  | 1.80561500  |
| F | -4.19458500 | 2.45849300  | 1.90827400  |
| F | -4.21225200 | 0.34920300  | 2.37558700  |
| C | -6.62562200 | -0.43373800 | -0.53202200 |
| O | -7.13495100 | -1.54513200 | -0.61965800 |
| N | -7.30268200 | 0.71156800  | -0.70771000 |
| H | -0.16328000 | 2.77023000  | -0.27500400 |
| H | 0.92055600  | 0.53374100  | -0.32444600 |
| H | -0.44421700 | -1.50557400 | -0.24555600 |
| H | -2.62848700 | 2.95198300  | -0.11451500 |
| H | -4.98689500 | -2.44347700 | -0.38345000 |
| H | -4.81400600 | 1.79858500  | -0.48959100 |
| H | -3.27357600 | -3.65013300 | 0.02774600  |
| H | -1.90040300 | -3.06466300 | -0.95366100 |
| H | -1.84695900 | -2.93644200 | 0.82957200  |
| H | -6.90126000 | 1.63180300  | -0.60887400 |
| H | -8.29288300 | 0.64803800  | -0.90447800 |

19H (Charge = 1, Multiplicity = 2):

|   |             |             |             |
|---|-------------|-------------|-------------|
| C | -1.44611600 | 1.54591000  | -0.29784600 |
| C | -0.78645000 | 0.31029300  | -0.20766700 |
| C | -1.51778200 | -0.85497300 | -0.14743500 |
| C | -2.92639600 | -0.77488700 | -0.16582900 |
| C | -3.60407300 | 0.46946600  | -0.22817200 |
| C | -2.84181900 | 1.62250700  | -0.30582200 |
| N | -3.65477600 | -1.92930700 | -0.17085000 |
| C | -4.99787500 | -1.98898700 | -0.29719300 |
| C | -5.73719700 | -0.84012800 | -0.33651600 |

|   |             |             |             |
|---|-------------|-------------|-------------|
| C | -5.11002000 | 0.51571800  | -0.16192100 |
| C | -5.55950600 | 1.10714500  | 1.18790200  |
| F | -5.09792900 | 2.34871600  | 1.34479200  |
| F | -5.11906700 | 0.37259100  | 2.21355300  |
| F | -6.89328200 | 1.15447600  | 1.26165200  |
| C | -7.14641500 | -0.94325200 | -0.52799200 |
| N | -8.28978100 | -1.01880500 | -0.69652800 |
| H | -0.86609500 | 2.45989400  | -0.36305500 |
| H | 0.29659900  | 0.27276400  | -0.19734400 |
| H | -1.04471700 | -1.83043200 | -0.09714100 |
| H | -3.33073200 | 2.58749500  | -0.37687000 |
| H | -3.14530700 | -2.81475400 | -0.13080300 |
| H | -5.43432000 | -2.97668000 | -0.37730900 |
| H | -5.50179100 | 1.20523300  | -0.92161100 |

20H (Charge = 1, Multiplicity = 2):

|   |             |             |             |
|---|-------------|-------------|-------------|
| C | 1.34427100  | 1.44364800  | -0.15158100 |
| C | 2.03486200  | 0.22162400  | -0.17245400 |
| C | 1.33308300  | -0.96360100 | -0.15808700 |
| C | -0.07572400 | -0.91860200 | -0.11481100 |
| C | -0.78359900 | 0.30466300  | -0.07058500 |
| C | -0.04871900 | 1.48084400  | -0.10124000 |
| N | -0.77765500 | -2.09285700 | -0.14607400 |
| C | -2.12194100 | -2.17478800 | -0.19249900 |
| C | -2.88994000 | -1.04818700 | -0.14828900 |
| C | -2.29198700 | 0.31779800  | -0.00422800 |
| C | -2.82244300 | 1.01028200  | 1.29429600  |
| F | -3.62836400 | 2.03308000  | 0.99772300  |
| F | -1.83424900 | 1.49600300  | 2.05070400  |
| F | -3.51630200 | 0.16022200  | 2.06439600  |
| C | -4.36610200 | -1.22865500 | -0.24369800 |
| O | -4.91007400 | -2.30929100 | -0.25938900 |
| O | -4.98145700 | -0.05594400 | -0.30801300 |
| C | -6.89458200 | 1.34978400  | -0.26128800 |
| C | -6.42746800 | -0.08327200 | -0.33707900 |
| H | 1.90016900  | 2.37453400  | -0.17557800 |
| H | 3.11807700  | 0.21052300  | -0.20878300 |
| H | 1.83100100  | -1.92775500 | -0.18969700 |
| H | -0.56817600 | 2.43367500  | -0.08347100 |
| H | -0.24690700 | -2.96555300 | -0.17385000 |
| H | -2.55112500 | -3.16573400 | -0.27404600 |
| H | -2.66791900 | 0.94816400  | -0.82262800 |
| H | -7.98668000 | 1.37525700  | -0.27494900 |
| H | -6.54539100 | 1.81829400  | 0.66194000  |
| H | -6.52267500 | 1.92458800  | -1.11295200 |
| H | -6.74168700 | -0.57680700 | -1.26059800 |
| H | -6.77505300 | -0.67793300 | 0.51159100  |

21H (Charge = 1, Multiplicity = 2):

|   |             |            |             |
|---|-------------|------------|-------------|
| C | -0.04977700 | 0.64891600 | 0.84709300  |
| C | -0.09532900 | 1.39983500 | -0.33451500 |
| C | -1.27143600 | 1.48801000 | -1.05112300 |
| C | -2.41282400 | 0.80950700 | -0.57736100 |

|   |             |             |             |
|---|-------------|-------------|-------------|
| C | -2.37200300 | 0.03019000  | 0.60151300  |
| C | -1.17972100 | -0.03373700 | 1.30437000  |
| N | -3.59681000 | 0.95113400  | -1.24630300 |
| C | -4.80754800 | 0.50404300  | -0.79615000 |
| C | -4.86299800 | -0.28801800 | 0.37363500  |
| C | -3.58214500 | -0.77565800 | 1.00339500  |
| C | -5.97758100 | 0.88859700  | -1.48196100 |
| C | -7.20333100 | 0.49423100  | -0.98565900 |
| C | -7.27114200 | -0.27129000 | 0.18569200  |
| C | -6.10775600 | -0.66180400 | 0.85374500  |
| C | -3.35603300 | -2.23025800 | 0.57318500  |
| F | -4.38205300 | -3.01221600 | 0.92478300  |
| F | -2.25283700 | -2.74147700 | 1.13009200  |
| F | -3.21618000 | -2.32108400 | -0.75776600 |
| H | 0.87288300  | 0.59191100  | 1.41414700  |
| H | 0.78954900  | 1.92012200  | -0.68291800 |
| H | -1.34220800 | 2.07619200  | -1.96065700 |
| H | -1.12930600 | -0.62194500 | 2.21465500  |
| H | -3.59041700 | 1.50820400  | -2.10310200 |
| H | -3.67924900 | -0.80213400 | 2.09400300  |
| H | -5.89205200 | 1.49642300  | -2.37752100 |
| H | -8.11285200 | 0.78513800  | -1.49879600 |
| H | -8.23677600 | -0.56902600 | 0.57945900  |
| H | -6.17258600 | -1.26380600 | 1.75406200  |

22H (Charge = 1, Multiplicity = 2):

|   |             |             |             |
|---|-------------|-------------|-------------|
| C | -0.16353300 | 0.52179400  | 1.41642100  |
| C | -0.15680400 | 1.34611400  | 0.28730100  |
| C | -1.26188300 | 1.41061900  | -0.54011200 |
| C | -2.40584500 | 0.64178200  | -0.23506700 |
| C | -2.41643500 | -0.18455100 | 0.91212400  |
| C | -1.29085000 | -0.24039100 | 1.71900400  |
| N | -3.54136000 | 0.72932400  | -1.02850200 |
| C | -4.78413000 | 0.32757500  | -0.55993200 |
| C | -4.86600000 | -0.50643800 | 0.57917200  |
| C | -3.60661200 | -1.05926400 | 1.18115200  |
| C | -5.96445000 | 0.78710000  | -1.18344600 |
| C | -7.19404700 | 0.41734800  | -0.67241400 |
| C | -7.27506400 | -0.41290900 | 0.44938200  |
| C | -6.11151100 | -0.87258200 | 1.06455100  |
| C | -3.43913500 | 1.34387300  | -2.35780300 |
| C | -3.34406500 | -2.45183700 | 0.60156100  |
| F | -2.24455900 | -3.00001700 | 1.13018500  |
| F | -3.17104600 | -2.39997000 | -0.72792100 |
| F | -4.36522300 | -3.28092100 | 0.84320100  |
| H | 0.70696800  | 0.47618000  | 2.06162700  |
| H | 0.71466400  | 1.94886400  | 0.05806200  |
| H | -1.25305800 | 2.07801700  | -1.39215600 |
| H | -1.29972400 | -0.88658100 | 2.59082100  |
| H | -3.73366000 | -1.20912000 | 2.25829600  |
| H | -5.91900300 | 1.45720800  | -2.03201300 |
| H | -8.09787900 | 0.78590300  | -1.14410400 |
| H | -8.24319600 | -0.69878200 | 0.84570600  |

|   |             |             |             |
|---|-------------|-------------|-------------|
| H | -6.16813700 | -1.52245700 | 1.93180900  |
| H | -2.46039300 | 1.11736900  | -2.77276700 |
| H | -4.19824200 | 0.91084800  | -3.00318700 |
| H | -3.57859600 | 2.42590400  | -2.28095200 |

23H (Charge = 1, Multiplicity = 2):

|   |             |             |             |
|---|-------------|-------------|-------------|
| N | 0.04629500  | -0.84106400 | 0.36592400  |
| C | 0.18216700  | 0.45906500  | -0.08871500 |
| N | -1.00933500 | 1.12763300  | -0.38824300 |
| C | -2.24833400 | 0.59968200  | -0.26254300 |
| C | -2.37150300 | -0.72517900 | 0.19818200  |
| C | -1.16780700 | -1.47628700 | 0.57481800  |
| N | -3.33326700 | 1.31334200  | -0.59206200 |
| C | -4.62495700 | 0.90278300  | -0.16955200 |
| C | -4.82363900 | -0.41622600 | 0.26551000  |
| C | -3.69093000 | -1.40099300 | 0.18782400  |
| C | -5.67475500 | 1.82670500  | -0.13623800 |
| C | -6.92447200 | 1.41658000  | 0.30701200  |
| C | -7.13562800 | 0.10238200  | 0.72122400  |
| C | -6.08435600 | -0.80882700 | 0.69889000  |
| C | -3.17253200 | 2.58532400  | -1.30960200 |
| O | -1.23271900 | -2.60040400 | 1.03540300  |
| O | 1.24189000  | 1.02410500  | -0.22129700 |
| C | 1.25217400  | -1.59951400 | 0.70820200  |
| C | -3.82324200 | -2.20536300 | -1.12181200 |
| F | -4.96589000 | -2.89171400 | -1.14216600 |
| F | -2.81772000 | -3.06830600 | -1.27399400 |
| F | -3.81762600 | -1.38394100 | -2.18098600 |
| H | -0.87583000 | 2.10639700  | -0.62804500 |
| H | -3.73446100 | -2.13958300 | 0.99617400  |
| H | -5.52208000 | 2.85917300  | -0.42351400 |
| H | -7.73545100 | 2.13574700  | 0.33797200  |
| H | -8.11352300 | -0.20996400 | 1.07053100  |
| H | -6.23288300 | -1.83273200 | 1.02648000  |
| H | -4.06776400 | 2.76288700  | -1.89917900 |
| H | -3.01253600 | 3.40167600  | -0.60010100 |
| H | -2.32825100 | 2.49865700  | -1.99284100 |
| H | 2.11746600  | -1.01126400 | 0.41692500  |
| H | 1.26884300  | -1.79118300 | 1.78221800  |
| H | 1.23855300  | -2.54737900 | 0.16996300  |

24H (Charge = 1, Multiplicity = 2):

|   |             |             |             |
|---|-------------|-------------|-------------|
| N | 0.04219500  | -1.11700600 | 0.32766200  |
| C | 0.18056200  | 0.22983500  | 0.03828700  |
| N | -0.99975300 | 0.99127100  | -0.08846800 |
| C | -2.22724300 | 0.40504200  | -0.08972600 |
| C | -2.35980400 | -0.93623900 | 0.31097000  |
| C | -1.16324300 | -1.72961700 | 0.61925400  |
| N | -3.32221400 | 1.07443400  | -0.50731000 |
| C | -4.61478100 | 0.67193500  | -0.08337300 |
| C | -4.81457600 | -0.63611700 | 0.37580100  |
| C | -3.68102600 | -1.61381700 | 0.27059800  |
| C | -5.66743800 | 1.59149500  | -0.10845800 |



|   |             |             |             |
|---|-------------|-------------|-------------|
| C | -6.92017900 | 1.19160400  | 0.33573300  |
| C | -7.12873500 | -0.10864200 | 0.79625100  |
| C | -6.07789900 | -1.02125300 | 0.80805600  |
| C | -3.23075900 | 2.15495500  | -1.50661200 |
| O | -1.24036600 | -2.86205500 | 1.05656500  |
| O | 1.26245500  | 0.75904300  | -0.06557900 |
| C | 1.27861900  | -1.88565900 | 0.49503300  |
| C | -0.80819400 | 2.44966000  | 0.04298200  |
| C | -3.81109300 | -2.36705500 | -1.06946400 |
| F | -4.95428900 | -3.05122500 | -1.11767000 |
| F | -2.80645100 | -3.22471600 | -1.25546600 |
| F | -3.80318800 | -1.50590800 | -2.09723600 |
| H | -3.72253400 | -2.38233300 | 1.05047100  |
| H | -5.50765100 | 2.60823200  | -0.44698300 |
| H | -7.73725100 | 1.90456500  | 0.32825600  |
| H | -8.10988400 | -0.41186200 | 1.14467600  |
| H | -6.23119700 | -2.03951900 | 1.15099600  |
| H | -4.04298800 | 1.99532300  | -2.21533000 |
| H | -3.32987300 | 3.13874900  | -1.04600000 |
| H | -2.27999500 | 2.06875100  | -2.02692000 |
| H | 1.97965800  | -1.59053100 | -0.28270700 |
| H | 1.71342800  | -1.68950000 | 1.47744500  |
| H | 1.03130300  | -2.94039500 | 0.40337900  |
| H | 0.00950200  | 2.60578200  | 0.74330900  |
| H | -0.55762300 | 2.90774400  | -0.91346900 |
| H | -1.71715800 | 2.88382700  | 0.45334800  |

25H (Charge = 1, Multiplicity = 2):

|   |             |             |             |
|---|-------------|-------------|-------------|
| C | -2.11118700 | 0.54063600  | 0.84479800  |
| C | -2.29383000 | 1.82475700  | 1.36977300  |
| C | -3.56425100 | 2.40349100  | 1.39985700  |
| C | -4.65179300 | 1.70367500  | 0.90889100  |
| C | -4.48687200 | 0.39420600  | 0.37166200  |
| C | -3.18498400 | -0.16903100 | 0.34555900  |
| C | -6.02425300 | 2.30681400  | 1.02960000  |
| N | -6.98699200 | 1.67041200  | 0.14965500  |
| C | -6.82654000 | 0.47758200  | -0.35762800 |
| C | -5.62360000 | -0.24955400 | -0.19771100 |
| C | -5.60688500 | -1.66704100 | -0.67318700 |
| O | -4.82004800 | -2.49879300 | -0.28238300 |
| O | -6.57476400 | -1.89289300 | -1.55733800 |
| C | -7.46676400 | -4.09627600 | -1.01913800 |
| C | -6.71593600 | -3.25578300 | -2.02934600 |
| C | -6.55654300 | 2.14803900  | 2.46447700  |
| F | -5.76847700 | 2.78012600  | 3.33155100  |
| F | -6.61389400 | 0.85811100  | 2.80875400  |
| F | -7.78815200 | 2.65459700  | 2.56574400  |
| H | -1.11933300 | 0.10350600  | 0.81871500  |
| H | -1.44411500 | 2.38129100  | 1.75031300  |
| H | -3.70113100 | 3.40133300  | 1.80354400  |
| H | -3.04097200 | -1.15338600 | -0.07803500 |
| H | -6.00810500 | 3.37981800  | 0.81656100  |
| H | -7.86753700 | 2.15693300  | -0.01490700 |

|   |             |             |             |
|---|-------------|-------------|-------------|
| H | -7.65597900 | 0.07441100  | -0.92779900 |
| H | -7.61209300 | -5.10078700 | -1.42490500 |
| H | -6.90637800 | -4.17902800 | -0.08515600 |
| H | -8.44752700 | -3.66146200 | -0.81129600 |
| H | -7.26740300 | -3.15737200 | -2.96428500 |
| H | -5.72088700 | -3.65506400 | -2.23443300 |

26H (Charge = 1, Multiplicity = 2):

|   |             |             |             |
|---|-------------|-------------|-------------|
| C | -2.41615300 | -0.43592800 | 0.08822800  |
| C | -2.42253900 | 0.95619600  | -0.04881400 |
| C | -3.62681800 | 1.65299200  | -0.15413400 |
| C | -4.82895200 | 0.96513100  | -0.12137400 |
| C | -4.84000300 | -0.45052400 | 0.00932100  |
| C | -3.60568700 | -1.13703700 | 0.11181900  |
| C | -6.11915700 | 1.73917800  | -0.16321600 |
| N | -7.26796100 | 0.89510700  | -0.43330700 |
| C | -7.26359200 | -0.41193600 | -0.33212400 |
| C | -6.08861900 | -1.13800200 | -0.05667000 |
| C | -6.19383200 | -2.62134900 | 0.19054600  |
| O | -5.55709100 | -3.13670200 | 1.09911000  |
| N | -7.04279500 | -3.28700200 | -0.61228900 |
| C | -6.38636200 | 2.43935900  | 1.18074800  |
| F | -5.43386200 | 3.33110500  | 1.44750600  |
| F | -6.43117500 | 1.55924500  | 2.18378800  |
| F | -7.56091100 | 3.07748200  | 1.14362200  |
| H | -1.47482300 | -0.96845000 | 0.16532800  |
| H | -1.48600000 | 1.50249000  | -0.07985400 |
| H | -3.62249200 | 2.73205100  | -0.26582100 |
| H | -3.60754600 | -2.21541500 | 0.20553000  |
| H | -6.08125600 | 2.53157000  | -0.91882000 |
| H | -8.14790400 | 1.36261600  | -0.64640500 |
| H | -8.21954500 | -0.90510000 | -0.47880600 |
| H | -7.44167400 | -2.87420400 | -1.44425200 |
| H | -7.14486400 | -4.28482700 | -0.47764600 |

27H (Charge = 1, Multiplicity = 2):

|   |             |             |             |
|---|-------------|-------------|-------------|
| C | -1.30389400 | -0.64215000 | 0.18809000  |
| C | -1.28934400 | 0.75070000  | 0.06541500  |
| C | -2.48450700 | 1.46744200  | -0.01755800 |
| C | -3.69233800 | 0.79178700  | 0.01159200  |
| C | -3.72501400 | -0.62008500 | 0.12980700  |
| C | -2.50422400 | -1.32838200 | 0.21696400  |
| C | -4.98433500 | 1.56370000  | 0.04412400  |
| N | -6.12589000 | 0.78364800  | -0.43266000 |
| C | -6.12923200 | -0.52732700 | -0.33671100 |
| C | -4.99246900 | -1.27179500 | 0.03947700  |
| C | -7.25676800 | 1.51905500  | -1.00653900 |
| C | -5.13594100 | -2.74824400 | 0.30321400  |
| O | -4.53568000 | -3.25667100 | 1.24004500  |
| N | -5.97342800 | -3.41600200 | -0.51178300 |
| C | -5.27522700 | 1.98510200  | 1.49871800  |
| F | -6.39923800 | 2.70117500  | 1.59354000  |
| F | -4.27442100 | 2.72585400  | 1.97220400  |

|   |             |             |             |
|---|-------------|-------------|-------------|
| F | -5.41224000 | 0.91146500  | 2.28353500  |
| H | -0.36973500 | -1.18906700 | 0.25130100  |
| H | -0.34450100 | 1.28240200  | 0.03212900  |
| H | -2.47166300 | 2.54909700  | -0.10516300 |
| H | -2.52057900 | -2.40790900 | 0.29919900  |
| H | -4.91874000 | 2.48080700  | -0.54806000 |
| H | -7.05866800 | -1.02463700 | -0.59986900 |
| H | -6.90336200 | 2.03350100  | -1.90300800 |
| H | -8.04358300 | 0.81267300  | -1.26179000 |
| H | -7.62306900 | 2.24975400  | -0.28612500 |
| H | -6.31268200 | -3.02378000 | -1.37954400 |
| H | -6.08025200 | -4.41208500 | -0.36779500 |

28H (Charge = 1, Multiplicity = 2):

|   |             |             |             |
|---|-------------|-------------|-------------|
| C | -2.42626800 | -0.85667200 | -0.34111000 |
| C | -2.47166200 | 0.54039300  | -0.43691100 |
| C | -3.69025100 | 1.22261100  | -0.40355900 |
| C | -4.87300500 | 0.51502300  | -0.27633100 |
| C | -4.83928300 | -0.90336900 | -0.19935000 |
| C | -3.59639400 | -1.57796200 | -0.22914000 |
| C | -6.17917100 | 1.25572500  | -0.16226900 |
| N | -7.33722100 | 0.39069100  | -0.32708200 |
| C | -7.30305400 | -0.91151700 | -0.27677100 |
| C | -6.07583500 | -1.60703300 | -0.15977500 |
| C | -6.12485600 | -3.02779900 | -0.07146800 |
| N | -6.15270600 | -4.18338100 | 0.00453400  |
| C | -6.31489600 | 1.92185600  | 1.21888400  |
| F | -5.35270100 | 2.82289400  | 1.40204500  |
| F | -6.23912100 | 1.01798500  | 2.19791000  |
| F | -7.49583600 | 2.53840500  | 1.31870500  |
| H | -1.47238800 | -1.37081700 | -0.36618800 |
| H | -1.55087500 | 1.10395200  | -0.54130200 |
| H | -3.71013900 | 2.30432600  | -0.48075000 |
| H | -3.57733700 | -2.66183700 | -0.17354900 |
| H | -6.24226500 | 2.06157900  | -0.90164600 |
| H | -8.24377000 | 0.84476500  | -0.43997400 |
| H | -8.24757100 | -1.43981600 | -0.35490400 |

29H (Charge = 1, Multiplicity = 2):

|   |             |             |             |
|---|-------------|-------------|-------------|
| C | -7.12892600 | 1.49212600  | -0.42972200 |
| C | -6.38260000 | 2.67257500  | -0.43473000 |
| C | -4.99736300 | 2.61953800  | -0.32866500 |
| C | -4.35608700 | 1.38950100  | -0.21648400 |
| C | -5.09592600 | 0.19265600  | -0.20710900 |
| C | -6.49495300 | 0.26487100  | -0.32475800 |
| C | -2.86394000 | 1.35943400  | -0.03668300 |
| N | -2.28929000 | 0.06558900  | -0.33124400 |
| C | -2.95489500 | -1.08650300 | -0.28484700 |
| C | -4.39147800 | -1.08413700 | -0.14223000 |
| C | -2.22343100 | -2.30917300 | -0.38846900 |
| C | -2.88963400 | -3.49444000 | -0.27450700 |
| C | -4.29307700 | -3.50166600 | -0.06832600 |
| C | -5.02104200 | -2.32110300 | -0.01080700 |

|   |             |             |             |
|---|-------------|-------------|-------------|
| C | -2.49258800 | 1.69136800  | 1.41887400  |
| F | -2.89900300 | 2.91718400  | 1.74695900  |
| F | -1.16837700 | 1.62886700  | 1.59175500  |
| F | -3.05544300 | 0.82156700  | 2.26409900  |
| H | -8.20894100 | 1.53183100  | -0.52113300 |
| H | -6.87957100 | 3.63194000  | -0.53081600 |
| H | -4.40956700 | 3.53185300  | -0.33995300 |
| H | -7.08844600 | -0.64143500 | -0.34845700 |
| H | -2.37180700 | 2.11167700  | -0.66070900 |
| H | -1.27821300 | 0.02961300  | -0.45876300 |
| H | -1.14786300 | -2.25953100 | -0.52520300 |
| H | -2.34931000 | -4.43248900 | -0.32887000 |
| H | -4.80913200 | -4.44942200 | 0.03746300  |
| H | -6.09326300 | -2.37229100 | 0.13333900  |

30H (Charge = 1, Multiplicity = 2):

|   |             |             |             |
|---|-------------|-------------|-------------|
| C | -7.16118700 | 1.46565500  | -0.19973900 |
| C | -6.42755300 | 2.65329700  | -0.24504300 |
| C | -5.03800700 | 2.61424100  | -0.20575700 |
| C | -4.38554200 | 1.38833800  | -0.11951200 |
| C | -5.10957800 | 0.18897700  | -0.06080800 |
| C | -6.51250300 | 0.24363900  | -0.11641100 |
| C | -2.88931600 | 1.35275900  | -0.00527600 |
| N | -2.29289800 | 0.09063900  | -0.42622000 |
| C | -2.95417300 | -1.07137000 | -0.28163900 |
| C | -4.37459100 | -1.07042200 | -0.00624200 |
| C | -2.25551400 | -2.31094100 | -0.41239900 |
| C | -2.91540500 | -3.48884700 | -0.19573500 |
| C | -4.28851300 | -3.48663900 | 0.14096900  |
| C | -4.99573500 | -2.29731600 | 0.22533000  |
| C | -0.88525900 | 0.12695800  | -0.84024200 |
| C | -2.47737400 | 1.58458200  | 1.46106200  |
| F | -2.91246800 | 2.76974400  | 1.88735300  |
| F | -1.14855100 | 1.55427900  | 1.60417600  |
| F | -2.99187000 | 0.63846600  | 2.25428100  |
| H | -8.24464900 | 1.49523200  | -0.24172900 |
| H | -6.93846600 | 3.60706600  | -0.32179200 |
| H | -4.45792400 | 3.53066400  | -0.24855000 |
| H | -7.09780400 | -0.66818000 | -0.11017600 |
| H | -2.43680900 | 2.15910200  | -0.58774400 |
| H | -1.19776000 | -2.31328400 | -0.64047800 |
| H | -2.37880900 | -4.42805300 | -0.26659000 |
| H | -4.79665400 | -4.42633800 | 0.32701300  |
| H | -6.05039200 | -2.32780800 | 0.47001300  |
| H | -0.60204500 | 1.16453800  | -0.99842700 |
| H | -0.25094900 | -0.31177500 | -0.06639900 |
| H | -0.77301600 | -0.42720100 | -1.77328800 |

31H (Charge = 1, Multiplicity = 2):

|   |             |             |            |
|---|-------------|-------------|------------|
| C | -0.69728400 | -1.11852900 | 0.45568200 |
| C | -0.22607200 | 0.16728800  | 0.31854700 |
| C | -1.11423400 | 1.24659100  | 0.11816500 |
| C | -2.47087400 | 1.02387600  | 0.05904900 |

|   |             |             |             |
|---|-------------|-------------|-------------|
| C | -2.97633000 | -0.28803000 | 0.22668100  |
| C | -2.08622400 | -1.37602300 | 0.42184800  |
| C | -3.42610100 | 2.14547300  | -0.26739000 |
| N | -4.81519300 | 1.81081000  | 0.00530700  |
| C | -5.28921300 | 0.57747200  | 0.15511400  |
| C | -4.37629800 | -0.52799700 | 0.24809600  |
| C | -6.69525600 | 0.36092100  | 0.25845500  |
| C | -7.17179100 | -0.91992900 | 0.41309000  |
| C | -6.28809000 | -2.00835000 | 0.49414800  |
| C | -4.88475900 | -1.82263800 | 0.42768900  |
| C | -3.97010600 | -2.91291200 | 0.57410500  |
| C | -2.62432400 | -2.69217400 | 0.57839400  |
| C | -3.34064500 | 2.50221400  | -1.75838300 |
| F | -2.12504100 | 2.95036000  | -2.07223400 |
| F | -4.22819800 | 3.45589100  | -2.06427700 |
| F | -3.60540700 | 1.44004600  | -2.52583800 |
| H | -0.01215000 | -1.94810900 | 0.60062700  |
| H | 0.83991700  | 0.36326600  | 0.36020600  |
| H | -0.72221900 | 2.25238600  | 0.00553600  |
| H | -3.17570500 | 3.05820600  | 0.28244600  |
| H | -5.47994900 | 2.58258200  | -0.01894400 |
| H | -7.36219400 | 1.21466000  | 0.19592300  |
| H | -8.23980900 | -1.09323500 | 0.47597200  |
| H | -6.67744300 | -3.01299700 | 0.62403500  |
| H | -4.37167800 | -3.91332000 | 0.69974900  |
| H | -1.93113000 | -3.51779800 | 0.70820400  |

32H (Charge = 1, Multiplicity = 2):

|   |             |             |             |
|---|-------------|-------------|-------------|
| C | -6.76396600 | 0.43913700  | 0.28559900  |
| C | -7.13297600 | -0.87050400 | 0.00542600  |
| C | -6.20813400 | -1.91450300 | -0.20692300 |
| C | -4.80616500 | -1.66629100 | -0.13969800 |
| C | -4.44289100 | -0.35071000 | 0.14726900  |
| C | -5.37560700 | 0.70835900  | 0.35507900  |
| C | -3.73579900 | -2.56805100 | -0.32572400 |
| C | -2.42356500 | -2.11213500 | -0.22148200 |
| C | -2.09738200 | -0.77202300 | 0.06969600  |
| C | -3.14437100 | 0.11767700  | 0.26049000  |
| C | -3.24010800 | 1.59220000  | 0.57742900  |
| N | -4.68900000 | 1.82252600  | 0.60012300  |
| C | -2.59371800 | 2.46591800  | -0.48998300 |
| F | -2.76564400 | 3.76155800  | -0.21129200 |
| F | -3.11619200 | 2.23516900  | -1.69657600 |
| F | -1.28304500 | 2.21804600  | -0.54701400 |
| H | -7.49923400 | 1.21944800  | 0.44066200  |
| H | -8.18974800 | -1.10633700 | -0.05513400 |
| H | -6.57171800 | -2.91350300 | -0.42316500 |
| H | -3.93490600 | -3.61106100 | -0.54981100 |
| H | -1.61346300 | -2.81807900 | -0.36928600 |
| H | -1.06025300 | -0.46327000 | 0.13934000  |
| H | -2.79321700 | 1.85887200  | 1.54180500  |
| H | -5.10112000 | 2.72755100  | 0.81317400  |

## 33H (Charge = 1, Multiplicity = 2):

|   |             |             |             |
|---|-------------|-------------|-------------|
| C | -4.99245000 | 2.59409600  | 1.57639000  |
| C | -5.16838700 | 3.23605400  | 0.31838800  |
| C | -5.78738600 | 2.58627900  | -0.70787600 |
| C | -6.25351400 | 1.25326200  | -0.51643000 |
| C | -6.10248600 | 0.62404700  | 0.77373300  |
| C | -5.45160900 | 1.31377100  | 1.80183600  |
| N | -6.84316500 | 0.60195700  | -1.51960000 |
| C | -7.19709600 | -0.80335100 | -1.49725300 |
| C | -7.26898200 | -1.32424200 | -0.10354900 |
| N | -6.64659200 | -0.62539300 | 0.93269500  |
| C | -7.75835900 | -2.48883200 | 0.39872200  |
| C | -7.44209800 | -2.51087400 | 1.79978400  |
| C | -6.76767300 | -1.36669500 | 2.10148700  |
| C | -6.13210900 | -1.56540800 | -2.29955900 |
| F | -6.44060700 | -2.85935500 | -2.37470300 |
| F | -4.92963300 | -1.45118000 | -1.72658000 |
| F | -6.04156300 | -1.08166500 | -3.54203600 |
| H | -4.48916600 | 3.12477300  | 2.37662700  |
| H | -4.79923700 | 4.24550600  | 0.17886400  |
| H | -5.92554800 | 3.04172800  | -1.68301000 |
| H | -5.31457400 | 0.84408000  | 2.76756600  |
| H | -6.95193500 | 1.09058500  | -2.40766600 |
| H | -8.14619300 | -0.94321000 | -2.02320100 |
| H | -8.28007800 | -3.24868300 | -0.16533100 |
| H | -7.70155600 | -3.29019300 | 2.50133800  |
| H | -6.38483600 | -0.99705900 | 3.03936700  |

## 34H (Charge = 1, Multiplicity = 2):

|   |             |             |             |
|---|-------------|-------------|-------------|
| C | -7.17744500 | -1.22987300 | -0.28542700 |
| C | -6.24339800 | -2.28989800 | -0.48379000 |
| C | -4.88912300 | -2.11625500 | -0.30985600 |
| C | -4.46537300 | -0.83417400 | 0.07302600  |
| C | -5.40622500 | 0.23333500  | 0.27368900  |
| C | -6.78377200 | 0.03354200  | 0.09313900  |
| N | -3.24106300 | -0.34703800 | 0.33290400  |
| C | -3.29324700 | 1.05192600  | 0.68246400  |
| N | -4.71066300 | 1.31952100  | 0.64794000  |
| C | -2.56524700 | 1.89344600  | -0.37754300 |
| F | -1.27022600 | 1.57761400  | -0.39776300 |
| F | -2.68816600 | 3.18999300  | -0.09277600 |
| F | -3.07104600 | 1.67857800  | -1.59131700 |
| H | -8.23124900 | -1.43397300 | -0.43954300 |
| H | -6.62024600 | -3.26205400 | -0.78167000 |
| H | -4.17327700 | -2.91570500 | -0.45746600 |
| H | -7.48653600 | 0.84339700  | 0.24664800  |
| H | -2.37632900 | -0.87960900 | 0.31801500  |
| H | -2.84074500 | 1.26607300  | 1.65788600  |
| H | -5.10932500 | 2.22115400  | 0.89143700  |

## 35H (Charge = 1, Multiplicity = 2):

|   |             |             |             |
|---|-------------|-------------|-------------|
| C | -7.16922600 | -1.38750100 | -0.40414700 |
| C | -6.24927300 | -2.44044700 | -0.67436500 |

|   |             |             |             |
|---|-------------|-------------|-------------|
| C | -4.88851600 | -2.27828000 | -0.53243300 |
| C | -4.44523700 | -1.01653200 | -0.10423500 |
| C | -5.37108200 | 0.04423900  | 0.16683000  |
| C | -6.75497400 | -0.14213300 | 0.01514400  |
| N | -3.20435700 | -0.56511400 | 0.15198200  |
| C | -3.25145900 | 0.83723500  | 0.50640500  |
| N | -4.66988500 | 1.11560400  | 0.57977400  |
| C | -5.21467200 | 2.40325800  | 0.98302300  |
| C | -1.96985700 | -1.32771500 | 0.04595900  |
| C | -2.61024600 | 1.68110400  | -0.61114600 |
| F | -1.32016300 | 1.37044400  | -0.74653800 |
| F | -2.70415000 | 2.98054200  | -0.32543500 |
| F | -3.22159100 | 1.46050700  | -1.77518900 |
| H | -8.22835300 | -1.57671200 | -0.53998400 |
| H | -6.63786900 | -3.39647000 | -1.00738400 |
| H | -4.18551600 | -3.07455400 | -0.74580700 |
| H | -7.45195000 | 0.66374400  | 0.21179300  |
| H | -2.72842800 | 1.05385600  | 1.44656800  |
| H | -4.51953300 | 2.87618300  | 1.67659500  |
| H | -5.36509300 | 3.04638300  | 0.11203900  |
| H | -6.16764800 | 2.23294100  | 1.48479700  |
| H | -1.23375600 | -0.90098900 | 0.72694200  |
| H | -2.17508600 | -2.35868000 | 0.33636500  |
| H | -1.58761400 | -1.30091600 | -0.97754900 |

36H (Charge = 1, Multiplicity = 2):

|   |             |             |             |
|---|-------------|-------------|-------------|
| C | -4.93091100 | -0.09937600 | 0.63553600  |
| C | -4.85339900 | 0.10012400  | -0.80414000 |
| C | -3.62831300 | 0.03085000  | -1.47592700 |
| C | -2.49635300 | -0.23149600 | -0.72087400 |
| C | -2.57396000 | -0.43270100 | 0.71463000  |
| C | -3.78298100 | -0.36705200 | 1.38897600  |
| N | -1.20555100 | -0.36767000 | -1.07117600 |
| C | -0.36702600 | -0.61251300 | 0.07473700  |
| N | -1.32624200 | -0.68383200 | 1.14759900  |
| C | -6.21218700 | -0.01435000 | 1.26897700  |
| C | -7.33362000 | 0.24713900  | 0.54202400  |
| C | -7.25730500 | 0.44274000  | -0.87509700 |
| C | -6.06159300 | 0.37191000  | -1.52294200 |
| C | 0.58728600  | 0.57398000  | 0.29286700  |
| F | 1.41213200  | 0.69251500  | -0.74766800 |
| F | 1.31059600  | 0.38319000  | 1.39623900  |
| F | -0.09057500 | 1.71358100  | 0.42515000  |
| H | -3.56568400 | 0.18043800  | -2.54789800 |
| H | -3.83673000 | -0.51724000 | 2.46136000  |
| H | -0.84249600 | -0.31974100 | -2.01824300 |
| H | 0.23445100  | -1.52352200 | -0.02253400 |
| H | -1.06478200 | -0.88252200 | 2.10860200  |
| H | -6.26253300 | -0.16405900 | 2.34304000  |
| H | -8.29888800 | 0.30996300  | 1.03339000  |
| H | -8.16630800 | 0.64975400  | -1.43019700 |
| H | -5.99564300 | 0.51988900  | -2.59643000 |

37H (Charge = 1, Multiplicity = 2):

|   |             |             |             |
|---|-------------|-------------|-------------|
| C | -2.15402400 | -0.02720000 | -1.52257300 |
| C | -2.07313400 | 1.28997500  | -0.98834500 |
| C | -2.96605200 | 1.74941300  | -0.03367500 |
| C | -3.95984800 | 0.87578800  | 0.39468100  |
| C | -4.04710900 | -0.45084700 | -0.14456800 |
| C | -3.12324200 | -0.90510800 | -1.11689200 |
| S | -5.17618400 | 1.16758300  | 1.59093900  |
| C | -5.90385300 | -0.48795100 | 1.32386300  |
| N | -5.04636700 | -1.15950700 | 0.38192400  |
| C | -7.31774100 | -0.35904900 | 0.74396500  |
| F | -7.83892600 | -1.57072000 | 0.55335700  |
| F | -7.30177700 | 0.27707100  | -0.42690800 |
| F | -8.09768200 | 0.31789500  | 1.58477500  |
| H | -1.42934600 | -0.33470400 | -2.26783900 |
| H | -1.28908800 | 1.95045900  | -1.34144800 |
| H | -2.89385400 | 2.75375500  | 0.36721500  |
| H | -3.20673600 | -1.91177300 | -1.50972600 |
| H | -5.96854100 | -1.03780500 | 2.26874900  |
| H | -5.21341100 | -2.13727500 | 0.14250600  |

38H (Charge = 1, Multiplicity = 2):

|   |             |             |             |
|---|-------------|-------------|-------------|
| C | -2.15071900 | 0.43504200  | -1.51846200 |
| C | -2.08960800 | 1.74655900  | -0.97738400 |
| C | -2.98372500 | 2.17757100  | -0.00927300 |
| C | -3.95331400 | 1.28074400  | 0.42287600  |
| C | -4.01919900 | -0.04455400 | -0.11508300 |
| C | -3.09599500 | -0.46722900 | -1.10352300 |
| S | -5.15894400 | 1.55165600  | 1.63728100  |
| C | -5.88192900 | -0.09584600 | 1.32985100  |
| N | -4.99141900 | -0.79260800 | 0.42518800  |
| C | -5.21638000 | -2.20321400 | 0.10841600  |
| C | -7.26774400 | 0.06798600  | 0.68547900  |
| F | -7.84474600 | -1.12070900 | 0.50651700  |
| F | -7.17366800 | 0.66586100  | -0.50227300 |
| F | -8.05010400 | 0.80289900  | 1.47365400  |
| H | -1.43476600 | 0.14714300  | -2.27976400 |
| H | -1.32546300 | 2.42789000  | -1.33453400 |
| H | -2.93131700 | 3.18067500  | 0.39801800  |
| H | -3.15627800 | -1.46538000 | -1.52018800 |
| H | -6.00079700 | -0.65269200 | 2.26545800  |
| H | -5.80805400 | -2.64808500 | 0.90615400  |
| H | -5.74787400 | -2.28698500 | -0.84327400 |
| H | -4.25172100 | -2.70672700 | 0.04486800  |

39H (Charge = 1, Multiplicity = 2):

|   |             |             |             |
|---|-------------|-------------|-------------|
| C | -1.85161700 | -0.63135000 | 0.10679500  |
| C | -2.50861300 | -1.89122200 | -0.02511800 |
| C | -3.87191400 | -2.00499200 | -0.26388500 |
| C | -4.55748300 | -0.81020100 | -0.36245000 |
| C | -3.91410600 | 0.46138700  | -0.22988200 |
| C | -2.52777500 | 0.55921100  | 0.00713100  |
| O | -5.86419800 | -0.63742600 | -0.61334900 |



|   |             |             |             |
|---|-------------|-------------|-------------|
| C | -6.15101900 | 0.75168900  | -0.57767000 |
| N | -4.86423600 | 1.38336200  | -0.38901900 |
| C | -7.05822300 | 1.00323800  | 0.63374300  |
| F | -8.21943300 | 0.37867700  | 0.47203400  |
| F | -7.27639500 | 2.30953100  | 0.76560600  |
| F | -6.47902000 | 0.55033700  | 1.74513000  |
| H | -0.78376600 | -0.62505600 | 0.29318500  |
| H | -1.91401200 | -2.79341800 | 0.06461000  |
| H | -4.37304700 | -2.95911100 | -0.36771300 |
| H | -2.04626800 | 1.52410500  | 0.10552900  |
| H | -6.65272700 | 1.07141100  | -1.49604900 |
| H | -4.72897900 | 2.39338100  | -0.39311000 |

40H (Charge = 1, Multiplicity = 2):

|   |             |             |             |
|---|-------------|-------------|-------------|
| C | -1.81128500 | -0.94060500 | 0.08267600  |
| C | -2.40992200 | -2.23058800 | 0.14405100  |
| C | -3.78040900 | -2.42834000 | 0.01672600  |
| C | -4.53079600 | -1.28587800 | -0.17314000 |
| C | -3.94713000 | 0.01321100  | -0.24197000 |
| C | -2.55535600 | 0.19839100  | -0.11113700 |
| O | -5.86246400 | -1.20194600 | -0.34434200 |
| C | -6.20801600 | 0.16696300  | -0.44988700 |
| N | -4.94222900 | 0.88166600  | -0.45346500 |
| C | -4.83658300 | 2.32411300  | -0.62126600 |
| C | -7.03209100 | 0.52660900  | 0.79492100  |
| F | -7.38750000 | 1.81005000  | 0.75564700  |
| F | -6.31448400 | 0.31580300  | 1.89836900  |
| F | -8.12600100 | -0.22508500 | 0.84636900  |
| H | -0.73600600 | -0.86339400 | 0.19562300  |
| H | -1.76822200 | -3.09114000 | 0.29687800  |
| H | -4.23798000 | -3.40859000 | 0.06175900  |
| H | -2.11549600 | 1.18736900  | -0.15514200 |
| H | -6.79176600 | 0.36025100  | -1.35604200 |
| H | -5.65266300 | 2.65980300  | -1.26071500 |
| H | -4.89830000 | 2.81357300  | 0.35423400  |
| H | -3.87866300 | 2.54550400  | -1.09123200 |

41H (Charge = 1, Multiplicity = 2):

|   |             |             |             |
|---|-------------|-------------|-------------|
| C | -5.28987700 | -2.34152600 | 0.53545100  |
| C | -6.66162000 | -2.17144900 | 0.46402900  |
| C | -7.23226200 | -0.90550600 | 0.28991100  |
| C | -6.40952800 | 0.23642000  | 0.20029100  |
| C | -4.99968600 | 0.06851700  | 0.23343300  |
| C | -4.43603500 | -1.22019400 | 0.39206200  |
| C | -6.93761600 | 1.54311200  | 0.15066900  |
| C | -6.08135700 | 2.64942300  | 0.18713500  |
| C | -4.70747400 | 2.49677700  | 0.25719400  |
| C | -4.14544500 | 1.19674600  | 0.25452300  |
| N | -2.81108900 | 1.00199600  | 0.32368200  |
| C | -2.21755600 | -0.27765800 | 0.01847200  |
| N | -3.09262700 | -1.33994500 | 0.45356500  |
| C | -1.96743500 | -0.38930000 | -1.49254600 |
| F | -1.41172900 | -1.56664900 | -1.79003200 |

|   |             |             |             |
|---|-------------|-------------|-------------|
| F | -1.15005100 | 0.58361400  | -1.90389700 |
| F | -3.11026000 | -0.28662900 | -2.18475200 |
| H | -4.85041800 | -3.32370700 | 0.67579200  |
| H | -7.30599800 | -3.03958300 | 0.54876400  |
| H | -8.31003000 | -0.78775800 | 0.25134500  |
| H | -8.01299800 | 1.68101500  | 0.11175900  |
| H | -6.50046500 | 3.64936500  | 0.16386600  |
| H | -4.04633700 | 3.35664800  | 0.28934000  |
| H | -2.19253500 | 1.80023800  | 0.41948200  |
| H | -1.24838900 | -0.36689400 | 0.51140900  |
| H | -2.67832500 | -2.24707300 | 0.63904900  |

42H (Charge = 1, Multiplicity = 2):

|   |             |             |             |
|---|-------------|-------------|-------------|
| C | -5.31171000 | -2.29368700 | 0.27559800  |
| C | -6.67471000 | -2.11136900 | 0.10540400  |
| C | -7.21883500 | -0.84053600 | -0.08219400 |
| C | -6.37990500 | 0.29361700  | -0.08594500 |
| C | -4.97730900 | 0.11993000  | 0.05098600  |
| C | -4.43463800 | -1.18045100 | 0.22495900  |
| C | -6.91034100 | 1.59931500  | -0.15028200 |
| C | -6.06565300 | 2.70315600  | -0.03097000 |
| C | -4.69891800 | 2.54964200  | 0.13741700  |
| C | -4.12699200 | 1.25211300  | 0.15522900  |
| N | -2.79436700 | 1.06018000  | 0.30738500  |
| C | -2.22763100 | -0.22982400 | -0.02634100 |
| N | -3.09496800 | -1.31670500 | 0.37655800  |
| C | -2.48239100 | -2.60175300 | 0.71112500  |
| C | -1.88151900 | 2.17331000  | 0.56423500  |
| C | -1.93496800 | -0.30767600 | -1.53266200 |
| F | -1.37746300 | -1.48358500 | -1.83971300 |
| F | -1.09247000 | 0.66679000  | -1.89144100 |
| F | -3.04757200 | -0.17769200 | -2.26571000 |
| H | -4.91328700 | -3.29167000 | 0.41028100  |
| H | -7.32653500 | -2.97804900 | 0.11675300  |
| H | -8.28905400 | -0.70780100 | -0.20145100 |
| H | -7.98075300 | 1.73136000  | -0.26833500 |
| H | -6.48089000 | 3.70411800  | -0.07182800 |
| H | -4.06328500 | 3.42279600  | 0.21691900  |
| H | -1.26646000 | -0.33740700 | 0.47964900  |
| H | -2.98645400 | -3.03385300 | 1.57721000  |
| H | -2.53850900 | -3.29578200 | -0.13240600 |
| H | -1.43617200 | -2.43057300 | 0.96179700  |
| H | -0.90423900 | 1.76750400  | 0.82147700  |
| H | -1.78238300 | 2.81155400  | -0.31846700 |
| H | -2.25117900 | 2.76302800  | 1.40476400  |

43H (Charge = 1, Multiplicity = 2):

|   |             |             |             |
|---|-------------|-------------|-------------|
| C | -4.93692200 | -0.54828700 | 0.29651900  |
| C | -3.75615300 | -1.07814400 | -0.32036700 |
| N | -3.69481800 | -2.38770800 | -0.43540100 |
| C | -4.59514700 | -3.37104900 | 0.12347400  |
| N | -5.67916100 | -2.83654300 | 0.70949900  |
| C | -6.08503500 | -1.46082600 | 0.57616100  |

|   |             |             |             |
|---|-------------|-------------|-------------|
| C | -2.61601200 | -0.27453800 | -0.82973400 |
| O | -4.28254300 | -4.53252100 | 0.06120000  |
| C | -5.16960300 | 0.88784100  | 0.64321800  |
| O | -6.09407300 | 1.20357900  | 1.35691600  |
| O | -4.29492900 | 1.71064700  | 0.10131100  |
| C | -3.34136600 | 3.85976500  | -0.26734700 |
| C | -4.46735100 | 3.12027600  | 0.41068700  |
| C | -7.10258900 | -1.35515000 | -0.58072900 |
| F | -7.51950900 | -0.10140600 | -0.74838500 |
| F | -8.15699300 | -2.12936600 | -0.33546400 |
| F | -6.54131500 | -1.76724700 | -1.72410200 |
| H | -2.87655200 | -2.80241900 | -0.88861700 |
| H | -6.33430600 | -3.48865100 | 1.13047600  |
| H | -6.60150000 | -1.12987300 | 1.48246900  |
| H | -2.97186500 | 0.42541200  | -1.58906800 |
| H | -2.19959600 | 0.31555000  | -0.00896200 |
| H | -1.85090800 | -0.92992400 | -1.24542300 |
| H | -3.44061800 | 4.92775200  | -0.05990000 |
| H | -2.37295000 | 3.52148400  | 0.10929400  |
| H | -3.37525500 | 3.71161900  | -1.34939300 |
| H | -5.44999700 | 3.42626800  | 0.04326700  |
| H | -4.44650900 | 3.23219500  | 1.49734000  |

44H (Charge = 1, Multiplicity = 2):

|   |             |             |             |
|---|-------------|-------------|-------------|
| C | -2.77014800 | -0.28096300 | -0.29866100 |
| C | -3.23737900 | 1.04405900  | -0.10914200 |
| N | -4.54988000 | 1.19292600  | -0.01653400 |
| C | -5.46383700 | 0.12149900  | -0.12365100 |
| N | -5.13155200 | -1.09159000 | -0.26714100 |
| C | -3.73306700 | -1.42233200 | -0.29102300 |
| C | -2.37478500 | 2.25045300  | -0.02630000 |
| C | -1.34698900 | -0.61332900 | -0.62170900 |
| O | -1.08145900 | -1.49175100 | -1.40783000 |
| O | -0.48132500 | 0.12968600  | 0.03972400  |
| C | 1.72394200  | 0.81077800  | 0.62556000  |
| C | 0.92201500  | -0.13518300 | -0.23250900 |
| C | -3.47058600 | -2.33357300 | 0.92672000  |
| F | -2.18867100 | -2.70958400 | 0.97632900  |
| F | -4.22505600 | -3.42616600 | 0.85989200  |
| F | -3.75653200 | -1.69777200 | 2.06647400  |
| O | -6.69536800 | 0.57645300  | -0.05868000 |
| C | -7.73912000 | -0.41356900 | -0.13735400 |
| H | -4.94016800 | 2.12893800  | 0.11842100  |
| H | -3.51384800 | -2.05133800 | -1.16782400 |
| H | -1.77986000 | 2.20137800  | 0.88987300  |
| H | -1.68166300 | 2.26550700  | -0.87073800 |
| H | -2.98092200 | 3.15577000  | -0.02518200 |
| H | 2.78797500  | 0.64138800  | 0.44472700  |
| H | 1.49087700  | 1.84984900  | 0.38017300  |
| H | 1.52031400  | 0.64016300  | 1.68530700  |
| H | 1.11838300  | -1.18340500 | 0.00559500  |
| H | 1.09365200  | 0.02147100  | -1.30023500 |
| H | -8.66785400 | 0.14602000  | -0.05617100 |

|   |             |             |             |
|---|-------------|-------------|-------------|
| H | -7.68113800 | -0.93591200 | -1.09360900 |
| H | -7.63810800 | -1.12321400 | 0.68554500  |

45H (Charge = 1, Multiplicity = 2):

|   |             |             |             |
|---|-------------|-------------|-------------|
| C | -4.93649700 | -0.51104700 | 0.31005600  |
| C | -3.76614800 | -1.04315900 | -0.30381800 |
| N | -3.65480000 | -2.36480700 | -0.31944400 |
| C | -4.45573500 | -3.29349800 | 0.38384300  |
| N | -5.55336900 | -2.77357400 | 0.92786500  |
| C | -6.05275300 | -1.44527200 | 0.64650700  |
| S | -3.92607700 | -4.85205000 | 0.51447500  |
| C | -2.67091400 | -0.24961300 | -0.91775600 |
| C | -7.03710200 | -1.52366500 | -0.53794700 |
| F | -7.53484200 | -0.32384800 | -0.82675500 |
| F | -8.03880600 | -2.35032200 | -0.24971500 |
| F | -6.40991200 | -1.99156200 | -1.62512700 |
| C | -5.20622300 | 0.93397400  | 0.58082000  |
| O | -6.21137300 | 1.26897600  | 1.16540900  |
| O | -4.26457700 | 1.73993000  | 0.13469800  |
| C | -3.25906700 | 3.87583000  | -0.16481800 |
| C | -4.46662100 | 3.15761200  | 0.38328200  |
| H | -2.84153300 | -2.77269300 | -0.78651600 |
| H | -6.13858000 | -3.38977000 | 1.48604000  |
| H | -6.61200100 | -1.06806500 | 1.50655000  |
| H | -3.08013300 | 0.43760700  | -1.66067700 |
| H | -2.19292300 | 0.35256900  | -0.13955500 |
| H | -1.93666100 | -0.91190100 | -1.37534500 |
| H | -3.37760500 | 4.94922800  | 0.00016200  |
| H | -2.34874900 | 3.54546400  | 0.34139100  |
| H | -3.15531900 | 3.69876700  | -1.23807100 |
| H | -5.39320700 | 3.45643200  | -0.11305200 |
| H | -4.58310800 | 3.29743600  | 1.46076300  |

46H (Charge = 1, Multiplicity = 2):

|   |             |             |             |
|---|-------------|-------------|-------------|
| C | -5.69590900 | -3.52634400 | 0.74227900  |
| C | -5.86172800 | -3.11193200 | 2.06934500  |
| C | -6.12972000 | -1.78483400 | 2.34971900  |
| C | -6.23106200 | -0.89155200 | 1.27724200  |
| C | -6.08509200 | -1.28212500 | -0.06265100 |
| C | -5.81246800 | -2.61917100 | -0.31377600 |
| O | -6.44432000 | 0.40730200  | 1.61639000  |
| C | -6.38630200 | 1.39601700  | 0.72694700  |
| C | -6.23455500 | 1.14120400  | -0.65942300 |
| C | -6.31355800 | -0.27573400 | -1.15881800 |
| C | -6.44580800 | 2.70265400  | 1.26197500  |
| C | -6.32591500 | 3.76638700  | 0.39942600  |
| C | -6.14713700 | 3.53362500  | -0.97636600 |
| C | -6.10979200 | 2.23044800  | -1.49742700 |
| C | -7.71178700 | -0.50397100 | -1.74725400 |
| F | -7.84037400 | -1.74281000 | -2.22933900 |
| F | -7.96773000 | 0.34773800  | -2.74426400 |
| F | -8.65507800 | -0.32974100 | -0.81019200 |
| H | -5.47580800 | -4.56625200 | 0.52713600  |

|   |             |             |             |
|---|-------------|-------------|-------------|
| H | -5.77230100 | -3.82737400 | 2.87866700  |
| H | -6.25010200 | -1.41489800 | 3.36191000  |
| H | -5.69062800 | -2.95390000 | -1.33852200 |
| H | -5.61008700 | -0.43185800 | -1.98359400 |
| H | -6.56624800 | 2.82419900  | 2.33279400  |
| H | -6.35856600 | 4.78145600  | 0.77692300  |
| H | -6.04058800 | 4.37505000  | -1.65208300 |
| H | -5.98410100 | 2.07566900  | -2.56370100 |

47H (Charge = 1, Multiplicity = 2):

|   |             |             |             |
|---|-------------|-------------|-------------|
| C | -7.36666100 | 0.11842400  | 0.81632500  |
| C | -7.29802800 | 1.49430900  | 0.58115900  |
| C | -6.10298700 | 2.06276400  | 0.18168200  |
| C | -4.97017400 | 1.23801800  | 0.02238600  |
| C | -5.03253100 | -0.15478600 | 0.23707100  |
| C | -6.24511900 | -0.69581300 | 0.63707800  |
| S | -3.51141000 | 2.05680700  | -0.39875900 |
| C | -2.25114900 | 0.91421600  | -0.11016900 |
| C | -2.49614100 | -0.45727800 | 0.11016200  |
| C | -3.86625700 | -1.05920800 | -0.07155000 |
| C | -0.94695200 | 1.44906300  | -0.06674400 |
| C | 0.11433800  | 0.61105400  | 0.22020400  |
| C | -0.11867000 | -0.74615300 | 0.45889400  |
| C | -1.41162300 | -1.27268500 | 0.39672700  |
| C | -3.99784100 | -1.52561500 | -1.52716300 |
| F | -5.16481300 | -2.14104700 | -1.73688000 |
| F | -3.02391800 | -2.37814300 | -1.85637600 |
| F | -3.92988900 | -0.48594300 | -2.37536400 |
| H | -8.30168100 | -0.32858200 | 1.13632200  |
| H | -8.17406700 | 2.11798000  | 0.71623400  |
| H | -6.02753600 | 3.13162900  | 0.00618400  |
| H | -6.31609600 | -1.76559900 | 0.80611200  |
| H | -3.94380300 | -1.96776500 | 0.53311300  |
| H | -0.78610000 | 2.50887900  | -0.24082800 |
| H | 1.12081300  | 1.01058400  | 0.26527300  |
| H | 0.71221800  | -1.40365600 | 0.69082800  |
| H | -1.57772900 | -2.33145900 | 0.56808000  |

## Coordinate of Transition States

1H (Charge = 1, Multiplicity = 2):

|   |             |             |             |
|---|-------------|-------------|-------------|
| C | -2.04118000 | 0.64576800  | 0.41417900  |
| C | -2.58343200 | 1.64788900  | -0.37820600 |
| N | -3.71428000 | 1.34312100  | -1.06102000 |
| C | -4.39316100 | 0.16987600  | -1.04120400 |
| C | -3.86339100 | -0.84717900 | -0.25863500 |
| C | -2.65126600 | -0.62612200 | 0.42835900  |
| C | -2.05376200 | 3.03310200  | -0.55935100 |
| C | -5.63768000 | 0.11269100  | -1.86520500 |
| C | -4.42579700 | -2.22633900 | -0.14220300 |
| O | -3.76384500 | -3.14019200 | 0.29919200  |
| O | -5.67872600 | -2.33008200 | -0.55579700 |
| C | -7.66569700 | -3.54216400 | -1.04017500 |
| C | -6.26516700 | -3.65247400 | -0.48885600 |
| C | -0.78091700 | 0.76254900  | 1.20776100  |
| O | -0.19549900 | -0.22100800 | 1.60531900  |
| O | -0.39801500 | 2.01083200  | 1.42477700  |
| C | 1.09313900  | 3.66096700  | 2.26791700  |
| C | 0.83016900  | 2.17792500  | 2.17426000  |
| C | -1.22676500 | -1.80168000 | -0.82464900 |
| F | -0.70839500 | -2.73487200 | -0.06845200 |
| F | -0.31534200 | -0.96010600 | -1.25537000 |
| F | -1.91476700 | -2.30841700 | -1.82167900 |
| H | -4.10304900 | 2.08403000  | -1.64432400 |
| H | -2.34365400 | -1.34172000 | 1.18671800  |
| H | -0.99548400 | 2.99769400  | -0.82193800 |
| H | -2.60582700 | 3.55499300  | -1.34230000 |
| H | -2.14354500 | 3.58794900  | 0.37737700  |
| H | -5.75340700 | 1.02772900  | -2.44690000 |
| H | -5.60272200 | -0.74510500 | -2.53879900 |
| H | -6.50573700 | -0.01314600 | -1.21456000 |
| H | -8.14501900 | -4.52334700 | -1.00650100 |
| H | -8.26190800 | -2.84413100 | -0.44728700 |
| H | -7.64759000 | -3.20024400 | -2.07807000 |
| H | -5.64156400 | -4.33377000 | -1.07319200 |
| H | -6.25413900 | -3.97898900 | 0.55412100  |
| H | 2.01417400  | 3.82855000  | 2.83121000  |
| H | 1.21084100  | 4.09745500  | 1.27287800  |
| H | 0.27404000  | 4.16842200  | 2.78338900  |
| H | 0.69609900  | 1.71761100  | 3.15648600  |
| H | 1.62777700  | 1.64757900  | 1.64797600  |

2H (Charge = 1, Multiplicity = 2):

|   |             |             |             |
|---|-------------|-------------|-------------|
| C | -4.01226500 | 0.20183200  | 1.15088400  |
| C | -4.28481600 | 1.28270400  | 0.31905500  |
| N | -5.25328100 | 1.12165800  | -0.60913700 |
| C | -6.00084300 | 0.01164400  | -0.79096900 |
| C | -5.73436200 | -1.07753000 | 0.03253700  |
| C | -4.68347600 | -1.02718500 | 0.97281200  |
| C | -3.57778900 | 2.58838200  | 0.39075000  |
| C | -7.06775700 | 0.02258900  | -1.82695200 |

|   |             |             |             |
|---|-------------|-------------|-------------|
| C | -6.51237200 | -2.27121600 | -0.12021800 |
| N | -7.13887800 | -3.23439100 | -0.24878200 |
| C | -2.99420200 | 0.33092400  | 2.15137000  |
| N | -2.16813300 | 0.43508100  | 2.95356600  |
| C | -3.07252000 | -2.17764100 | -0.17850300 |
| F | -3.51271100 | -3.40330300 | -0.31720300 |
| F | -1.98217200 | -2.11916700 | 0.54565700  |
| F | -2.93036400 | -1.57283800 | -1.33139600 |
| H | -5.45088100 | 1.92066100  | -1.21545400 |
| H | -4.57955000 | -1.81644400 | 1.71409600  |
| H | -4.08762100 | 3.34210500  | -0.20899900 |
| H | -3.52064800 | 2.92370600  | 1.42872200  |
| H | -2.55602100 | 2.46087100  | 0.01862200  |
| H | -7.09194400 | 0.97232800  | -2.36155200 |
| H | -6.89388100 | -0.79192400 | -2.53564500 |
| H | -8.03579700 | -0.14945200 | -1.34674700 |

3H (Charge = 1, Multiplicity = 2):

|   |             |             |             |
|---|-------------|-------------|-------------|
| C | -3.72377700 | 0.49164400  | 0.64975600  |
| C | -4.25779000 | 1.48918900  | -0.15425300 |
| N | -5.37508000 | 1.18290900  | -0.85840900 |
| C | -6.06266600 | 0.01452800  | -0.84082500 |
| C | -5.55130900 | -1.00817600 | -0.05273700 |
| C | -4.33660500 | -0.78136400 | 0.63316600  |
| C | -3.72344500 | 2.87181700  | -0.34977000 |
| C | -7.28743800 | -0.03220800 | -1.69680600 |
| C | -6.11596700 | -2.40020300 | 0.07882500  |
| O | -5.34410700 | -3.27583900 | 0.42183800  |
| C | -7.57059200 | -2.68147500 | -0.16203000 |
| C | -2.47245100 | 0.59623100  | 1.48385300  |
| O | -1.88710600 | -0.44162800 | 1.72905500  |
| C | -2.00230200 | 1.91525000  | 2.02485500  |
| C | -2.90680400 | -1.90812400 | -0.67262800 |
| F | -2.36819800 | -2.86690000 | 0.03624200  |
| F | -2.00716400 | -1.04397900 | -1.08596700 |
| F | -3.60076900 | -2.38181300 | -1.68295400 |
| H | -5.74551500 | 1.91986700  | -1.45766300 |
| H | -4.02249100 | -1.51162100 | 1.37401100  |
| H | -2.66184200 | 2.83443600  | -0.59941900 |
| H | -4.25491700 | 3.37694800  | -1.15786500 |
| H | -3.84370900 | 3.45762200  | 0.56492400  |
| H | -7.38099900 | 0.88384700  | -2.28126900 |
| H | -7.23828100 | -0.88013300 | -2.38253500 |
| H | -8.18065300 | -0.13879300 | -1.07716500 |
| H | -7.80037200 | -3.66217900 | 0.25480400  |
| H | -8.20288800 | -1.91776300 | 0.29687800  |
| H | -7.77849400 | -2.69741200 | -1.23594700 |
| H | -1.30410800 | 1.71910200  | 2.83891600  |
| H | -1.48068800 | 2.47692300  | 1.24390800  |
| H | -2.83921500 | 2.52069800  | 2.38050600  |

4H (Charge = 1, Multiplicity = 2):

|   |             |            |            |
|---|-------------|------------|------------|
| C | -3.78849200 | 0.48240600 | 0.67679000 |
|---|-------------|------------|------------|

|   |             |             |             |
|---|-------------|-------------|-------------|
| C | -4.30615900 | 1.46729800  | -0.14903200 |
| N | -5.40714900 | 1.15029600  | -0.87527800 |
| C | -6.09577500 | -0.01754300 | -0.83945400 |
| C | -5.60310200 | -1.01733900 | -0.01681000 |
| C | -4.37733100 | -0.80142200 | 0.65050500  |
| C | -3.76985900 | 2.85078600  | -0.33623200 |
| C | -7.30829500 | -0.09426200 | -1.71124700 |
| C | -6.17875500 | -2.40162300 | 0.12363500  |
| O | -5.41022900 | -3.34320100 | 0.27556400  |
| N | -7.51778000 | -2.52037300 | 0.08548500  |
| C | -2.53740800 | 0.59688400  | 1.50738400  |
| O | -1.83001500 | -0.39475800 | 1.63675400  |
| N | -2.27242600 | 1.78805100  | 2.07232600  |
| C | -2.99251100 | -1.83758100 | -0.74537600 |
| F | -2.42054500 | -2.82194300 | -0.10007400 |
| F | -2.11502800 | -0.94761900 | -1.15272500 |
| F | -3.71225100 | -2.27136800 | -1.75603900 |
| H | -5.76277600 | 1.87028400  | -1.50437200 |
| H | -4.04399700 | -1.53976100 | 1.37497700  |
| H | -2.68085000 | 2.85158900  | -0.28996900 |
| H | -4.08965800 | 3.25519300  | -1.29851800 |
| H | -4.15262900 | 3.50674300  | 0.45267000  |
| H | -7.22234700 | 0.60998700  | -2.54098100 |
| H | -7.43459000 | -1.10170200 | -2.10690900 |
| H | -8.20072000 | 0.16753200  | -1.13301600 |
| H | -8.12916000 | -1.71929700 | 0.15864000  |
| H | -7.91659400 | -3.43700000 | 0.24269400  |
| H | -2.95987600 | 2.52670300  | 2.11674200  |
| H | -1.46978600 | 1.85136600  | 2.68544300  |

5H (Charge = 1, Multiplicity = 2):

|   |             |             |             |
|---|-------------|-------------|-------------|
| C | -2.01455000 | 0.85099400  | 0.36195200  |
| C | -2.48710800 | 1.84115700  | -0.47117100 |
| N | -3.58375300 | 1.60682800  | -1.21526200 |
| C | -4.26576800 | 0.44690600  | -1.19377800 |
| C | -3.83331500 | -0.57321700 | -0.37602200 |
| C | -2.66588100 | -0.39923700 | 0.39575900  |
| C | -4.50560000 | -1.90539400 | -0.33973300 |
| O | -3.98994700 | -2.86256300 | 0.19139700  |
| O | -5.67743800 | -1.90113000 | -0.95407200 |
| C | -7.67200500 | -2.94338800 | -1.73314300 |
| C | -6.37369100 | -3.17171000 | -0.99942400 |
| C | -0.77906000 | 1.01789100  | 1.18337500  |
| O | -0.25954200 | 0.08196000  | 1.74740400  |
| O | -0.34210600 | 2.26666700  | 1.19582900  |
| C | 1.17658000  | 3.98178100  | 1.84340700  |
| C | 0.87482800  | 2.50706500  | 1.94527800  |
| C | -1.20650100 | -1.70112400 | -0.74878400 |
| F | -1.84623100 | -2.13490700 | -1.80831200 |
| F | -0.84772500 | -2.67858100 | 0.04218500  |
| F | -0.19320000 | -0.93542100 | -1.07515100 |
| H | -2.03298300 | 2.81974100  | -0.56593200 |
| H | -3.92149200 | 2.35302800  | -1.82347700 |



|   |             |             |             |
|---|-------------|-------------|-------------|
| H | -5.14039300 | 0.38117300  | -1.82911300 |
| H | -2.43108600 | -1.10600700 | 1.18801400  |
| H | -8.22415900 | -3.88463100 | -1.78641400 |
| H | -8.28874700 | -2.20846500 | -1.21029000 |
| H | -7.48635800 | -2.59211600 | -2.75103300 |
| H | -5.73065700 | -3.89404000 | -1.50894400 |
| H | -6.53216100 | -3.50959900 | 0.02771700  |
| H | 2.09206200  | 4.20017500  | 2.39824000  |
| H | 1.32355200  | 4.27688100  | 0.80165000  |
| H | 0.36318500  | 4.57406800  | 2.26937400  |
| H | 0.70767100  | 2.18895200  | 2.97730400  |
| H | 1.66774100  | 1.89054800  | 1.51405300  |

6H (Charge = 1, Multiplicity = 2):

|   |             |             |             |
|---|-------------|-------------|-------------|
| C | -2.40723200 | 0.69120600  | 0.96131600  |
| C | -2.95777900 | 1.69056700  | 0.17110200  |
| N | -4.07105000 | 1.39616400  | -0.57073800 |
| C | -4.74487300 | 0.20684800  | -0.48478100 |
| C | -4.20808600 | -0.80132400 | 0.30392100  |
| C | -3.00344900 | -0.57961100 | 0.99006600  |
| C | -2.44463400 | 3.09652700  | 0.14418000  |
| C | -6.06252200 | 0.09272000  | -1.18531300 |
| C | -4.57588200 | 2.42215100  | -1.51126500 |
| C | -4.77159500 | -2.18645100 | 0.43703000  |
| O | -4.63034400 | -2.84067400 | 1.44390900  |
| O | -5.34315000 | -2.62494900 | -0.67610000 |
| C | -6.49267100 | -4.25670900 | -1.97096500 |
| C | -5.85330400 | -3.98008600 | -0.63235800 |
| C | -1.13712800 | 0.81393600  | 1.75236600  |
| O | -0.95092900 | 0.18136400  | 2.76574300  |
| O | -0.23860700 | 1.59850300  | 1.17358100  |
| C | 1.89575400  | 2.63942600  | 1.03534300  |
| C | 1.04113300  | 1.69530700  | 1.84493100  |
| C | -1.58786200 | -1.66736200 | -0.40264800 |
| F | -1.95381300 | -2.92987100 | -0.41096500 |
| F | -0.37645700 | -1.51075600 | 0.08426300  |
| F | -1.70351400 | -1.12384000 | -1.59144400 |
| H | -2.67403700 | -1.30239000 | 1.73372700  |
| H | -1.82923000 | 3.28155100  | 1.02015100  |
| H | -1.83332800 | 3.26933100  | -0.74777000 |
| H | -3.27467400 | 3.80463200  | 0.14168600  |
| H | -6.62428800 | 1.02331000  | -1.09219200 |
| H | -5.91813400 | -0.12531900 | -2.24874400 |
| H | -6.64520900 | -0.71356800 | -0.74915800 |
| H | -3.73521300 | 2.99817100  | -1.88557700 |
| H | -5.05263500 | 1.92667600  | -2.35107100 |
| H | -5.28771000 | 3.07455000  | -1.00132700 |
| H | -6.88512200 | -5.27631000 | -1.97862800 |
| H | -7.31889100 | -3.56576400 | -2.15655800 |
| H | -5.76178300 | -4.16018400 | -2.77745800 |
| H | -5.01473400 | -4.65057500 | -0.42620700 |
| H | -6.56769000 | -4.05332500 | 0.19142600  |
| H | 2.87514400  | 2.73554100  | 1.50990400  |

|   |            |            |            |
|---|------------|------------|------------|
| H | 2.03739600 | 2.26007900 | 0.02046600 |
| H | 1.43698100 | 3.62998900 | 0.98284800 |
| H | 0.87109800 | 2.05750700 | 2.86191200 |
| H | 1.47073800 | 0.69146000 | 1.90024300 |

7H (Charge = 1, Multiplicity = 2):

|   |             |             |             |
|---|-------------|-------------|-------------|
| C | -2.04535400 | 0.59175900  | 0.56060600  |
| C | -2.59074800 | 1.59765600  | -0.20978800 |
| N | -3.72878400 | 1.39053200  | -0.90130700 |
| C | -4.36883800 | 0.20128900  | -0.86025100 |
| C | -3.86883800 | -0.83771500 | -0.10938700 |
| C | -2.66174400 | -0.67199800 | 0.59863500  |
| C | -4.29641700 | 2.46455000  | -1.74106900 |
| C | -4.51523900 | -2.18361000 | -0.08709400 |
| O | -3.96707900 | -3.14341100 | 0.40535100  |
| O | -5.70273400 | -2.18932500 | -0.67095900 |
| C | -7.68535100 | -3.25724500 | -1.44474500 |
| C | -6.37592900 | -3.47149700 | -0.72658600 |
| C | -0.76290500 | 0.77018400  | 1.30417300  |
| O | -0.19252200 | -0.16230500 | 1.82300800  |
| O | -0.34455900 | 2.02605600  | 1.30326800  |
| C | 1.19140700  | 3.75642100  | 1.86294600  |
| C | 0.91290800  | 2.27798600  | 1.97763600  |
| C | -1.24570700 | -1.89930000 | -0.68658000 |
| F | -0.27180000 | -1.09762400 | -1.04805000 |
| F | -1.94169800 | -2.30972700 | -1.72064500 |
| F | -0.81237400 | -2.89824900 | 0.03875900  |
| H | -2.14602900 | 2.58258300  | -0.28691800 |
| H | -5.28223600 | 0.12511600  | -1.43901800 |
| H | -2.36385900 | -1.40153500 | 1.34738400  |
| H | -5.34730700 | 2.58487000  | -1.48109000 |
| H | -3.75016000 | 3.38448700  | -1.54656900 |
| H | -4.19349600 | 2.17496300  | -2.78697100 |
| H | -8.22163500 | -4.20724800 | -1.50419700 |
| H | -8.30965600 | -2.53935600 | -0.90739500 |
| H | -7.51563100 | -2.89075400 | -2.46006400 |
| H | -5.72534900 | -4.17551500 | -1.25177100 |
| H | -6.51807800 | -3.82552300 | 0.29757600  |
| H | 2.13536300  | 3.98399500  | 2.36375500  |
| H | 1.27351400  | 4.05579200  | 0.81527400  |
| H | 0.39784100  | 4.33835500  | 2.33778500  |
| H | 0.81284000  | 1.95487200  | 3.01686900  |
| H | 1.68527700  | 1.67215700  | 1.49679000  |

8H (Charge = 1, Multiplicity = 2):

|   |             |             |             |
|---|-------------|-------------|-------------|
| C | -4.95289900 | 0.75447700  | 0.76321000  |
| C | -5.34030100 | 1.75785500  | -0.10396800 |
| N | -6.38071500 | 1.54484400  | -0.92579800 |
| C | -7.10329300 | 0.41285300  | -0.94072300 |
| C | -6.75202600 | -0.61990300 | -0.09297600 |
| C | -5.60456700 | -0.50264100 | 0.72820300  |
| C | -7.53126200 | -1.82511400 | -0.08690100 |
| N | -8.15095800 | -2.80027400 | -0.07577700 |

|   |             |             |             |
|---|-------------|-------------|-------------|
| C | -3.85261400 | 0.97720500  | 1.65676700  |
| N | -2.96647600 | 1.14401000  | 2.37935500  |
| C | -4.07770600 | -1.63384400 | -0.56374600 |
| F | -2.90977200 | -1.14774100 | -0.22601200 |
| F | -4.38935100 | -1.35011500 | -1.80328000 |
| F | -4.17716800 | -2.91101900 | -0.30637000 |
| H | -4.85873000 | 2.72666200  | -0.15315700 |
| H | -6.65622200 | 2.29853900  | -1.55843000 |
| H | -7.94745200 | 0.37305300  | -1.61871700 |
| H | -5.40290800 | -1.24270900 | 1.49848300  |

9H (Charge = 1, Multiplicity = 2):

|   |             |             |             |
|---|-------------|-------------|-------------|
| C | -4.15148900 | 0.92020400  | 0.32283200  |
| C | -4.73319900 | 1.74846100  | -0.61095700 |
| N | -5.83690600 | 1.33758300  | -1.26427000 |
| C | -6.43770400 | 0.15214200  | -1.04549200 |
| C | -5.89983300 | -0.71838300 | -0.12393200 |
| C | -4.69358800 | -0.36829500 | 0.52062200  |
| C | -6.44620700 | -2.09450900 | 0.14537200  |
| O | -5.67975400 | -2.95895900 | 0.55048300  |
| N | -7.75180600 | -2.28713200 | -0.10394400 |
| C | -2.87841400 | 1.24645100  | 1.05657900  |
| O | -2.18984500 | 0.32246300  | 1.46990600  |
| N | -2.56682700 | 2.54685900  | 1.18497800  |
| C | -3.22431700 | -1.60458600 | -0.66184900 |
| F | -2.35978900 | -0.76453100 | -1.18248500 |
| F | -3.90831400 | -2.21600700 | -1.60109100 |
| F | -2.65216900 | -2.45026700 | 0.15506000  |
| H | -4.36071900 | 2.72940700  | -0.88128700 |
| H | -6.24127000 | 1.95996300  | -1.96319000 |
| H | -7.32519200 | -0.04739600 | -1.63425500 |
| H | -4.33635700 | -0.97514000 | 1.34840000  |
| H | -8.39099200 | -1.52132900 | -0.26396600 |
| H | -8.14456300 | -3.19931400 | 0.08826100  |
| H | -3.23403500 | 3.28307800  | 1.00236300  |
| H | -1.72879500 | 2.78603300  | 1.69868400  |

10H (Charge = 1, Multiplicity = 2):

|   |             |             |             |
|---|-------------|-------------|-------------|
| C | -2.16393300 | 2.00512900  | 1.09045200  |
| C | -2.68460900 | 2.95009500  | 0.23918500  |
| N | -3.74916000 | 2.64291500  | -0.53241300 |
| C | -4.35805300 | 1.44499200  | -0.51182900 |
| C | -3.87402400 | 0.46072400  | 0.32010400  |
| C | -2.72292500 | 0.70950600  | 1.10517500  |
| C | -4.46348800 | -0.90848300 | 0.34574500  |
| O | -3.90557300 | -1.83568400 | 0.88835900  |
| O | -5.62150200 | -0.97651600 | -0.29438800 |
| C | -7.53740800 | -2.13157500 | -1.10730400 |
| C | -6.24449700 | -2.28286400 | -0.34411000 |
| C | -1.23092200 | -0.46627500 | -0.07899100 |
| F | -0.83932900 | -1.47369800 | 0.66195800  |
| F | -0.23651800 | 0.34360800  | -0.35833600 |
| F | -1.83928500 | -0.87391800 | -1.16913600 |

|   |             |             |             |
|---|-------------|-------------|-------------|
| H | -1.32385800 | 2.25835600  | 1.72440000  |
| H | -2.30476300 | 3.95982300  | 0.15174000  |
| H | -4.12097400 | 3.36230800  | -1.15138500 |
| H | -5.21723100 | 1.31859500  | -1.15849600 |
| H | -2.46716000 | 0.01072400  | 1.89754500  |
| H | -8.03670200 | -3.10163800 | -1.16493600 |
| H | -8.20456700 | -1.42742900 | -0.60424700 |
| H | -7.34892600 | -1.77764800 | -2.12379400 |
| H | -5.55303900 | -2.97350200 | -0.83383400 |
| H | -6.40742900 | -2.62262300 | 0.68186000  |

11H (Charge = 1, Multiplicity = 2):

|   |             |             |             |
|---|-------------|-------------|-------------|
| C | -4.89467900 | 1.06712600  | 0.53851700  |
| C | -5.57687200 | 1.82185100  | -0.38493900 |
| N | -6.73321600 | 1.35697500  | -0.90663500 |
| C | -7.28858000 | 0.18911700  | -0.55639400 |
| C | -6.64494600 | -0.60555300 | 0.37398700  |
| C | -5.38245400 | -0.20860300 | 0.88575000  |
| C | -7.23746200 | -1.85035200 | 0.77074100  |
| N | -7.70351300 | -2.85649100 | 1.09776100  |
| C | -4.01585600 | -1.46235100 | -0.43092600 |
| F | -3.91397700 | -0.83177400 | -1.57606400 |
| F | -4.61537800 | -2.62182400 | -0.56541900 |
| F | -2.85662000 | -1.57533000 | 0.16824000  |
| H | -3.97197400 | 1.44038600  | 0.96430500  |
| H | -5.25412600 | 2.79739600  | -0.72490600 |
| H | -7.22148500 | 1.93441100  | -1.59156600 |
| H | -8.23538000 | -0.06918900 | -1.01449800 |
| H | -4.94765900 | -0.75784500 | 1.71701300  |

12H (Charge = 1, Multiplicity = 2):

|   |             |             |             |
|---|-------------|-------------|-------------|
| C | -3.73995100 | 1.39652300  | 0.83569900  |
| C | -4.27929700 | 2.32885800  | -0.01838600 |
| N | -5.37644700 | 2.01738300  | -0.73929100 |
| C | -6.00113400 | 0.82856200  | -0.66389600 |
| C | -5.50151500 | -0.15003000 | 0.16791300  |
| C | -4.31624700 | 0.11135800  | 0.90046600  |
| C | -6.10729200 | -1.52128600 | 0.25841700  |
| O | -5.47259000 | -2.38530000 | 0.83124700  |
| C | -7.44369900 | -1.76808300 | -0.37695300 |
| C | -2.88073400 | -1.11236500 | -0.31751700 |
| F | -3.52821900 | -1.52206400 | -1.38424900 |
| F | -2.47948500 | -2.11843100 | 0.42032100  |
| F | -1.88254400 | -0.32140200 | -0.63748700 |
| H | -2.87275600 | 1.65251500  | 1.43109500  |
| H | -3.88991500 | 3.33068700  | -0.14612700 |
| H | -5.76289100 | 2.72644800  | -1.36094800 |
| H | -6.88691800 | 0.71441700  | -1.27701300 |
| H | -4.03377600 | -0.57549600 | 1.69402800  |
| H | -7.76613000 | -2.78336900 | -0.14920700 |
| H | -8.18044700 | -1.04628600 | -0.01262400 |
| H | -7.36355800 | -1.64541800 | -1.46228200 |

13H (Charge = 1, Multiplicity = 2):

|   |             |             |             |
|---|-------------|-------------|-------------|
| C | -4.26099900 | 1.50086700  | 0.47550800  |
| C | -4.90452000 | 2.21791200  | -0.50462400 |
| N | -5.97250200 | 1.68146100  | -1.12983000 |
| C | -6.48025700 | 0.47224500  | -0.82577900 |
| C | -5.88336600 | -0.28642800 | 0.15490800  |
| C | -4.70016800 | 0.19238600  | 0.77062700  |
| C | -6.33642500 | -1.67531600 | 0.50843500  |
| O | -5.51005400 | -2.47174600 | 0.93558700  |
| N | -7.63359000 | -1.96097700 | 0.30018400  |
| C | -3.20415400 | -1.03802600 | -0.33925900 |
| F | -2.65223400 | -1.88188000 | 0.49706700  |
| F | -2.31861100 | -0.18738300 | -0.81190000 |
| F | -3.83334500 | -1.65374900 | -1.31250900 |
| H | -3.41086800 | 1.93402700  | 0.98678800  |
| H | -4.61679500 | 3.21458200  | -0.81335900 |
| H | -6.42729600 | 2.22440900  | -1.86271600 |
| H | -7.34841100 | 0.16076200  | -1.39391200 |
| H | -4.32247900 | -0.32765100 | 1.64719700  |
| H | -8.32439500 | -1.24259500 | 0.13438800  |
| H | -7.96352000 | -2.88319100 | 0.55315100  |

14H (Charge = 1, Multiplicity = 2):

|   |             |             |             |
|---|-------------|-------------|-------------|
| C | -4.49785000 | 0.93420100  | 1.25286400  |
| C | -5.06426300 | 1.83817600  | 0.38838300  |
| N | -5.99741600 | 1.44815700  | -0.51189200 |
| C | -6.42292700 | 0.16942000  | -0.56761800 |
| C | -5.90170000 | -0.78320500 | 0.28041900  |
| C | -4.85984100 | -0.42550900 | 1.16606800  |
| C | -6.53825000 | 2.44985200  | -1.44874100 |
| C | -6.28693000 | -2.23510200 | 0.21963600  |
| O | -5.46605000 | -3.07378200 | 0.57002600  |
| N | -7.51496400 | -2.52304300 | -0.24584400 |
| C | -3.12500400 | -1.29214600 | 0.04496200  |
| F | -2.24377600 | -0.32032100 | -0.06832500 |
| F | -3.55862200 | -1.67434900 | -1.13385000 |
| F | -2.63739900 | -2.29467000 | 0.73438200  |
| H | -3.76423600 | 1.27498400  | 1.97246700  |
| H | -4.81264200 | 2.89205200  | 0.38503900  |
| H | -7.18071400 | -0.04736500 | -1.31205000 |
| H | -4.56397700 | -1.12784100 | 1.94046400  |
| H | -6.80226800 | 3.34364100  | -0.88460200 |
| H | -5.77349800 | 2.68328000  | -2.19004100 |
| H | -7.42009800 | 2.03663900  | -1.93288500 |
| H | -8.23363400 | -1.82005500 | -0.34560200 |
| H | -7.79739800 | -3.49418300 | -0.26669300 |

15H (Charge = 1, Multiplicity = 2):

|   |             |             |             |
|---|-------------|-------------|-------------|
| C | -5.14659000 | 0.42051400  | 1.14428500  |
| C | -5.34003500 | 1.57083200  | 0.41747900  |
| N | -6.20646900 | 1.56864200  | -0.61565800 |
| C | -6.92946200 | 0.48799900  | -0.97306100 |
| C | -6.77585500 | -0.69026400 | -0.28239500 |

|   |             |             |             |
|---|-------------|-------------|-------------|
| C | -5.81758400 | -0.75984900 | 0.75319400  |
| C | -4.14890000 | -1.76930200 | -0.36477900 |
| F | -3.94497200 | -1.07385100 | -1.46155000 |
| F | -4.53025100 | -2.99612600 | -0.64075800 |
| F | -3.08994700 | -1.75628600 | 0.41365300  |
| H | -4.45988700 | 0.42375000  | 1.98138700  |
| H | -4.84598800 | 2.51019200  | 0.62999600  |
| H | -6.33923000 | 2.43325700  | -1.13759200 |
| H | -7.61909600 | 0.62050400  | -1.79656400 |
| H | -7.36176500 | -1.55688000 | -0.56191200 |
| H | -5.78997400 | -1.63219900 | 1.40134800  |

16H (Charge = 1, Multiplicity = 2):

|   |             |             |             |
|---|-------------|-------------|-------------|
| C | -2.78807400 | 1.41774500  | -0.18613700 |
| C | -2.23179600 | 0.13199700  | 0.00882200  |
| C | -3.02359900 | -0.99208400 | 0.00246200  |
| C | -4.40777500 | -0.83897500 | -0.20025400 |
| C | -4.98344100 | 0.43592000  | -0.40233200 |
| C | -4.13917000 | 1.56997000  | -0.38521400 |
| N | -5.23606200 | -1.93403800 | -0.22411500 |
| C | -6.54767700 | -1.86447000 | -0.44064500 |
| C | -7.16547200 | -0.63593900 | -0.64331300 |
| C | -6.40090300 | 0.52725300  | -0.56462500 |
| C | -6.89196500 | 1.16965900  | 1.60398900  |
| F | -8.19825600 | 1.22138900  | 1.73026800  |
| F | -6.33898000 | 2.34656200  | 1.79663000  |
| F | -6.36799000 | 0.25907400  | 2.39374600  |
| H | -2.13898400 | 2.28639900  | -0.17478300 |
| H | -1.16327400 | 0.03137800  | 0.16635200  |
| H | -2.61121600 | -1.98508600 | 0.14984400  |
| H | -4.58187200 | 2.55055800  | -0.52996700 |
| H | -4.81459000 | -2.85195100 | -0.08672600 |
| H | -7.08234100 | -2.80589900 | -0.46117000 |
| H | -8.23134700 | -0.60077300 | -0.82702600 |
| H | -6.83473300 | 1.48616200  | -0.83999100 |

17H (Charge = 1, Multiplicity = 2):

|   |             |             |             |
|---|-------------|-------------|-------------|
| C | -0.69939300 | 1.22646700  | -0.01484400 |
| C | -0.21529600 | -0.09555100 | 0.11215000  |
| C | -1.07265300 | -1.17196200 | 0.09311400  |
| C | -2.44841800 | -0.92843900 | -0.05427400 |
| C | -2.95368000 | 0.38382800  | -0.18790300 |
| C | -2.04518500 | 1.46627400  | -0.16007800 |
| N | -3.34604400 | -1.96993100 | -0.09506100 |
| C | -4.64999100 | -1.81379300 | -0.26740500 |
| C | -5.20872800 | -0.54150600 | -0.40065400 |
| C | -4.36701100 | 0.56921300  | -0.29899900 |
| C | -4.72947100 | 1.16049700  | 1.91334600  |
| F | -4.16203300 | 2.33150200  | 2.08683800  |
| F | -4.14813300 | 0.23020600  | 2.63387600  |
| F | -6.02289200 | 1.20662500  | 2.13851900  |
| C | -6.69639900 | -0.50323100 | -0.62936300 |
| O | -7.29690000 | -1.54730400 | -0.85291300 |

|   |             |             |             |
|---|-------------|-------------|-------------|
| N | -7.29185200 | 0.70095700  | -0.58568700 |
| H | 0.00039700  | 2.05457000  | 0.00505300  |
| H | 0.85007900  | -0.26463100 | 0.22600600  |
| H | -0.71482200 | -2.19188600 | 0.18842600  |
| H | -2.43238200 | 2.47606300  | -0.25251300 |
| H | -2.97952400 | -2.91800700 | -0.00815100 |
| H | -5.25989900 | -2.70758100 | -0.31708100 |
| H | -4.72169400 | 1.56916600  | -0.54172600 |
| H | -6.82730200 | 1.55337600  | -0.31128500 |
| H | -8.29324100 | 0.73513700  | -0.72195000 |

18H (Charge = 1, Multiplicity = 2):

|   |             |             |             |
|---|-------------|-------------|-------------|
| C | -1.17129500 | 2.28840900  | -0.34378400 |
| C | -0.36058600 | 1.13841600  | -0.25406100 |
| C | -0.90998200 | -0.12240300 | -0.16498900 |
| C | -2.31095600 | -0.25790000 | -0.16517100 |
| C | -3.13729500 | 0.88764200  | -0.25785900 |
| C | -2.53993400 | 2.16487000  | -0.34160100 |
| N | -2.91699100 | -1.50610300 | -0.09505500 |
| C | -4.23718000 | -1.63691100 | -0.13429700 |
| C | -5.10331200 | -0.54500400 | -0.22603100 |
| C | -4.55741400 | 0.73618000  | -0.21986600 |
| C | -2.07726000 | -2.71189700 | -0.00021800 |
| C | -4.82874500 | 1.29849600  | 2.01740200  |
| F | -4.43715700 | 2.54519300  | 2.14793300  |
| F | -4.05331100 | 0.47770700  | 2.68797200  |
| F | -6.09081500 | 1.14774200  | 2.34925300  |
| C | -6.56837800 | -0.88855000 | -0.29234900 |
| O | -6.90927400 | -2.06299900 | -0.37084900 |
| N | -7.43938200 | 0.13424000  | -0.27141400 |
| H | -0.71071200 | 3.26755800  | -0.41161900 |
| H | 0.71894300  | 1.24405400  | -0.25482800 |
| H | -0.26729100 | -0.99050300 | -0.09732400 |
| H | -3.18659300 | 3.03480700  | -0.40081500 |
| H | -4.63747100 | -2.64374000 | -0.10856800 |
| H | -5.15870900 | 1.61955900  | -0.42653000 |
| H | -2.72974600 | -3.58002400 | 0.04426300  |
| H | -1.43712300 | -2.77062300 | -0.88117700 |
| H | -1.47165800 | -2.65458000 | 0.90463800  |
| H | -7.17832000 | 1.09981200  | -0.14361200 |
| H | -8.42548800 | -0.08787400 | -0.29940600 |

19H (Charge = 1, Multiplicity = 2):

|   |             |             |             |
|---|-------------|-------------|-------------|
| C | -1.53542400 | 1.61624800  | -0.28341600 |
| C | -0.88241800 | 0.37720500  | -0.08948100 |
| C | -1.59233600 | -0.79999800 | -0.01578000 |
| C | -2.98962200 | -0.74473800 | -0.13666200 |
| C | -3.66314700 | 0.48336600  | -0.33822100 |
| C | -2.90311400 | 1.67354100  | -0.40305800 |
| N | -3.74215300 | -1.89534300 | -0.07856900 |
| C | -5.05716000 | -1.93088900 | -0.21391500 |
| C | -5.76627300 | -0.74256900 | -0.42033000 |
| C | -5.08431100 | 0.48086200  | -0.42266800 |

|   |             |             |             |
|---|-------------|-------------|-------------|
| C | -5.52656300 | 1.16196100  | 1.77698100  |
| F | -5.08008700 | 2.38520400  | 1.92721100  |
| F | -4.90140500 | 0.31373100  | 2.55742000  |
| F | -6.82844300 | 1.08967300  | 1.92024400  |
| C | -7.19079700 | -0.79156300 | -0.56866000 |
| N | -8.34105100 | -0.81977900 | -0.68474500 |
| H | -0.94744000 | 2.52566000  | -0.33514000 |
| H | 0.19795600  | 0.35400200  | 0.00342500  |
| H | -1.10399200 | -1.75755600 | 0.13299300  |
| H | -3.42123500 | 2.61634600  | -0.54640100 |
| H | -3.25099200 | -2.77877000 | 0.06506000  |
| H | -5.53626500 | -2.90150400 | -0.17104600 |
| H | -5.60593000 | 1.39535600  | -0.69742800 |

20H (Charge = 1, Multiplicity = 2):

|   |             |             |             |
|---|-------------|-------------|-------------|
| C | 1.20847300  | 1.59971000  | -0.27141800 |
| C | 1.94170500  | 0.41618300  | -0.02484200 |
| C | 1.31065400  | -0.80104000 | 0.09344900  |
| C | -0.08783600 | -0.84517100 | -0.03460200 |
| C | -0.84112900 | 0.32602400  | -0.28273100 |
| C | -0.15942400 | 1.55873300  | -0.39816100 |
| N | -0.76002900 | -2.04192700 | 0.05941900  |
| C | -2.07411000 | -2.16189800 | -0.06414700 |
| C | -2.86182400 | -1.03875700 | -0.30079700 |
| C | -2.26137800 | 0.22266200  | -0.37884500 |
| C | -2.97589300 | 1.06837100  | 1.63911000  |
| F | -1.90688800 | 1.43833400  | 2.30331200  |
| F | -3.62552500 | 0.11173600  | 2.26046300  |
| F | -3.75564200 | 2.08812500  | 1.36949700  |
| C | -4.33795300 | -1.22345300 | -0.35634200 |
| O | -4.88034800 | -2.30325800 | -0.40577400 |
| O | -4.96362700 | -0.05187700 | -0.30007100 |
| C | -6.87997400 | 1.31468000  | 0.01915400  |
| C | -6.40865100 | -0.09175000 | -0.26088300 |
| H | 1.73451500  | 2.54379200  | -0.35865900 |
| H | 3.02069300  | 0.46857900  | 0.07282400  |
| H | 1.86245500  | -1.71639500 | 0.28211700  |
| H | -0.73860700 | 2.45847500  | -0.58145000 |
| H | -0.21022000 | -2.88466800 | 0.22903700  |
| H | -2.49439000 | -3.15711800 | 0.02123700  |
| H | -2.82553000 | 1.07381000  | -0.75258600 |
| H | -7.97202000 | 1.33154600  | 0.04713600  |
| H | -6.50088800 | 1.66122200  | 0.98349900  |
| H | -6.54185900 | 2.00040700  | -0.76166300 |
| H | -6.76737900 | -0.46771700 | -1.22283300 |
| H | -6.71181600 | -0.79169400 | 0.52164800  |

21H (Charge = 1, Multiplicity = 2):

|   |             |            |             |
|---|-------------|------------|-------------|
| C | -0.06585800 | 0.42008500 | 0.98267600  |
| C | -0.04249800 | 1.17608100 | -0.22042100 |
| C | -1.18096300 | 1.39028300 | -0.95377700 |
| C | -2.39975800 | 0.84270600 | -0.49351100 |
| C | -2.44568300 | 0.09131700 | 0.71374900  |



|   |             |             |             |
|---|-------------|-------------|-------------|
| C | -1.24015500 | -0.11296900 | 1.43930500  |
| N | -3.55025400 | 1.03445100  | -1.18768600 |
| C | -4.76512800 | 0.56724400  | -0.80255800 |
| C | -4.85995000 | -0.18738200 | 0.39953200  |
| C | -3.67870000 | -0.45887500 | 1.11964400  |
| C | -5.91699200 | 0.83651600  | -1.57504800 |
| C | -7.12624300 | 0.35099200  | -1.14899100 |
| C | -7.24064700 | -0.41182500 | 0.04450600  |
| C | -6.13239100 | -0.67851400 | 0.80118200  |
| C | -3.32718700 | -2.68218600 | 0.27056700  |
| F | -2.22877800 | -3.16325800 | 0.80666400  |
| F | -3.21256800 | -2.55311500 | -1.03182000 |
| F | -4.38047300 | -3.39764600 | 0.59384700  |
| H | 0.85535400  | 0.26864900  | 1.53391500  |
| H | 0.89818300  | 1.59184100  | -0.56581900 |
| H | -1.17043700 | 1.96560200  | -1.87379700 |
| H | -1.28099900 | -0.69869900 | 2.35235500  |
| H | -3.50146000 | 1.57563100  | -2.05068700 |
| H | -3.74610500 | -0.95742400 | 2.08515300  |
| H | -5.82157300 | 1.41871800  | -2.48583100 |
| H | -8.01626800 | 0.55271300  | -1.73581100 |
| H | -8.21339000 | -0.78191500 | 0.34806700  |
| H | -6.19426100 | -1.26498700 | 1.71255900  |

22H (Charge = 1, Multiplicity = 2):

|   |             |             |             |
|---|-------------|-------------|-------------|
| C | -0.12865200 | 0.44084700  | 1.38325100  |
| C | -0.10323700 | 1.21506600  | 0.19697800  |
| C | -1.21677200 | 1.37665700  | -0.58993300 |
| C | -2.43740500 | 0.76206600  | -0.21215400 |
| C | -2.48109300 | 0.02121700  | 1.00498700  |
| C | -1.29979700 | -0.14250100 | 1.77829300  |
| N | -3.57435700 | 0.88227000  | -0.97191600 |
| C | -4.79672400 | 0.45117200  | -0.52008400 |
| C | -4.87554600 | -0.29413500 | 0.69272900  |
| C | -3.69352000 | -0.56851200 | 1.40040500  |
| C | -5.99631900 | 0.74404000  | -1.21702100 |
| C | -7.19314500 | 0.27499500  | -0.73430400 |
| C | -7.27279900 | -0.50478400 | 0.44599500  |
| C | -6.13182400 | -0.78039400 | 1.14603700  |
| C | -3.48382800 | 1.49651900  | -2.30723200 |
| C | -3.27904900 | -2.76909200 | 0.49397500  |
| F | -2.29989200 | -3.31264500 | 1.18086600  |
| F | -2.94435500 | -2.59078200 | -0.76434600 |
| F | -4.39192200 | -3.45839700 | 0.60428200  |
| H | 0.77388900  | 0.32702200  | 1.97275600  |
| H | 0.81964000  | 1.70340800  | -0.09839700 |
| H | -1.15583700 | 2.00003900  | -1.47100200 |
| H | -1.36408800 | -0.73303900 | 2.68697400  |
| H | -3.75031200 | -1.08500600 | 2.35687600  |
| H | -5.98855100 | 1.35811400  | -2.10682100 |
| H | -8.10364300 | 0.51743200  | -1.27256300 |
| H | -8.23506500 | -0.86657300 | 0.78974600  |
| H | -6.15120100 | -1.36524800 | 2.06051400  |

|   |             |            |             |
|---|-------------|------------|-------------|
| H | -2.50299500 | 1.29283400 | -2.72661300 |
| H | -4.21958500 | 1.03419900 | -2.95937300 |
| H | -3.65483000 | 2.57321300 | -2.24290300 |

23H (Charge = 1, Multiplicity = 2):

|   |             |             |             |
|---|-------------|-------------|-------------|
| N | 0.00025700  | -0.99324900 | 0.33373500  |
| C | 0.18336100  | 0.29422600  | -0.13262100 |
| N | -0.97156800 | 1.03370600  | -0.40372500 |
| C | -2.23313700 | 0.58284800  | -0.21719900 |
| C | -2.40827800 | -0.71025300 | 0.32112000  |
| C | -1.23958600 | -1.56508900 | 0.59693900  |
| N | -3.28519700 | 1.34981800  | -0.54185300 |
| C | -4.58527100 | 0.96004800  | -0.19760300 |
| C | -4.80226200 | -0.33175600 | 0.33598100  |
| C | -3.68547300 | -1.20206800 | 0.51358600  |
| C | -5.67125600 | 1.83805200  | -0.34673700 |
| C | -6.93892300 | 1.40952900  | -0.00183500 |
| C | -7.17053200 | 0.11415900  | 0.49339800  |
| C | -6.11028000 | -0.74603200 | 0.66132900  |
| C | -3.07008900 | 2.61610800  | -1.26237600 |
| O | -1.35717600 | -2.69880000 | 1.01751900  |
| O | 1.27577400  | 0.78212300  | -0.30914300 |
| C | 1.21984900  | -1.76469600 | 0.58480700  |
| C | -3.93553700 | -2.43585500 | -1.44321300 |
| F | -2.78955700 | -3.03628800 | -1.66037200 |
| F | -4.21639000 | -1.57120600 | -2.38976200 |
| F | -4.91253400 | -3.29200900 | -1.26270500 |
| H | -0.77919400 | 1.99151900  | -0.68154500 |
| H | -3.81383900 | -2.15489400 | 1.02293800  |
| H | -5.53052700 | 2.85031800  | -0.70082200 |
| H | -7.77004800 | 2.09789500  | -0.11239900 |
| H | -8.17699600 | -0.19671300 | 0.74929300  |
| H | -6.24996100 | -1.75005500 | 1.05011100  |
| H | -3.92951600 | 2.80541200  | -1.89892000 |
| H | -2.92838200 | 3.43583700  | -0.55542100 |
| H | -2.20372300 | 2.51154900  | -1.91347300 |
| H | 1.78825200  | -1.30270200 | 1.39322400  |
| H | 0.92253300  | -2.77182300 | 0.86311200  |
| H | 1.82629400  | -1.78623400 | -0.32051800 |

24H (Charge = 1, Multiplicity = 2):

|   |             |             |             |
|---|-------------|-------------|-------------|
| N | 0.01067200  | -1.16109600 | 0.26305600  |
| C | 0.17354400  | 0.18521400  | -0.01012100 |
| N | -0.98392500 | 0.98676200  | -0.08672600 |
| C | -2.23042000 | 0.44007100  | -0.03384200 |
| C | -2.37915300 | -0.88531800 | 0.43272200  |
| C | -1.19753400 | -1.74518200 | 0.60948300  |
| N | -3.31605700 | 1.14282500  | -0.41531000 |
| C | -4.60261500 | 0.71103700  | -0.06933400 |
| C | -4.78291800 | -0.57690100 | 0.48157500  |
| C | -3.64117900 | -1.42072700 | 0.61631400  |
| C | -5.71427800 | 1.54629100  | -0.26566100 |
| C | -6.96983000 | 1.09028800  | 0.08812400  |

|   |             |             |             |
|---|-------------|-------------|-------------|
| C | -7.16199100 | -0.19501400 | 0.62624200  |
| C | -6.07838600 | -1.02170500 | 0.81553500  |
| C | -3.21163700 | 2.26590400  | -1.37280200 |
| O | -1.28457200 | -2.90118900 | 0.97475900  |
| O | 1.26748800  | 0.68176400  | -0.15537200 |
| C | 1.23517500  | -1.96275600 | 0.32024400  |
| C | -0.72890400 | 2.43357100  | 0.07280700  |
| C | -3.85949300 | -2.60555500 | -1.37520300 |
| F | -4.69923700 | -3.59019700 | -1.16200500 |
| F | -2.66472100 | -3.04263900 | -1.69687300 |
| F | -4.31952000 | -1.75871400 | -2.26630400 |
| H | -3.73354000 | -2.39542500 | 1.09063800  |
| H | -5.59767500 | 2.54509500  | -0.66615900 |
| H | -7.82286700 | 1.74589400  | -0.05105900 |
| H | -8.15955400 | -0.52807400 | 0.88920900  |
| H | -6.19203900 | -2.02223000 | 1.22119500  |
| H | -3.98746900 | 2.11915200  | -2.12304000 |
| H | -3.34604700 | 3.22741100  | -0.87722100 |
| H | -2.24663200 | 2.21804000  | -1.86831500 |
| H | 1.82821900  | -1.76830200 | -0.57212800 |
| H | 1.81426400  | -1.70089900 | 1.20780400  |
| H | 0.94393300  | -3.00884500 | 0.36090200  |
| H | 0.09279600  | 2.54032000  | 0.77821600  |
| H | -0.45406900 | 2.89937800  | -0.87304400 |
| H | -1.61833100 | 2.90007000  | 0.48979600  |

25H (Charge = 1, Multiplicity = 2):

|   |             |             |             |
|---|-------------|-------------|-------------|
| C | -2.25675500 | 0.88861200  | 0.93195700  |
| C | -2.54979000 | 2.19800700  | 1.37574600  |
| C | -3.83182800 | 2.67777200  | 1.28854300  |
| C | -4.84745200 | 1.85473600  | 0.74971700  |
| C | -4.56539400 | 0.52507200  | 0.31585900  |
| C | -3.23079300 | 0.06501400  | 0.41455500  |
| C | -6.17751700 | 2.34278200  | 0.67467500  |
| N | -7.10994500 | 1.60140200  | 0.06013600  |
| C | -6.89143700 | 0.33006100  | -0.35673200 |
| C | -5.65221000 | -0.23930700 | -0.23129100 |
| C | -5.49644800 | -1.66798300 | -0.65767600 |
| O | -4.61976400 | -2.40269300 | -0.26394900 |
| O | -6.45371500 | -2.02742500 | -1.51006700 |
| C | -7.10181200 | -4.28697800 | -0.86360300 |
| C | -6.46332600 | -3.41464400 | -1.92317300 |
| C | -6.77134600 | 1.92887600  | 2.86043600  |
| F | -5.72565700 | 2.10404900  | 3.63092000  |
| F | -7.16975200 | 0.67746400  | 2.85522400  |
| F | -7.74902000 | 2.74681100  | 3.17184000  |
| H | -1.23725800 | 0.52327700  | 1.00039700  |
| H | -1.75862800 | 2.81924700  | 1.78064100  |
| H | -4.08801900 | 3.67952100  | 1.61936800  |
| H | -2.98380000 | -0.93411300 | 0.08497600  |
| H | -6.41933300 | 3.38583700  | 0.85622100  |
| H | -8.04282100 | 1.99448100  | -0.05804300 |
| H | -7.74163400 | -0.18214700 | -0.78595900 |

|   |             |             |             |
|---|-------------|-------------|-------------|
| H | -7.15433400 | -5.31643100 | -1.22743800 |
| H | -6.51471600 | -4.27581000 | 0.05753100  |
| H | -8.11658800 | -3.94482000 | -0.64559600 |
| H | -7.04157200 | -3.41379400 | -2.84729600 |
| H | -5.43738200 | -3.71949700 | -2.13796300 |

26H (Charge = 1, Multiplicity = 2):

|   |             |             |             |
|---|-------------|-------------|-------------|
| C | -2.46384900 | -0.18683700 | 0.13449900  |
| C | -2.53278800 | 1.20891000  | -0.08043500 |
| C | -3.74951700 | 1.81629500  | -0.26361600 |
| C | -4.92660400 | 1.03333300  | -0.23985200 |
| C | -4.86814500 | -0.37127300 | -0.01073000 |
| C | -3.59734300 | -0.96619700 | 0.17091800  |
| C | -6.19391300 | 1.65507700  | -0.39490600 |
| N | -7.29012100 | 0.89094800  | -0.47054800 |
| C | -7.27798200 | -0.45242000 | -0.25480100 |
| C | -6.10059300 | -1.10624400 | -0.01870400 |
| C | -6.13193900 | -2.58570700 | 0.28136200  |
| O | -5.44541500 | -3.05725200 | 1.17753100  |
| N | -6.98066000 | -3.30603400 | -0.47530900 |
| C | -6.38704700 | 2.41795200  | 1.76280700  |
| F | -6.03481900 | 1.44097300  | 2.56510400  |
| F | -7.65026700 | 2.74046400  | 1.91735000  |
| F | -5.59753100 | 3.45824900  | 1.88962400  |
| H | -1.49398100 | -0.65292300 | 0.27466500  |
| H | -1.62096000 | 1.79543600  | -0.10138100 |
| H | -3.83190200 | 2.88591700  | -0.43034400 |
| H | -3.52913700 | -2.03170900 | 0.34642800  |
| H | -6.29465800 | 2.69154600  | -0.70387000 |
| H | -8.18606100 | 1.34200600  | -0.64985100 |
| H | -8.24463400 | -0.93947200 | -0.27936200 |
| H | -7.42460100 | -2.92628000 | -1.29935500 |
| H | -7.04149600 | -4.30249500 | -0.31178900 |

27H (Charge = 1, Multiplicity = 2):

|   |             |             |             |
|---|-------------|-------------|-------------|
| C | -1.28578500 | -0.30778000 | 0.30848700  |
| C | -1.38918500 | 1.09470000  | 0.16656900  |
| C | -2.61649900 | 1.67814800  | -0.02969700 |
| C | -3.76914100 | 0.86317300  | -0.09143300 |
| C | -3.67557200 | -0.54623100 | 0.06601800  |
| C | -2.39708400 | -1.11852300 | 0.26155600  |
| C | -5.04795100 | 1.45995100  | -0.26478900 |
| N | -6.13545500 | 0.69397000  | -0.42829300 |
| C | -6.07216000 | -0.66171100 | -0.27605000 |
| C | -4.89020600 | -1.30177800 | -0.02896300 |
| C | -7.45377600 | 1.31325800  | -0.64312000 |
| C | -4.90381300 | -2.79279600 | 0.20923100  |
| O | -4.24022900 | -3.28521900 | 1.11138300  |
| N | -5.71230300 | -3.49866700 | -0.60300900 |
| C | -5.44057200 | 2.06263700  | 1.92155000  |
| F | -5.87107700 | 0.96056500  | 2.49477600  |
| F | -6.36897400 | 2.99351200  | 1.91697500  |
| F | -4.32705800 | 2.49048000  | 2.46667900  |

|   |             |             |             |
|---|-------------|-------------|-------------|
| H | -0.30791900 | -0.75375000 | 0.45830500  |
| H | -0.49492100 | 1.70653500  | 0.21098800  |
| H | -2.72359000 | 2.75258400  | -0.14210700 |
| H | -2.30568700 | -2.19025500 | 0.38049100  |
| H | -5.14396900 | 2.51176600  | -0.52073000 |
| H | -7.02010900 | -1.18124200 | -0.35624700 |
| H | -7.95065800 | 0.79600200  | -1.46306100 |
| H | -8.03851500 | 1.21332500  | 0.27352500  |
| H | -7.31277200 | 2.36384200  | -0.88963300 |
| H | -6.13019800 | -3.09644400 | -1.43003700 |
| H | -5.75743600 | -4.50184000 | -0.48092300 |

28H (Charge = 1, Multiplicity = 2):

|   |             |             |             |
|---|-------------|-------------|-------------|
| C | -2.47901100 | -0.70248300 | -0.24605400 |
| C | -2.53708700 | 0.69728300  | -0.44020100 |
| C | -3.74952300 | 1.33871500  | -0.50513000 |
| C | -4.93877100 | 0.58432900  | -0.38759100 |
| C | -4.88111800 | -0.82268400 | -0.18791100 |
| C | -3.62422700 | -1.45619600 | -0.12114900 |
| C | -6.20718600 | 1.22225300  | -0.41266400 |
| N | -7.32120000 | 0.47202300  | -0.40514600 |
| C | -7.32042700 | -0.86792100 | -0.20595200 |
| C | -6.12586300 | -1.52769700 | -0.08340800 |
| C | -6.13833300 | -2.94583500 | 0.13021600  |
| N | -6.12543300 | -4.08903300 | 0.30406400  |
| C | -6.24098200 | 1.88698100  | 1.79799700  |
| F | -5.01379000 | 2.10095000  | 2.20227100  |
| F | -6.79378500 | 0.87380000  | 2.42346700  |
| F | -6.97766600 | 2.96782600  | 1.87500800  |
| H | -1.51143900 | -1.19031100 | -0.19412700 |
| H | -1.61651500 | 1.26224300  | -0.53469200 |
| H | -3.81830700 | 2.41281100  | -0.64579100 |
| H | -3.56956100 | -2.52968900 | 0.02804600  |
| H | -6.32155200 | 2.26550200  | -0.69208200 |
| H | -8.22176200 | 0.93970000  | -0.50752300 |
| H | -8.28526900 | -1.35614700 | -0.16609800 |

29H (Charge = 1, Multiplicity = 2):

|   |             |             |             |
|---|-------------|-------------|-------------|
| C | -6.90325700 | 1.78263500  | -0.38521400 |
| C | -6.04258200 | 2.89551800  | -0.44101500 |
| C | -4.68001300 | 2.70561900  | -0.40833000 |
| C | -4.16257100 | 1.39712100  | -0.32429400 |
| C | -5.01938500 | 0.27132600  | -0.25260500 |
| C | -6.40855600 | 0.49646400  | -0.29448300 |
| C | -2.74481900 | 1.20071600  | -0.28244500 |
| N | -2.25004200 | -0.03087400 | -0.31930900 |
| C | -3.01896700 | -1.17449200 | -0.20267200 |
| C | -4.42494600 | -1.05221400 | -0.15532300 |
| C | -2.37590300 | -2.42154800 | -0.14466600 |
| C | -3.14003400 | -3.56068600 | -0.02393300 |
| C | -4.54238700 | -3.46637700 | 0.04059400  |
| C | -5.17167100 | -2.23988200 | -0.02423600 |
| C | -2.46912000 | 1.62870400  | 1.94286600  |

|   |             |             |             |
|---|-------------|-------------|-------------|
| F | -1.21713100 | 1.98239800  | 2.11561200  |
| F | -2.72934600 | 0.47848600  | 2.52137100  |
| F | -3.29740100 | 2.56770000  | 2.33125700  |
| H | -7.97684600 | 1.93765100  | -0.41480500 |
| H | -6.45443800 | 3.89608700  | -0.51117000 |
| H | -3.99114100 | 3.54410300  | -0.44870400 |
| H | -7.09987600 | -0.33706000 | -0.25955700 |
| H | -2.05512200 | 2.01333600  | -0.49304600 |
| H | -1.23867300 | -0.14597500 | -0.38491300 |
| H | -1.29219000 | -2.46306800 | -0.19062700 |
| H | -2.65841500 | -4.53097100 | 0.02574800  |
| H | -5.13632900 | -4.36812300 | 0.14255900  |
| H | -6.25278700 | -2.19407700 | 0.03093100  |

30H (Charge = 1, Multiplicity = 2):

|   |             |             |             |
|---|-------------|-------------|-------------|
| C | -7.04986600 | 1.62431700  | -0.04121000 |
| C | -6.25609400 | 2.78224400  | -0.14509600 |
| C | -4.88762400 | 2.66432400  | -0.23342400 |
| C | -4.30122600 | 1.38257900  | -0.22124700 |
| C | -5.08609600 | 0.21571800  | -0.10005300 |
| C | -6.48377800 | 0.36441800  | -0.01967700 |
| C | -2.87891100 | 1.26132000  | -0.31194600 |
| N | -2.28443200 | 0.07608200  | -0.42011000 |
| C | -2.99720000 | -1.11474200 | -0.24906400 |
| C | -4.40248600 | -1.06661500 | -0.08016700 |
| C | -2.31367100 | -2.34428600 | -0.25216300 |
| C | -3.01954600 | -3.51589600 | -0.07694200 |
| C | -4.41063500 | -3.48707300 | 0.10370000  |
| C | -5.08559800 | -2.28423000 | 0.10138400  |
| C | -0.82643500 | 0.03311200  | -0.61072800 |
| C | -2.38544700 | 1.65187800  | 1.88920100  |
| F | -2.62845500 | 0.50686100  | 2.48623200  |
| F | -3.13666700 | 2.61687200  | 2.36112100  |
| F | -1.10852200 | 1.95861700  | 1.94045400  |
| H | -8.12870800 | 1.72223800  | 0.02211400  |
| H | -6.72368800 | 3.76043400  | -0.15862800 |
| H | -4.24818200 | 3.53818800  | -0.31548000 |
| H | -7.12735500 | -0.50377100 | 0.05406200  |
| H | -2.27835400 | 2.13330300  | -0.55864900 |
| H | -1.24044500 | -2.37950300 | -0.38379300 |
| H | -2.48943200 | -4.46190500 | -0.07495200 |
| H | -4.95783300 | -4.41228800 | 0.24776800  |
| H | -6.15872800 | -2.27824800 | 0.24898700  |
| H | -0.46877400 | 1.05066600  | -0.75071900 |
| H | -0.36045600 | -0.40834500 | 0.27243900  |
| H | -0.59744000 | -0.56186400 | -1.49513400 |

31H (Charge = 1, Multiplicity = 2):

|   |             |             |            |
|---|-------------|-------------|------------|
| C | -0.68794400 | -0.92207100 | 0.36987600 |
| C | -0.26237300 | 0.39962900  | 0.23843800 |
| C | -1.18239500 | 1.43449000  | 0.10954400 |
| C | -2.54946300 | 1.13922200  | 0.12412000 |
| C | -2.99246500 | -0.20218600 | 0.25272400 |

|   |             |             |             |
|---|-------------|-------------|-------------|
| C | -2.04965800 | -1.25091300 | 0.38048900  |
| C | -3.54325700 | 2.16037800  | -0.03869700 |
| N | -4.83315800 | 1.85558500  | 0.06023800  |
| C | -5.32403500 | 0.56181000  | 0.16142100  |
| C | -4.38411300 | -0.48940000 | 0.26623700  |
| C | -6.69283700 | 0.31284300  | 0.17994900  |
| C | -7.12876900 | -1.00448700 | 0.30064000  |
| C | -6.22453200 | -2.05861400 | 0.40655200  |
| C | -4.84359200 | -1.82362400 | 0.39332200  |
| C | -3.86325600 | -2.87461200 | 0.51209300  |
| C | -2.53456400 | -2.60264800 | 0.50863100  |
| C | -3.33308100 | 2.34336600  | -2.31119100 |
| F | -3.47022800 | 1.13401800  | -2.79871600 |
| F | -2.14967900 | 2.84410400  | -2.57074400 |
| F | -4.30032800 | 3.13867000  | -2.70146700 |
| H | 0.04454800  | -1.71855700 | 0.46528100  |
| H | 0.79890400  | 0.62217200  | 0.23410200  |
| H | -0.85523000 | 2.46381700  | -0.00073400 |
| H | -3.28727900 | 3.21580000  | 0.00654000  |
| H | -5.51191900 | 2.61556300  | 0.01424700  |
| H | -7.39470700 | 1.13666900  | 0.09972000  |
| H | -8.19375900 | -1.20905500 | 0.31360100  |
| H | -6.58621400 | -3.07763100 | 0.50350100  |
| H | -4.21963600 | -3.89557700 | 0.60920300  |
| H | -1.80456500 | -3.40090000 | 0.60291500  |

32H (Charge = 1, Multiplicity = 2):

|   |             |             |             |
|---|-------------|-------------|-------------|
| C | -6.72201600 | 0.44616000  | 0.37593700  |
| C | -7.06995400 | -0.79703200 | -0.21587300 |
| C | -6.14428400 | -1.78686700 | -0.50638300 |
| C | -4.76706700 | -1.58153600 | -0.21150900 |
| C | -4.45306000 | -0.35694100 | 0.37182500  |
| C | -5.38864400 | 0.63988300  | 0.66435100  |
| C | -3.65925300 | -2.44187600 | -0.42754500 |
| C | -2.37335800 | -2.04316900 | -0.07237500 |
| C | -2.09326600 | -0.78799500 | 0.50885800  |
| C | -3.16585200 | 0.06493700  | 0.74166100  |
| C | -3.34935000 | 1.40488900  | 1.25755700  |
| N | -4.65178000 | 1.69173500  | 1.23182700  |
| C | -2.69794700 | 2.37808600  | -0.88141000 |
| F | -2.50934400 | 3.66836800  | -0.74170800 |
| F | -3.76608000 | 2.11769200  | -1.60024000 |
| F | -1.63288800 | 1.77709900  | -1.35522700 |
| H | -7.47952900 | 1.19386700  | 0.58272100  |
| H | -8.11444400 | -0.97119000 | -0.44952600 |
| H | -6.46952300 | -2.71800400 | -0.95961100 |
| H | -3.81325900 | -3.41880200 | -0.87646400 |
| H | -1.54824600 | -2.72277900 | -0.25373900 |
| H | -1.07330500 | -0.51260700 | 0.75612100  |
| H | -2.64097300 | 2.06261800  | 1.74716400  |
| H | -5.04738100 | 2.56495700  | 1.57225300  |

33H (Charge = 1, Multiplicity = 2):

|   |             |             |             |
|---|-------------|-------------|-------------|
| C | -4.94239000 | 2.62899800  | 1.35119900  |
| C | -5.15695600 | 3.20163400  | 0.08990500  |
| C | -5.84820000 | 2.50286400  | -0.88103000 |
| C | -6.33270200 | 1.22128300  | -0.59355000 |
| C | -6.12097800 | 0.64849600  | 0.67307500  |
| C | -5.41852700 | 1.36222800  | 1.64650400  |
| N | -7.03043600 | 0.50701100  | -1.56070000 |
| C | -7.43428800 | -0.75293200 | -1.38500600 |
| C | -7.32557300 | -1.33108400 | -0.10458300 |
| N | -6.63848400 | -0.63483200 | 0.89951700  |
| C | -7.70540400 | -2.56719400 | 0.40965500  |
| C | -7.26129000 | -2.60405300 | 1.73478800  |
| C | -6.60845400 | -1.40450600 | 2.01076300  |
| C | -5.65381100 | -1.80434700 | -2.27213500 |
| F | -5.53809200 | -1.40454900 | -3.51590400 |
| F | -5.79828200 | -3.10339400 | -2.18474600 |
| F | -4.65892700 | -1.37108800 | -1.53013100 |
| H | -4.39701800 | 3.17959400  | 2.10965400  |
| H | -4.77845900 | 4.19381900  | -0.12826000 |
| H | -6.02498400 | 2.92109800  | -1.86693500 |
| H | -5.24685200 | 0.92709100  | 2.62423700  |
| H | -7.17809100 | 0.94786400  | -2.46643100 |
| H | -8.06762100 | -1.19315600 | -2.14931900 |
| H | -8.24176400 | -3.33028400 | -0.13595200 |
| H | -7.39318900 | -3.41064600 | 2.44112000  |
| H | -6.14072700 | -1.06537100 | 2.92247500  |

34H (Charge = 1, Multiplicity = 2):

|   |             |             |             |
|---|-------------|-------------|-------------|
| C | -7.12038600 | -0.89741300 | -0.38891800 |
| C | -6.27524400 | -1.98346300 | -0.70825100 |
| C | -4.91221600 | -1.94359300 | -0.47476600 |
| C | -4.41733100 | -0.76968800 | 0.09748800  |
| C | -5.25836300 | 0.31050900  | 0.41672000  |
| C | -6.63348700 | 0.26764200  | 0.17652800  |
| N | -3.14346500 | -0.38968000 | 0.46571400  |
| C | -3.16280400 | 0.87985800  | 0.91735000  |
| N | -4.44686700 | 1.28420000  | 0.96085900  |
| C | -2.52014100 | 1.89588300  | -0.95417000 |
| F | -2.44037500 | 3.19690500  | -0.78372700 |
| F | -3.47611300 | 1.58314300  | -1.80592900 |
| F | -1.36615900 | 1.38739600  | -1.32898600 |
| H | -8.18176900 | -0.98099700 | -0.59551500 |
| H | -6.70966400 | -2.87290400 | -1.15133700 |
| H | -4.25598700 | -2.77080600 | -0.71839600 |
| H | -7.27398500 | 1.10631600  | 0.42281400  |
| H | -2.29921300 | -0.94670700 | 0.36896700  |
| H | -2.35397600 | 1.34714500  | 1.46394200  |
| H | -4.74551700 | 2.19376800  | 1.30138800  |

35H (Charge = 1, Multiplicity = 2):

|   |             |             |             |
|---|-------------|-------------|-------------|
| C | -7.13540700 | -1.06864800 | -0.73904100 |
| C | -6.28098900 | -2.15526300 | -1.02748100 |
| C | -4.92936300 | -2.12365300 | -0.72828200 |



|   |             |             |             |
|---|-------------|-------------|-------------|
| C | -4.45846200 | -0.95807300 | -0.12035600 |
| C | -5.30859400 | 0.12202600  | 0.16816700  |
| C | -6.67026300 | 0.08969200  | -0.13967600 |
| N | -3.19682900 | -0.59714100 | 0.30772400  |
| C | -3.24938600 | 0.66904800  | 0.76935600  |
| N | -4.52929400 | 1.09474500  | 0.76167400  |
| C | -4.98744300 | 2.41093100  | 1.19029200  |
| C | -1.98464800 | -1.39370000 | 0.15994000  |
| C | -2.54084700 | 1.72651900  | -1.06387900 |
| F | -2.64872200 | 3.02907200  | -0.89811300 |
| F | -3.36861600 | 1.29817300  | -1.99721900 |
| F | -1.29941400 | 1.38099400  | -1.33791900 |
| H | -8.18606600 | -1.14506500 | -0.99700400 |
| H | -6.69753100 | -3.03852500 | -1.49923600 |
| H | -4.26727900 | -2.95276500 | -0.95089400 |
| H | -7.32015600 | 0.92881000  | 0.08167700  |
| H | -2.46087700 | 1.13242300  | 1.35116700  |
| H | -5.31265800 | 2.98231000  | 0.31849200  |
| H | -5.81718600 | 2.28742300  | 1.88706500  |
| H | -4.16158400 | 2.92056800  | 1.68452700  |
| H | -1.16662900 | -0.87282500 | 0.65546300  |
| H | -2.14164100 | -2.36686400 | 0.62653900  |
| H | -1.76121200 | -1.51878100 | -0.90157700 |

36H (Charge = 1, Multiplicity = 2):

|   |             |             |             |
|---|-------------|-------------|-------------|
| C | -4.82279200 | -0.03780000 | 0.59239300  |
| C | -4.69022900 | 0.09317000  | -0.83512600 |
| C | -3.44226500 | -0.09611300 | -1.46428500 |
| C | -2.37417000 | -0.40912300 | -0.65696700 |
| C | -2.50398800 | -0.53434600 | 0.75378000  |
| C | -3.70696900 | -0.35447300 | 1.39518600  |
| N | -1.04267100 | -0.66010900 | -0.94085000 |
| C | -0.36185700 | -0.84706700 | 0.20603900  |
| N | -1.24092000 | -0.84999300 | 1.22556200  |
| C | -6.10755700 | 0.16244100  | 1.18202200  |
| C | -7.19151100 | 0.47433900  | 0.41091700  |
| C | -7.05975000 | 0.60654700  | -1.00072200 |
| C | -5.84786700 | 0.42134700  | -1.60382300 |
| C | 0.45097500  | 1.19428700  | 0.43201000  |
| F | -0.63392900 | 1.94003600  | 0.42660900  |
| F | 1.22180800  | 1.46240500  | -0.59760000 |
| F | 1.10252300  | 1.30409500  | 1.56699800  |
| H | -3.33675300 | 0.00391200  | -2.53910700 |
| H | -3.80189100 | -0.45071100 | 2.47131700  |
| H | -0.61485300 | -0.65464000 | -1.86234100 |
| H | 0.63575700  | -1.26470900 | 0.26114100  |
| H | -0.98610600 | -1.00707000 | 2.19626900  |
| H | -6.20031100 | 0.06000100  | 2.25930900  |
| H | -8.16235300 | 0.62359900  | 0.87233200  |
| H | -7.93182700 | 0.85584400  | -1.59656000 |
| H | -5.73914800 | 0.52019500  | -2.67995700 |

37H (Charge = 1, Multiplicity = 2):

|   |             |             |             |
|---|-------------|-------------|-------------|
| C | -2.40797800 | 0.26572500  | -1.58298800 |
| C | -2.38178800 | 1.50189700  | -0.91015500 |
| C | -3.20686900 | 1.75525400  | 0.17367500  |
| C | -4.06542800 | 0.73192000  | 0.57823400  |
| C | -4.08823600 | -0.49760600 | -0.09513500 |
| C | -3.25823900 | -0.75126300 | -1.18990200 |
| S | -5.20580100 | 0.72597900  | 1.90314900  |
| C | -5.72836000 | -0.85193800 | 1.46411600  |
| N | -5.00621700 | -1.36274200 | 0.47603000  |
| C | -7.64567200 | -0.29192700 | 0.26588500  |
| F | -8.36426400 | 0.57255400  | 0.93912400  |
| F | -8.31157800 | -1.38819900 | 0.00193500  |
| F | -7.12838100 | 0.24245200  | -0.81714200 |
| H | -1.74779900 | 0.10805200  | -2.42858000 |
| H | -1.70085300 | 2.27544200  | -1.24764200 |
| H | -3.18558100 | 2.70767300  | 0.69088000  |
| H | -3.29347500 | -1.70800500 | -1.69846100 |
| H | -6.34542800 | -1.47147400 | 2.10698100  |
| H | -5.14512700 | -2.32005500 | 0.14973700  |

38H (Charge = 1, Multiplicity = 2):

|   |             |             |             |
|---|-------------|-------------|-------------|
| C | -2.46141000 | 0.38481000  | -1.77320800 |
| C | -2.34250400 | 1.70015700  | -1.28998300 |
| C | -3.06186800 | 2.13322100  | -0.18725200 |
| C | -3.90874900 | 1.21193700  | 0.42890800  |
| C | -4.02827000 | -0.09697300 | -0.05689000 |
| C | -3.30325100 | -0.53253300 | -1.16930000 |
| S | -4.93220800 | 1.44253300  | 1.82578500  |
| C | -5.54616600 | -0.15553600 | 1.64291500  |
| N | -4.92812700 | -0.84751800 | 0.69388800  |
| C | -5.24374100 | -2.24442200 | 0.38096500  |
| C | -7.47651400 | 0.32043000  | 0.44229000  |
| F | -6.96963100 | 0.76820900  | -0.68567400 |
| F | -8.19317400 | 1.23408700  | 1.04931000  |
| F | -8.14651500 | -0.79269700 | 0.26340200  |
| H | -1.88407400 | 0.08308500  | -2.64004600 |
| H | -1.67542700 | 2.39264300  | -1.79151600 |
| H | -2.97310200 | 3.14814200  | 0.18323200  |
| H | -3.40301300 | -1.54671400 | -1.53921700 |
| H | -6.14858300 | -0.64302000 | 2.40397000  |
| H | -5.70821700 | -2.28422600 | -0.60640400 |
| H | -4.31656800 | -2.81831400 | 0.38521500  |
| H | -5.92649200 | -2.62422000 | 1.13834500  |

39H (Charge = 1, Multiplicity = 2):

|   |             |             |             |
|---|-------------|-------------|-------------|
| C | -1.98213500 | -0.38966000 | 0.30314200  |
| C | -2.54878100 | -1.67925500 | 0.27173500  |
| C | -3.88005000 | -1.89480800 | -0.06328100 |
| C | -4.59721400 | -0.74995600 | -0.36368700 |
| C | -4.05035100 | 0.53073700  | -0.33449400 |
| C | -2.71696900 | 0.74788000  | 0.00279300  |
| O | -5.91756800 | -0.64928500 | -0.73861200 |
| C | -6.19005500 | 0.64495100  | -0.86683200 |

|   |             |             |             |
|---|-------------|-------------|-------------|
| N | -5.09397900 | 1.37105400  | -0.70032200 |
| C | -7.17556800 | 0.82317900  | 1.17622800  |
| F | -7.52453300 | 2.05808200  | 1.43294500  |
| F | -6.20816300 | 0.41087400  | 1.96542000  |
| F | -8.19821500 | 0.00529800  | 1.18959200  |
| H | -0.93706500 | -0.28437000 | 0.57224300  |
| H | -1.92573000 | -2.53197400 | 0.51751200  |
| H | -4.33041200 | -2.87938900 | -0.09087900 |
| H | -2.29060000 | 1.74326600  | 0.02578500  |
| H | -7.10372100 | 0.96963600  | -1.35234900 |
| H | -5.05544400 | 2.38393500  | -0.80848500 |

40H (Charge = 1, Multiplicity = 2):

|   |             |             |             |
|---|-------------|-------------|-------------|
| C | -1.97511700 | -0.85745400 | 0.52419500  |
| C | -2.54231800 | -2.14595500 | 0.47643900  |
| C | -3.85769300 | -2.36301400 | 0.08224500  |
| C | -4.55978900 | -1.22033900 | -0.25856400 |
| C | -4.01151900 | 0.05802300  | -0.21427100 |
| C | -2.69482300 | 0.27834700  | 0.18086500  |
| O | -5.86151500 | -1.11719900 | -0.68842400 |
| C | -6.11680800 | 0.18015700  | -0.83113600 |
| N | -5.02951100 | 0.91259800  | -0.62878900 |
| C | -4.94291300 | 2.36605800  | -0.74624500 |
| C | -7.12145300 | 0.47581300  | 1.19559800  |
| F | -6.95354200 | 1.73390900  | 1.53217900  |
| F | -6.42634500 | -0.32930600 | 1.96824600  |
| F | -8.38769100 | 0.14334100  | 1.15808300  |
| H | -0.94362100 | -0.75144100 | 0.84105600  |
| H | -1.93278400 | -2.99768100 | 0.75726600  |
| H | -4.30688500 | -3.34775300 | 0.04253400  |
| H | -2.26802100 | 1.27387300  | 0.21561100  |
| H | -7.01140500 | 0.51012600  | -1.34850800 |
| H | -4.68063600 | 2.77979300  | 0.22820900  |
| H | -4.17293100 | 2.60652800  | -1.47964000 |
| H | -5.91122700 | 2.74205200  | -1.07226900 |

41H (Charge = 1, Multiplicity = 2):

|   |             |             |             |
|---|-------------|-------------|-------------|
| C | -5.29854700 | -2.29107300 | 0.24308700  |
| C | -6.69337700 | -2.11051900 | 0.09685400  |
| C | -7.24592300 | -0.85888900 | -0.02188000 |
| C | -6.42324600 | 0.30084900  | 0.00410200  |
| C | -5.02743600 | 0.12829600  | 0.15488000  |
| C | -4.48879200 | -1.18300300 | 0.26731300  |
| C | -6.92956500 | 1.62523900  | -0.10678900 |
| C | -6.08053600 | 2.70395300  | -0.06737000 |
| C | -4.68400800 | 2.53922500  | 0.08091700  |
| C | -4.17778600 | 1.26796300  | 0.18732300  |
| N | -2.80601100 | 1.02198900  | 0.34791000  |
| C | -2.28261100 | -0.21450600 | 0.32316800  |
| N | -3.09683200 | -1.27806700 | 0.41791100  |
| C | -1.79081400 | -0.33048600 | -1.70875600 |
| F | -1.20703400 | -1.48176700 | -1.92608900 |
| F | -1.01048700 | 0.68117500  | -1.99389800 |

|   |             |             |             |
|---|-------------|-------------|-------------|
| F | -2.94907800 | -0.24334200 | -2.31880900 |
| H | -4.86814600 | -3.28300000 | 0.33224400  |
| H | -7.33171500 | -2.98751400 | 0.07696600  |
| H | -8.31811600 | -0.73477200 | -0.13633600 |
| H | -7.99950100 | 1.76637500  | -0.22264900 |
| H | -6.47904800 | 3.70929600  | -0.15330300 |
| H | -4.01841100 | 3.39564100  | 0.10782400  |
| H | -1.24097800 | -0.33637300 | 0.61053600  |
| H | -2.16274200 | 1.80931300  | 0.37347700  |
| H | -2.66982700 | -2.19813500 | 0.49248500  |

42H (Charge = 1, Multiplicity = 2):

|   |             |             |             |
|---|-------------|-------------|-------------|
| C | -5.29492900 | -2.29058200 | 0.23153800  |
| C | -6.68765300 | -2.10717800 | 0.07604700  |
| C | -7.23547500 | -0.85538600 | -0.04023400 |
| C | -6.40813900 | 0.29900300  | -0.00288500 |
| C | -5.01011000 | 0.12819800  | 0.15337700  |
| C | -4.47425000 | -1.18619200 | 0.26523200  |
| C | -6.92552800 | 1.61797100  | -0.10838800 |
| C | -6.08500300 | 2.70031500  | -0.05752600 |
| C | -4.68887100 | 2.54286700  | 0.09555000  |
| C | -4.16563200 | 1.27373200  | 0.19518700  |
| N | -2.78599100 | 1.04245600  | 0.35699000  |
| C | -2.28967500 | -0.20844600 | 0.32774100  |
| N | -3.07943100 | -1.29384200 | 0.42600500  |
| C | -2.46585100 | -2.61534400 | 0.56122000  |
| C | -1.86487900 | 2.17767200  | 0.42125800  |
| C | -1.81429300 | -0.33205400 | -1.71871400 |
| F | -1.25063800 | -1.49391900 | -1.94922700 |
| F | -1.01893600 | 0.66415900  | -2.02709200 |
| F | -2.97729300 | -0.22813100 | -2.32007600 |
| H | -4.89146100 | -3.29124400 | 0.31945400  |
| H | -7.32567000 | -2.98417700 | 0.04840500  |
| H | -8.30623600 | -0.72464800 | -0.16058100 |
| H | -7.99626000 | 1.74945300  | -0.22812600 |
| H | -6.48701500 | 3.70474300  | -0.13748700 |
| H | -4.05113900 | 3.41699600  | 0.12888500  |
| H | -1.24643700 | -0.33057700 | 0.61169000  |
| H | -2.88327900 | -3.10902900 | 1.44096100  |
| H | -2.67276200 | -3.21248000 | -0.32990200 |
| H | -1.39131000 | -2.49456500 | 0.68655300  |
| H | -0.84887900 | 1.80553800  | 0.54207300  |
| H | -1.93723100 | 2.76481000  | -0.49699400 |
| H | -2.13101900 | 2.79891200  | 1.27882000  |

43H (Charge = 1, Multiplicity = 2):

|   |             |             |             |
|---|-------------|-------------|-------------|
| C | -4.93091000 | -0.56625600 | 0.25254200  |
| C | -3.79714300 | -1.06740900 | -0.40020900 |
| N | -3.68708300 | -2.39956000 | -0.51821700 |
| C | -4.56900800 | -3.36592700 | -0.01958400 |
| N | -5.64633100 | -2.81008600 | 0.64479900  |
| C | -5.88944600 | -1.48258200 | 0.71965400  |
| C | -2.69550300 | -0.25094800 | -0.98022000 |

|   |             |             |             |
|---|-------------|-------------|-------------|
| O | -4.38340900 | -4.54878700 | -0.14840900 |
| C | -5.29485300 | 0.86526500  | 0.42264400  |
| O | -6.41693700 | 1.19315100  | 0.74567500  |
| O | -4.29625100 | 1.70072500  | 0.19165200  |
| C | -3.34499400 | 3.86932200  | -0.02639600 |
| C | -4.60217800 | 3.11139800  | 0.32292200  |
| C | -7.40763700 | -1.14665700 | -0.83409200 |
| F | -7.00815500 | -0.24006700 | -1.68839400 |
| F | -8.50063300 | -0.79011400 | -0.21278000 |
| F | -7.51951500 | -2.32647600 | -1.39178100 |
| H | -2.87328900 | -2.78283500 | -0.99923700 |
| H | -6.30340800 | -3.46645700 | 1.06260100  |
| H | -6.65889600 | -1.17348000 | 1.42246600  |
| H | -3.10754200 | 0.47227400  | -1.68712800 |
| H | -2.20486400 | 0.31332500  | -0.18359800 |
| H | -1.96976400 | -0.89126500 | -1.48109500 |
| H | -3.53471700 | 4.94145400  | 0.06402100  |
| H | -2.53018700 | 3.60266500  | 0.65122600  |
| H | -3.03692400 | 3.65675000  | -1.05318600 |
| H | -5.42976700 | 3.34582400  | -0.35108500 |
| H | -4.92615900 | 3.29541400  | 1.35030300  |

44H (Charge = 1, Multiplicity = 2):

|   |             |             |             |
|---|-------------|-------------|-------------|
| C | -2.72166600 | -0.34686900 | -0.13904200 |
| C | -3.22258100 | 0.89805000  | 0.21768800  |
| N | -4.56931200 | 1.03021600  | 0.18118500  |
| C | -5.40386100 | 0.02806200  | -0.21274700 |
| N | -4.97690100 | -1.15169200 | -0.57864400 |
| C | -3.64482000 | -1.36963500 | -0.47904900 |
| C | -2.44182300 | 2.09751800  | 0.63232100  |
| C | -1.28886200 | -0.74977800 | -0.11605300 |
| O | -0.96509800 | -1.91786700 | -0.11954800 |
| O | -0.44837700 | 0.27227100  | -0.10120300 |
| C | 1.72308600  | 1.23912700  | -0.02524800 |
| C | 0.96098200  | -0.06266600 | -0.06610000 |
| C | -3.53936900 | -2.56870000 | 1.33820000  |
| F | -4.76879400 | -2.60836400 | 1.78807100  |
| F | -2.73121200 | -1.98894900 | 2.19092400  |
| F | -3.11002300 | -3.75184100 | 0.98372200  |
| O | -6.66488900 | 0.36480900  | -0.20346600 |
| C | -7.62084400 | -0.65816300 | -0.56277300 |
| H | -4.98897100 | 1.92457100  | 0.43975300  |
| H | -3.26941200 | -2.26501400 | -0.97154400 |
| H | -1.75252400 | 1.83217900  | 1.43561700  |
| H | -1.84512800 | 2.45285000  | -0.21134900 |
| H | -3.11094400 | 2.89132300  | 0.96586600  |
| H | 2.79479800  | 1.02824800  | -0.00061100 |
| H | 1.50825100  | 1.84188200  | -0.91107300 |
| H | 1.46147400  | 1.81349800  | 0.86698600  |
| H | 1.14459200  | -0.67917700 | 0.81745000  |
| H | 1.19399200  | -0.65160500 | -0.95686700 |
| H | -8.59171500 | -0.18160700 | -0.45310200 |
| H | -7.45449400 | -0.97256700 | -1.59333200 |

H -7.52272200 -1.50629000 0.11577400

45H (Charge = 1, Multiplicity = 2):

|   |             |             |             |
|---|-------------|-------------|-------------|
| C | -4.84844100 | -0.58267400 | 0.34871900  |
| C | -3.69367500 | -1.07518600 | -0.26772500 |
| N | -3.54391600 | -2.41171900 | -0.32601500 |
| C | -4.38771600 | -3.37072000 | 0.20200300  |
| N | -5.48637400 | -2.83271900 | 0.81307700  |
| C | -5.78202300 | -1.51173900 | 0.83715800  |
| S | -4.07498200 | -4.98725100 | 0.11840200  |
| C | -2.60685900 | -0.25577200 | -0.86820100 |
| C | -7.30385300 | -1.30302100 | -0.74958900 |
| F | -6.89030300 | -0.44773500 | -1.64730500 |
| F | -8.40644800 | -0.91712600 | -0.16798600 |
| F | -7.39304500 | -2.51714900 | -1.22939200 |
| C | -5.25981900 | 0.84394800  | 0.45409600  |
| O | -6.39581400 | 1.14503200  | 0.75176400  |
| O | -4.28594900 | 1.69810900  | 0.19537200  |
| C | -3.39622800 | 3.88345300  | -0.10345200 |
| C | -4.63442000 | 3.10424500  | 0.26570500  |
| H | -2.70972300 | -2.77825200 | -0.78489000 |
| H | -6.13240800 | -3.48686800 | 1.25275300  |
| H | -6.57563000 | -1.21184800 | 1.51679700  |
| H | -3.02938600 | 0.42739400  | -1.60795100 |
| H | -2.14195300 | 0.35243600  | -0.08829900 |
| H | -1.85739100 | -0.89479300 | -1.33442400 |
| H | -3.61814700 | 4.95228200  | -0.05944000 |
| H | -2.58118200 | 3.66936100  | 0.59225500  |
| H | -3.07165900 | 3.63789000  | -1.11770400 |
| H | -5.46162300 | 3.28546600  | -0.42486100 |
| H | -4.97372800 | 3.31941200  | 1.28199800  |

46H (Charge = 1, Multiplicity = 2):

|   |             |             |             |
|---|-------------|-------------|-------------|
| C | -5.67866700 | -3.52818300 | 0.65432500  |
| C | -5.97543500 | -3.14445400 | 1.98399800  |
| C | -6.19487700 | -1.82646700 | 2.32752900  |
| C | -6.11513800 | -0.86363400 | 1.31898800  |
| C | -5.81012400 | -1.21355100 | -0.01810400 |
| C | -5.60078900 | -2.58138300 | -0.33441300 |
| O | -6.33392600 | 0.41747100  | 1.66664700  |
| C | -6.26091100 | 1.41605700  | 0.76797500  |
| C | -5.96649900 | 1.15289200  | -0.59129900 |
| C | -5.78694200 | -0.18822800 | -0.98468800 |
| C | -6.47982100 | 2.71539500  | 1.23119200  |
| C | -6.41169500 | 3.74851700  | 0.31938900  |
| C | -6.13092700 | 3.51757900  | -1.04849000 |
| C | -5.91500600 | 2.24142900  | -1.50094900 |
| C | -8.11328200 | -0.54228300 | -1.70182100 |
| F | -8.26433000 | -1.78705000 | -2.07866600 |
| F | -8.42309300 | 0.30707700  | -2.64840100 |
| F | -8.74989700 | -0.28676500 | -0.58219700 |
| H | -5.51751300 | -4.57507000 | 0.42462200  |
| H | -6.03456700 | -3.90641300 | 2.75425600  |

|   |             |             |             |
|---|-------------|-------------|-------------|
| H | -6.42616900 | -1.52274600 | 3.34181200  |
| H | -5.38264300 | -2.84567100 | -1.36431500 |
| H | -5.50280900 | -0.41739400 | -2.01066600 |
| H | -6.69610100 | 2.88141800  | 2.28020100  |
| H | -6.57898500 | 4.76465500  | 0.66096300  |
| H | -6.09060100 | 4.35626600  | -1.73390200 |
| H | -5.70311800 | 2.03268500  | -2.54484000 |

47H (Charge = 1, Multiplicity = 2):

|   |             |             |             |
|---|-------------|-------------|-------------|
| C | -7.40127000 | 0.04151800  | 0.71308100  |
| C | -7.34417800 | 1.42228100  | 0.42291200  |
| C | -6.14300500 | 2.05683900  | 0.18424100  |
| C | -4.95058900 | 1.31572600  | 0.23377100  |
| C | -4.98529600 | -0.07315000 | 0.53277100  |
| C | -6.24507100 | -0.69274200 | 0.76267900  |
| S | -3.48496000 | 2.17034800  | -0.08931100 |
| C | -2.23639700 | 0.99198400  | 0.09526300  |
| C | -2.49912200 | -0.36845200 | 0.41000600  |
| C | -3.81335000 | -0.85793000 | 0.56309200  |
| C | -0.91456500 | 1.43199900  | -0.08534200 |
| C | 0.12163200  | 0.53063200  | 0.04236700  |
| C | -0.11829500 | -0.82666100 | 0.34914400  |
| C | -1.40364600 | -1.26828100 | 0.52559700  |
| C | -4.00776300 | -1.56101200 | -1.83830900 |
| F | -5.16988500 | -2.12441500 | -2.06132900 |
| F | -3.00784500 | -2.34657700 | -2.15494200 |
| F | -3.91245900 | -0.38880700 | -2.42678300 |
| H | -8.35975500 | -0.43162000 | 0.89320300  |
| H | -8.26221500 | 1.99919900  | 0.38457800  |
| H | -6.11616100 | 3.11830200  | -0.04047900 |
| H | -6.25974800 | -1.75633900 | 0.97957100  |
| H | -3.92342600 | -1.90888600 | 0.82820900  |
| H | -0.71401900 | 2.47178600  | -0.32293700 |
| H | 1.14095300  | 0.87497100  | -0.09777800 |
| H | 0.71525700  | -1.51353100 | 0.44051400  |
| H | -1.61863300 | -2.30718100 | 0.75621500  |

## Coordinate of Products

CF3 (Charge = 0, Multiplicity = 2):

|   |             |            |             |
|---|-------------|------------|-------------|
| C | -3.06793400 | 0.05417900 | 0.00000000  |
| F | -2.61141600 | 0.64474100 | 1.08619600  |
| F | -2.61141600 | 0.64474100 | -1.08619600 |
| F | -4.38528600 | 0.01755800 | 0.00000000  |

IH (Charge = 1, Multiplicity = 1):

|   |             |             |             |
|---|-------------|-------------|-------------|
| C | -2.11619200 | 0.66218800  | 0.55518500  |
| C | -2.66562600 | 1.67754800  | -0.22966700 |
| N | -3.80119600 | 1.37321500  | -0.89692100 |
| C | -4.47146000 | 0.19948100  | -0.89515500 |
| C | -3.92771100 | -0.82358300 | -0.11630800 |
| C | -2.75863000 | -0.57094200 | 0.59347900  |
| C | -2.14274300 | 3.06323100  | -0.42131000 |
| C | -5.70831200 | 0.14795000  | -1.72957300 |
| C | -4.50477200 | -2.20249800 | 0.02188200  |
| O | -3.97187200 | -3.05723300 | 0.69074900  |
| O | -5.63239100 | -2.36813900 | -0.65268400 |
| C | -7.50763500 | -3.63059300 | -1.38749200 |
| C | -6.24315500 | -3.67760200 | -0.56466700 |
| C | -0.86417500 | 0.78366800  | 1.37455300  |
| O | -0.41112700 | -0.15023900 | 1.99470800  |
| O | -0.33193900 | 1.99610100  | 1.34477300  |
| C | 1.30719000  | 3.61422200  | 1.93502800  |
| C | 0.88053100  | 2.17781600  | 2.11483300  |
| H | -4.19882300 | 2.11956500  | -1.46832700 |
| H | -2.33193500 | -1.36484100 | 1.19856400  |
| H | -1.12102600 | 3.02542900  | -0.80320300 |
| H | -2.77208600 | 3.61659500  | -1.11973800 |
| H | -2.11631300 | 3.58512900  | 0.53731000  |
| H | -5.87256900 | 1.10346600  | -2.22834700 |
| H | -5.62004600 | -0.64302500 | -2.47674400 |
| H | -6.56953500 | -0.08840600 | -1.10183900 |
| H | -8.00073700 | -4.60470200 | -1.34720200 |
| H | -8.19630400 | -2.87708300 | -0.99704700 |
| H | -7.28293200 | -3.39869900 | -2.43162200 |
| H | -5.52968000 | -4.41445200 | -0.94247700 |
| H | -6.44155200 | -3.89350400 | 0.48821100  |
| H | 2.22283300  | 3.79223500  | 2.50390100  |
| H | 1.50546400  | 3.83109600  | 0.88237200  |
| H | 0.53486400  | 4.29664700  | 2.29859200  |
| H | 0.66240500  | 1.93732600  | 3.15842400  |
| H | 1.62996700  | 1.47335400  | 1.74515600  |

2H (Charge = 1, Multiplicity = 1):

|   |             |             |             |
|---|-------------|-------------|-------------|
| C | -4.02017600 | 0.19679800  | 1.15000000  |
| C | -4.30407400 | 1.29228900  | 0.33152100  |
| N | -5.28144800 | 1.13419200  | -0.58217300 |
| C | -6.01206700 | 0.01993900  | -0.78007000 |
| C | -5.72678000 | -1.07622200 | 0.03727000  |
| C | -4.73003000 | -0.99328500 | 1.00669300  |



|   |             |             |             |
|---|-------------|-------------|-------------|
| C | -3.59030700 | 2.59345300  | 0.40440500  |
| C | -7.06452600 | 0.01904500  | -1.82951600 |
| C | -6.48491300 | -2.28330300 | -0.13684400 |
| N | -7.10097300 | -3.24977500 | -0.28375300 |
| C | -2.98459800 | 0.32153200  | 2.13715600  |
| N | -2.14882900 | 0.43241800  | 2.92732800  |
| H | -5.48663100 | 1.93626500  | -1.18340000 |
| H | -4.50990200 | -1.84489000 | 1.64161100  |
| H | -4.06076200 | 3.33502800  | -0.24056000 |
| H | -3.58771700 | 2.95408300  | 1.43621200  |
| H | -2.55055200 | 2.44962900  | 0.09367200  |
| H | -7.09473800 | 0.96970500  | -2.36213800 |
| H | -6.86956100 | -0.79155800 | -2.53742900 |
| H | -8.03593600 | -0.16900000 | -1.36202400 |

3H (Charge = 1, Multiplicity = 1):

|   |             |             |             |
|---|-------------|-------------|-------------|
| C | -3.72271000 | 0.47931400  | 0.64702700  |
| C | -4.26303200 | 1.48950400  | -0.14849600 |
| N | -5.38676200 | 1.18734800  | -0.83603200 |
| C | -6.06722100 | 0.01930100  | -0.82959200 |
| C | -5.54085300 | -1.00928900 | -0.04707900 |
| C | -4.36392000 | -0.75724800 | 0.65503800  |
| C | -3.71872900 | 2.86533800  | -0.35842000 |
| C | -7.28490100 | -0.02997200 | -1.69441400 |
| C | -6.11492000 | -2.40608600 | 0.09404900  |
| O | -5.36356400 | -3.28451200 | 0.46383600  |
| C | -7.56990800 | -2.67301600 | -0.16399900 |
| C | -2.46948700 | 0.58934000  | 1.49268100  |
| O | -1.88199400 | -0.43837700 | 1.75958800  |
| C | -2.01702600 | 1.91846400  | 2.02609500  |
| H | -5.76031200 | 1.92709700  | -1.43129200 |
| H | -3.93137000 | -1.56033900 | 1.24309300  |
| H | -2.65807400 | 2.81628500  | -0.61007000 |
| H | -4.24796200 | 3.36733800  | -1.16992500 |
| H | -3.83102100 | 3.46005800  | 0.55162500  |
| H | -7.37433200 | 0.88461400  | -2.28181100 |
| H | -7.22999300 | -0.87962700 | -2.37743800 |
| H | -8.18250900 | -0.13618200 | -1.08099900 |
| H | -7.81379300 | -3.65067700 | 0.25182000  |
| H | -8.19917200 | -1.90292200 | 0.28880300  |
| H | -7.76766000 | -2.68717300 | -1.23963400 |
| H | -1.32057000 | 1.73593000  | 2.84476100  |
| H | -1.49958100 | 2.48268800  | 1.24449100  |
| H | -2.86343100 | 2.51501900  | 2.37489400  |

4H (Charge = 1, Multiplicity = 1):

|   |             |             |             |
|---|-------------|-------------|-------------|
| C | -3.79430600 | 0.47555100  | 0.67930900  |
| C | -4.31342200 | 1.46918900  | -0.14784800 |
| N | -5.41949100 | 1.15635200  | -0.85827200 |
| C | -6.09723400 | -0.01216400 | -0.83393900 |
| C | -5.59526800 | -1.01453300 | -0.00762300 |
| C | -4.42332500 | -0.76586900 | 0.70048800  |
| C | -3.75641600 | 2.84098900  | -0.35425200 |

|   |             |             |             |
|---|-------------|-------------|-------------|
| C | -7.29572200 | -0.10458500 | -1.72215100 |
| C | -6.17884900 | -2.40338400 | 0.11669200  |
| O | -5.42613800 | -3.36044500 | 0.22148500  |
| N | -7.52151100 | -2.49494400 | 0.11843800  |
| C | -2.52828700 | 0.60197000  | 1.49619200  |
| O | -1.77573000 | -0.35742100 | 1.57898600  |
| N | -2.31161800 | 1.78375500  | 2.10257800  |
| H | -5.77563100 | 1.87622900  | -1.48884000 |
| H | -3.98907400 | -1.56554200 | 1.29282000  |
| H | -2.66698100 | 2.82224600  | -0.32083400 |
| H | -4.08270500 | 3.24435200  | -1.31463700 |
| H | -4.11450800 | 3.50956900  | 0.43534100  |
| H | -7.21158400 | 0.60323600  | -2.54886300 |
| H | -7.40159100 | -1.11347200 | -2.12016500 |
| H | -8.19923500 | 0.13969800  | -1.15356000 |
| H | -8.11506900 | -1.68392100 | 0.22188300  |
| H | -7.93427300 | -3.40669800 | 0.26761800  |
| H | -3.03265300 | 2.48615300  | 2.18779600  |
| H | -1.50513900 | 1.86052700  | 2.70914900  |

5H (Charge = 1, Multiplicity = 1):

|   |             |             |             |
|---|-------------|-------------|-------------|
| C | -2.05722400 | 0.84049900  | 0.46244300  |
| C | -2.59082900 | 1.87256200  | -0.29004900 |
| N | -3.71296200 | 1.65194700  | -0.99077300 |
| C | -4.36446800 | 0.47998200  | -1.01052900 |
| C | -3.86418200 | -0.57666400 | -0.26950500 |
| C | -2.70022400 | -0.39448000 | 0.47237700  |
| C | -4.54278700 | -1.91313900 | -0.24921300 |
| O | -4.11630800 | -2.84840500 | 0.38410800  |
| O | -5.63588500 | -1.92296700 | -0.99724800 |
| C | -7.55963200 | -2.96258700 | -1.93851500 |
| C | -6.36273900 | -3.17538300 | -1.04479700 |
| C | -0.80413800 | 1.01802700  | 1.26587700  |
| O | -0.32216400 | 0.12629500  | 1.92189600  |
| O | -0.31746600 | 2.24530300  | 1.15865300  |
| C | 1.27188300  | 3.95127900  | 1.64059100  |
| C | 0.89755800  | 2.51311500  | 1.90121500  |
| H | -2.16077800 | 2.86418300  | -0.35427000 |
| H | -4.09391300 | 2.42296200  | -1.54171600 |
| H | -5.26041800 | 0.42693800  | -1.61637800 |
| H | -2.29443800 | -1.21470500 | 1.05756300  |
| H | -8.13245900 | -3.89096300 | -1.99861700 |
| H | -8.20868900 | -2.18001000 | -1.53818000 |
| H | -7.24583800 | -2.68270400 | -2.94705800 |
| H | -5.68971200 | -3.94537600 | -1.43050300 |
| H | -6.64959900 | -3.44209000 | -0.02441600 |
| H | 2.18694300  | 4.18893100  | 2.18819600  |
| H | 1.45147800  | 4.11884200  | 0.57590000  |
| H | 0.48084800  | 4.62522800  | 1.97814100  |
| H | 0.69945800  | 2.32179100  | 2.95886400  |
| H | 1.66650400  | 1.81590400  | 1.55888800  |

6H (Charge = 1, Multiplicity = 1):

|   |             |             |             |
|---|-------------|-------------|-------------|
| C | -2.40189500 | 0.66773800  | 0.96217800  |
| C | -2.95434400 | 1.67861400  | 0.17605100  |
| N | -4.07135900 | 1.38918400  | -0.55313600 |
| C | -4.73708700 | 0.19998300  | -0.47787700 |
| C | -4.19033300 | -0.81162500 | 0.31117000  |
| C | -3.03435000 | -0.56420100 | 1.03650900  |
| C | -2.42958600 | 3.08024600  | 0.14258000  |
| C | -6.04760200 | 0.07685400  | -1.19012400 |
| C | -4.58438300 | 2.42099100  | -1.48606500 |
| C | -4.76420000 | -2.19461900 | 0.44000900  |
| O | -4.66029500 | -2.84075600 | 1.45592100  |
| O | -5.31491200 | -2.63398700 | -0.68377400 |
| C | -6.49616300 | -4.23895000 | -1.98347000 |
| C | -5.87166100 | -3.97018200 | -0.63607400 |
| C | -1.13064100 | 0.80185000  | 1.75269800  |
| O | -0.95142500 | 0.20407700  | 2.78754400  |
| O | -0.22928400 | 1.57021100  | 1.15549300  |
| C | 1.88719500  | 2.64738800  | 1.01745400  |
| C | 1.03386800  | 1.72015100  | 1.84791400  |
| H | -2.61830900 | -1.34331500 | 1.66770200  |
| H | -1.80729800 | 3.26185400  | 1.01433900  |
| H | -1.82272500 | 3.24830700  | -0.75336900 |
| H | -3.25401600 | 3.79477300  | 0.14593700  |
| H | -6.61798900 | 1.00232700  | -1.09909400 |
| H | -5.89374200 | -0.13765900 | -2.25304000 |
| H | -6.62762300 | -0.73460000 | -0.76019900 |
| H | -3.74781000 | 3.00476000  | -1.85653500 |
| H | -5.05864000 | 1.92871300  | -2.32894900 |
| H | -5.29909900 | 3.06295300  | -0.96765400 |
| H | -6.92341500 | -5.24451000 | -1.98823600 |
| H | -7.29456700 | -3.52202300 | -2.19107400 |
| H | -5.74819700 | -4.17617300 | -2.77755400 |
| H | -5.06247600 | -4.66847900 | -0.40741300 |
| H | -6.60354600 | -4.00942000 | 0.17469400  |
| H | 2.85361800  | 2.78405700  | 1.50841300  |
| H | 2.05928900  | 2.22904700  | 0.02279300  |
| H | 1.40973700  | 3.62493800  | 0.91298200  |
| H | 0.83418600  | 2.12199900  | 2.84459800  |
| H | 1.48340900  | 0.72976100  | 1.95630200  |

7H (Charge = 1, Multiplicity = 1):

|   |             |             |             |
|---|-------------|-------------|-------------|
| C | -2.05899300 | 0.56950300  | 0.61864600  |
| C | -2.62697100 | 1.59608400  | -0.11895000 |
| N | -3.77293900 | 1.39365200  | -0.79011300 |
| C | -4.40007400 | 0.20237200  | -0.76923900 |
| C | -3.87114700 | -0.85193400 | -0.04761800 |
| C | -2.68494900 | -0.66999600 | 0.65728100  |
| C | -4.36943500 | 2.48522300  | -1.59023400 |
| C | -4.54595200 | -2.19012100 | -0.00877600 |
| O | -4.10223100 | -3.12243300 | 0.61731000  |
| O | -5.65561800 | -2.20797400 | -0.73249600 |
| C | -7.59048200 | -3.26377900 | -1.63231700 |
| C | -6.37724700 | -3.46383200 | -0.75789700 |

|   |             |             |             |
|---|-------------|-------------|-------------|
| C | -0.78320900 | 0.76963100  | 1.37993700  |
| O | -0.26682500 | -0.11071600 | 2.02524300  |
| O | -0.31737200 | 2.00355100  | 1.25180600  |
| C | 1.26357500  | 3.73354900  | 1.66957500  |
| C | 0.91502100  | 2.29363000  | 1.95564000  |
| H | -2.18832400 | 2.58406300  | -0.18766400 |
| H | -5.31780900 | 0.12955100  | -1.34114100 |
| H | -2.25578700 | -1.48646300 | 1.23002800  |
| H | -5.40806100 | 2.60406800  | -1.28524400 |
| H | -3.81130100 | 3.39934200  | -1.40322400 |
| H | -4.30867100 | 2.20937100  | -2.64268600 |
| H | -8.16035700 | -4.19497900 | -1.67422200 |
| H | -8.23579500 | -2.48032700 | -1.22766100 |
| H | -7.29548000 | -2.99166300 | -2.64863200 |
| H | -5.70762500 | -4.23397100 | -1.14919100 |
| H | -6.64532600 | -3.72417400 | 0.26924900  |
| H | 2.19076000  | 3.98856000  | 2.18822400  |
| H | 1.41041100  | 3.89191900  | 0.59844300  |
| H | 0.47394600  | 4.40122300  | 2.02260700  |
| H | 0.75027400  | 2.11120900  | 3.02063400  |
| H | 1.68266800  | 1.60244900  | 1.59855600  |

8H (Charge = 1, Multiplicity = 1):

|   |             |             |             |
|---|-------------|-------------|-------------|
| C | -4.96559100 | 0.75159700  | 0.77043700  |
| C | -5.34380900 | 1.75951500  | -0.10555000 |
| N | -6.38884200 | 1.54821900  | -0.91493200 |
| C | -7.10620800 | 0.41829500  | -0.93756100 |
| C | -6.75569100 | -0.61055200 | -0.07454600 |
| C | -5.67422300 | -0.45113300 | 0.79410800  |
| C | -7.51626300 | -1.83052000 | -0.08630300 |
| N | -8.12450200 | -2.81208400 | -0.09483200 |
| C | -3.84850300 | 0.96260100  | 1.65070300  |
| N | -2.95401000 | 1.12664500  | 2.36237100  |
| H | -4.84211600 | 2.71669800  | -0.17702300 |
| H | -6.65934200 | 2.29936000  | -1.55469000 |
| H | -7.93168200 | 0.36640700  | -1.63753700 |
| H | -5.38964100 | -1.24619100 | 1.47492800  |

9H (Charge = 1, Multiplicity = 1):

|   |             |             |             |
|---|-------------|-------------|-------------|
| C | -4.14039400 | 0.89814800  | 0.31966300  |
| C | -4.72867100 | 1.73875400  | -0.60947900 |
| N | -5.83446900 | 1.33151100  | -1.25061700 |
| C | -6.43175300 | 0.14901300  | -1.03797000 |
| C | -5.88189700 | -0.72684600 | -0.11774900 |
| C | -4.71013900 | -0.35424800 | 0.53759400  |
| C | -6.45175300 | -2.09821200 | 0.16127600  |
| O | -5.71870800 | -2.97309400 | 0.59609700  |
| N | -7.75776600 | -2.26423700 | -0.11219800 |
| C | -2.86914700 | 1.24556200  | 1.05879700  |
| O | -2.16132000 | 0.34646300  | 1.48566000  |
| N | -2.59236400 | 2.55643700  | 1.17984800  |
| H | -4.34941200 | 2.71441400  | -0.88930000 |
| H | -6.23945800 | 1.95418300  | -1.95057900 |

|   |             |             |             |
|---|-------------|-------------|-------------|
| H | -7.31373300 | -0.05167200 | -1.63458000 |
| H | -4.23835100 | -1.04643000 | 1.22849600  |
| H | -8.37924100 | -1.48640200 | -0.28326800 |
| H | -8.17479700 | -3.16156900 | 0.09804100  |
| H | -3.28341200 | 3.27312700  | 1.00806200  |
| H | -1.77071200 | 2.81728500  | 1.70939500  |

10H (Charge = 1, Multiplicity = 1):

|   |             |             |             |
|---|-------------|-------------|-------------|
| C | -2.13856500 | 1.98719000  | 1.04721300  |
| C | -2.70620800 | 2.95261500  | 0.23810700  |
| N | -3.80401800 | 2.65094400  | -0.47649900 |
| C | -4.39974000 | 1.45083000  | -0.45519900 |
| C | -3.86362500 | 0.45446900  | 0.34133500  |
| C | -2.72287900 | 0.72574900  | 1.09770200  |
| C | -4.48183300 | -0.90827600 | 0.40806600  |
| O | -4.01217800 | -1.80729200 | 1.06401900  |
| O | -5.58292000 | -0.99037600 | -0.32673700 |
| C | -7.49480400 | -2.12933000 | -1.17134700 |
| C | -6.25443900 | -2.27295600 | -0.32395500 |
| H | -1.25419600 | 2.22543200  | 1.62392900  |
| H | -2.32505000 | 3.96024600  | 0.13296300  |
| H | -4.20737700 | 3.37708600  | -1.06908900 |
| H | -5.27989000 | 1.32814900  | -1.07317200 |
| H | -2.30441700 | -0.05886500 | 1.71992000  |
| H | -8.02764400 | -3.08287700 | -1.19365200 |
| H | -8.16155200 | -1.36931400 | -0.75675700 |
| H | -7.23513500 | -1.85308200 | -2.19617800 |
| H | -5.56448800 | -3.02066100 | -0.72386900 |
| H | -6.48886200 | -2.53447600 | 0.71102900  |

11H (Charge = 1, Multiplicity = 1):

|   |             |             |             |
|---|-------------|-------------|-------------|
| C | -4.90215900 | 1.06119600  | 0.54832400  |
| C | -5.57963500 | 1.81975700  | -0.38735700 |
| N | -6.73694400 | 1.36166600  | -0.89556500 |
| C | -7.29296700 | 0.19526400  | -0.55131300 |
| C | -6.64382900 | -0.59488900 | 0.38597300  |
| C | -5.43516400 | -0.16038100 | 0.94306200  |
| C | -7.22613800 | -1.85207600 | 0.77101900  |
| N | -7.68960400 | -2.86251000 | 1.08551400  |
| H | -3.97059100 | 1.42612400  | 0.96068800  |
| H | -5.23922900 | 2.78019500  | -0.75235200 |
| H | -7.22058300 | 1.93626100  | -1.58771800 |
| H | -8.22793100 | -0.07336700 | -1.02722500 |
| H | -4.92757100 | -0.77801200 | 1.67608600  |

12H (Charge = 1, Multiplicity = 1):

|   |             |             |             |
|---|-------------|-------------|-------------|
| C | -3.72457900 | 1.38018700  | 0.80951100  |
| C | -4.28844600 | 2.32900800  | -0.02238400 |
| N | -5.40772200 | 2.02566400  | -0.70007200 |
| C | -6.02853300 | 0.83894300  | -0.62057700 |
| C | -5.50204900 | -0.14478500 | 0.19874400  |
| C | -4.33685800 | 0.13695400  | 0.91801900  |
| C | -6.14745500 | -1.50304700 | 0.33776200  |

|   |             |             |             |
|---|-------------|-------------|-------------|
| O | -5.62400500 | -2.32131500 | 1.06356800  |
| C | -7.40892500 | -1.77513600 | -0.42848600 |
| H | -2.82250900 | 1.61905300  | 1.35813900  |
| H | -3.88786000 | 3.32329300  | -0.17329300 |
| H | -5.80909600 | 2.73809300  | -1.30996100 |
| H | -6.92412900 | 0.72706600  | -1.21920100 |
| H | -3.92294600 | -0.63369400 | 1.56051100  |
| H | -7.74466000 | -2.78922400 | -0.21552500 |
| H | -8.18523300 | -1.05828000 | -0.14226000 |
| H | -7.22955700 | -1.66129900 | -1.50235700 |

13H (Charge = 1, Multiplicity = 1):

|   |             |             |             |
|---|-------------|-------------|-------------|
| C | -4.26228300 | 1.49543800  | 0.47646400  |
| C | -4.91768200 | 2.22187300  | -0.49968700 |
| N | -5.99045400 | 1.68665900  | -1.10445400 |
| C | -6.48496000 | 0.47471900  | -0.80975500 |
| C | -5.87043300 | -0.28454300 | 0.16946800  |
| C | -4.73645800 | 0.22939900  | 0.80231000  |
| C | -6.33817300 | -1.66978900 | 0.54553500  |
| O | -5.55117800 | -2.45064100 | 1.05924300  |
| N | -7.62146900 | -1.96197300 | 0.26377500  |
| H | -3.39327700 | 1.91809500  | 0.96399500  |
| H | -4.62228500 | 3.21085800  | -0.82560300 |
| H | -6.45175100 | 2.22805600  | -1.83603000 |
| H | -7.34516600 | 0.15581700  | -1.38548200 |
| H | -4.23882800 | -0.37742900 | 1.55174400  |
| H | -8.30215500 | -1.25485100 | 0.02519200  |
| H | -7.96909400 | -2.87093900 | 0.53984000  |

14H (Charge = 1, Multiplicity = 1):

|   |             |             |             |
|---|-------------|-------------|-------------|
| C | -4.50181100 | 0.92990700  | 1.25669900  |
| C | -5.07115200 | 1.83958700  | 0.38812100  |
| N | -6.00557700 | 1.44548800  | -0.49966300 |
| C | -6.42225300 | 0.16847600  | -0.55913700 |
| C | -5.89157600 | -0.78293900 | 0.29584700  |
| C | -4.90590200 | -0.39869300 | 1.20290600  |
| C | -6.55009800 | 2.44520800  | -1.44141700 |
| C | -6.29405800 | -2.23752500 | 0.24965600  |
| O | -5.51985300 | -3.08698100 | 0.66451500  |
| N | -7.50301100 | -2.50914700 | -0.27723200 |
| H | -3.74965500 | 1.26783400  | 1.95810200  |
| H | -4.80388900 | 2.88945300  | 0.36573200  |
| H | -7.16487700 | -0.05428300 | -1.31651700 |
| H | -4.47069600 | -1.14687800 | 1.85688500  |
| H | -6.83761800 | 3.32973900  | -0.87485600 |
| H | -5.77567500 | 2.69338600  | -2.16703900 |
| H | -7.41665200 | 2.01899000  | -1.94109900 |
| H | -8.20630000 | -1.79760600 | -0.41677300 |
| H | -7.80800400 | -3.47369800 | -0.27533200 |

15H (Charge = 1, Multiplicity = 1):

|   |             |            |            |
|---|-------------|------------|------------|
| C | -5.15878700 | 0.41448700 | 1.14728700 |
| C | -5.34519100 | 1.57213500 | 0.41741700 |

|   |             |             |             |
|---|-------------|-------------|-------------|
| N | -6.21501500 | 1.56882200  | -0.60602100 |
| C | -6.93020500 | 0.49172500  | -0.97007800 |
| C | -6.77589500 | -0.68810300 | -0.26867300 |
| C | -5.88142500 | -0.72540600 | 0.79958200  |
| H | -4.45850300 | 0.41260800  | 1.97294900  |
| H | -4.83030400 | 2.50416600  | 0.61170100  |
| H | -6.34143400 | 2.43182400  | -1.13412800 |
| H | -7.59861100 | 0.61694200  | -1.81195200 |
| H | -7.34928700 | -1.55924100 | -0.55902200 |
| H | -5.74728000 | -1.64346200 | 1.36144500  |

16H (Charge = 1, Multiplicity = 1):

|   |             |             |             |
|---|-------------|-------------|-------------|
| C | -2.79496700 | 1.41887300  | -0.18186400 |
| C | -2.23719900 | 0.13142700  | 0.01849500  |
| C | -3.02345400 | -0.99442100 | 0.00322000  |
| C | -4.40659200 | -0.84313700 | -0.21630700 |
| C | -4.98773400 | 0.43209600  | -0.41720000 |
| C | -4.14097500 | 1.57002100  | -0.39526700 |
| N | -5.23468000 | -1.93452500 | -0.24079900 |
| C | -6.54386000 | -1.86470500 | -0.44044800 |
| C | -7.15942900 | -0.62606400 | -0.64113600 |
| C | -6.38423900 | 0.51170700  | -0.62975900 |
| H | -2.14559500 | 2.28725500  | -0.16464200 |
| H | -1.16998400 | 0.03437500  | 0.18706700  |
| H | -2.60986800 | -1.98639000 | 0.15398600  |
| H | -4.58337400 | 2.54889100  | -0.55024000 |
| H | -4.81387200 | -2.85299300 | -0.09942300 |
| H | -7.08351500 | -2.80354600 | -0.43685100 |
| H | -8.22863200 | -0.58867800 | -0.80302800 |
| H | -6.83435700 | 1.48798200  | -0.78462300 |

17H (Charge = 1, Multiplicity = 1):

|   |             |             |             |
|---|-------------|-------------|-------------|
| C | -0.71207400 | 1.23045500  | -0.02398900 |
| C | -0.22996400 | -0.08955400 | 0.15415000  |
| C | -1.08134700 | -1.16857400 | 0.13463700  |
| C | -2.45303700 | -0.93158700 | -0.06616900 |
| C | -2.96045800 | 0.37801000  | -0.24166300 |
| C | -2.04935700 | 1.46454200  | -0.21919000 |
| N | -3.34754600 | -1.97161700 | -0.10335800 |
| C | -4.64676700 | -1.82093300 | -0.28790300 |
| C | -5.19807300 | -0.54140200 | -0.44552700 |
| C | -4.35119100 | 0.54672300  | -0.43194200 |
| C | -6.68704100 | -0.48885900 | -0.67134300 |
| O | -7.28334000 | -1.50624000 | -0.99970000 |
| N | -7.27533900 | 0.70891600  | -0.50832200 |
| H | -0.01218800 | 2.05851300  | -0.00407600 |
| H | 0.83159600  | -0.25123300 | 0.30805500  |
| H | -0.72490400 | -2.18472300 | 0.26788000  |
| H | -2.43490400 | 2.46968400  | -0.35563000 |
| H | -2.98212700 | -2.91767100 | 0.01307400  |
| H | -5.25792800 | -2.71509200 | -0.31211900 |
| H | -4.72681500 | 1.55564300  | -0.58038400 |
| H | -6.80858200 | 1.49410800  | -0.07794800 |

H -8.27855400 0.76212100 -0.62367000

18H (Charge = 1, Multiplicity = 1):

C -1.18205300 2.28869600 -0.33853600  
C -0.36805700 1.13943300 -0.22867500  
C -0.91183200 -0.12276000 -0.14973100  
C -2.31330000 -0.26331100 -0.18133500  
C -3.14575700 0.87966800 -0.28856800  
C -2.54714700 2.16167000 -0.36801300  
N -2.91677500 -1.50888900 -0.11242900  
C -4.23318600 -1.64151800 -0.14521500  
C -5.09839500 -0.54105900 -0.24199200  
C -4.54950200 0.71724100 -0.31752100  
C -2.07436900 -2.71410500 -0.00679300  
C -6.56720300 -0.88131900 -0.28897500  
O -6.91099100 -2.05401000 -0.37400100  
N -7.43138200 0.14532000 -0.24630600  
H -0.72153400 3.26838400 -0.39890300  
H 0.71074700 1.25058200 -0.20586600  
H -0.26724400 -0.98812300 -0.06717000  
H -3.19501200 3.02841000 -0.45043700  
H -4.63450400 -2.64717600 -0.09751000  
H -5.15874800 1.61218100 -0.40885400  
H -2.72553300 -3.58363500 0.02583200  
H -1.42181100 -2.76785100 -0.87850800  
H -1.48335800 -2.65546900 0.90732700  
H -7.15701200 1.10278100 -0.08899600  
H -8.41944900 -0.06870300 -0.26134600

19H (Charge = 1, Multiplicity = 1):

C -1.54202700 1.61749800 -0.27965900  
C -0.88779300 0.37754200 -0.07697700  
C -1.59233100 -0.80173700 -0.01150000  
C -2.98913900 -0.74987100 -0.15054500  
C -3.66761300 0.47860600 -0.35321900  
C -2.90544400 1.67285000 -0.41556900  
N -3.74082200 -1.89694300 -0.09475800  
C -5.05393900 -1.93209100 -0.21844500  
C -5.75966200 -0.73428100 -0.42025700  
C -5.07016600 0.46432700 -0.48634800  
C -7.18869300 -0.77962500 -0.55496100  
N -8.33871900 -0.81252200 -0.66537400  
H -0.95349100 2.52682800 -0.32620500  
H 0.19155900 0.35835000 0.02868900  
H -1.10221900 -1.75754300 0.14229300  
H -3.42395900 2.61303300 -0.57169900  
H -3.24983300 -2.78090800 0.05144000  
H -5.53642800 -2.90007800 -0.15782000  
H -5.60498500 1.39644400 -0.64312700

20H (Charge = 1, Multiplicity = 1):

C 1.23931700 1.59110300 -0.21627300  
C 1.97390000 0.38266900 -0.13637800



|   |             |             |             |
|---|-------------|-------------|-------------|
| C | 1.34041000  | -0.83645000 | -0.08012600 |
| C | -0.06492500 | -0.85814700 | -0.10377700 |
| C | -0.82301200 | 0.33621400  | -0.18401200 |
| C | -0.13202100 | 1.57350300  | -0.24040600 |
| N | -0.74784100 | -2.04794100 | -0.04941700 |
| C | -2.06452000 | -2.14495200 | -0.06810700 |
| C | -2.85114600 | -0.98829600 | -0.14406800 |
| C | -2.23234400 | 0.24349600  | -0.20210100 |
| C | -4.33293000 | -1.17634400 | -0.16076100 |
| O | -4.85537100 | -2.26755300 | -0.14302900 |
| O | -4.98213700 | -0.02086200 | -0.19507400 |
| C | -6.95908700 | 1.30442800  | -0.21814500 |
| C | -6.42657000 | -0.10757800 | -0.21436200 |
| H | 1.77242800  | 2.53431100  | -0.25803900 |
| H | 3.05785600  | 0.42048300  | -0.11882600 |
| H | 1.89264800  | -1.76864200 | -0.01876800 |
| H | -0.71068800 | 2.48937800  | -0.30066500 |
| H | -0.20091300 | -2.90872300 | 0.00765300  |
| H | -2.49411500 | -3.13865700 | -0.02256700 |
| H | -2.82329500 | 1.15267400  | -0.26248700 |
| H | -8.05125400 | 1.27712600  | -0.23335300 |
| H | -6.63823800 | 1.84195500  | 0.67748000  |
| H | -6.61345200 | 1.84762700  | -1.10100900 |
| H | -6.72459800 | -0.66403000 | -1.10690900 |
| H | -6.74859600 | -0.66768900 | 0.66724200  |

21H (Charge = 1, Multiplicity = 1):

|   |             |             |             |
|---|-------------|-------------|-------------|
| C | -0.06980100 | 0.40896300  | 0.98045300  |
| C | -0.04429700 | 1.16408700  | -0.22610200 |
| C | -1.18130200 | 1.39042000  | -0.95570400 |
| C | -2.40456400 | 0.85584800  | -0.48920800 |
| C | -2.45462200 | 0.09764600  | 0.71714100  |
| C | -1.24438100 | -0.11182900 | 1.44251500  |
| N | -3.55361200 | 1.05315800  | -1.17828600 |
| C | -4.76435000 | 0.57990900  | -0.79827000 |
| C | -4.85349400 | -0.18081200 | 0.40400800  |
| C | -3.68722200 | -0.40710700 | 1.13894800  |
| C | -5.91597400 | 0.83588700  | -1.57742000 |
| C | -7.12034600 | 0.33994500  | -1.15355000 |
| C | -7.23388600 | -0.42164600 | 0.04382200  |
| C | -6.12931800 | -0.67746400 | 0.80475300  |
| H | 0.85280500  | 0.25228500  | 1.52789400  |
| H | 0.89962500  | 1.56960300  | -0.57504900 |
| H | -1.16796800 | 1.96584300  | -1.87560100 |
| H | -1.28832600 | -0.69016300 | 2.35977700  |
| H | -3.50478000 | 1.59459600  | -2.04167600 |
| H | -3.73952800 | -0.98676700 | 2.05748100  |
| H | -5.82338000 | 1.41784700  | -2.48859800 |
| H | -8.01043800 | 0.53207800  | -1.74361500 |
| H | -8.20598600 | -0.79602700 | 0.34416700  |
| H | -6.19103100 | -1.25606300 | 1.72082800  |

22H (Charge = 1, Multiplicity = 1):

|   |             |             |             |
|---|-------------|-------------|-------------|
| C | -0.13063700 | 0.42452800  | 1.37852100  |
| C | -0.09926600 | 1.18408300  | 0.18028400  |
| C | -1.21214600 | 1.35800100  | -0.60283000 |
| C | -2.44319400 | 0.76982400  | -0.21189500 |
| C | -2.49228900 | 0.03437000  | 1.01183600  |
| C | -1.30672200 | -0.13332000 | 1.78616000  |
| N | -3.57950500 | 0.90007000  | -0.96585700 |
| C | -4.79739000 | 0.45708500  | -0.52189800 |
| C | -4.87196700 | -0.28272900 | 0.69869900  |
| C | -3.70801200 | -0.49924300 | 1.43111300  |
| C | -5.99918800 | 0.71987400  | -1.23001200 |
| C | -7.18947100 | 0.23706600  | -0.74850200 |
| C | -7.26743200 | -0.52910300 | 0.44335800  |
| C | -6.12974200 | -0.77789400 | 1.15311700  |
| C | -3.48234000 | 1.53836400  | -2.29111700 |
| H | 0.77354800  | 0.30545800  | 1.96444600  |
| H | 0.83100100  | 1.65134400  | -0.12600100 |
| H | -1.14159600 | 1.96999400  | -1.49083700 |
| H | -1.37834500 | -0.70658000 | 2.70499600  |
| H | -3.75254800 | -1.07465700 | 2.35248900  |
| H | -6.00111200 | 1.32220900  | -2.12727100 |
| H | -8.09989500 | 0.45819100  | -1.29611000 |
| H | -8.22782800 | -0.89762100 | 0.78512600  |
| H | -6.14652200 | -1.34493500 | 2.07848300  |
| H | -2.51881300 | 1.29673600  | -2.73039200 |
| H | -4.24739500 | 1.12994600  | -2.94340300 |
| H | -3.59879000 | 2.61985500  | -2.19727700 |

23H (Charge = 1, Multiplicity = 1):

|   |             |             |             |
|---|-------------|-------------|-------------|
| N | -0.00389900 | -0.99943000 | 0.32366000  |
| C | 0.17967800  | 0.28325400  | -0.15627200 |
| N | -0.97423100 | 1.02873700  | -0.41768900 |
| C | -2.23536300 | 0.59097400  | -0.20698100 |
| C | -2.41496100 | -0.70486300 | 0.33729400  |
| C | -1.24099100 | -1.56122100 | 0.61694000  |
| N | -3.28509900 | 1.36176400  | -0.52049800 |
| C | -4.58399500 | 0.96911600  | -0.18806000 |
| C | -4.79432700 | -0.32307100 | 0.35478800  |
| C | -3.67818900 | -1.15641100 | 0.59260600  |
| C | -5.67945900 | 1.83160000  | -0.36604500 |
| C | -6.94549000 | 1.38979500  | -0.03648100 |
| C | -7.17157400 | 0.09640200  | 0.47146500  |
| C | -6.10600600 | -0.74678100 | 0.66960800  |
| C | -3.05872200 | 2.63345800  | -1.23085600 |
| O | -1.35358000 | -2.68177400 | 1.06874000  |
| O | 1.27179800  | 0.76316200  | -0.35261000 |
| C | 1.21641600  | -1.77180000 | 0.57057100  |
| H | -0.77785000 | 1.98133200  | -0.71042400 |
| H | -3.81702200 | -2.15393700 | 0.99987300  |
| H | -5.54994900 | 2.84284300  | -0.72650500 |
| H | -7.78310200 | 2.06654200  | -0.16836800 |
| H | -8.17901800 | -0.22110100 | 0.71494600  |
| H | -6.23869900 | -1.74425400 | 1.07623300  |

|   |             |             |             |
|---|-------------|-------------|-------------|
| H | -3.93088300 | 2.85815800  | -1.83615000 |
| H | -2.86918000 | 3.43611400  | -0.51595600 |
| H | -2.21806200 | 2.51242200  | -1.91253400 |
| H | 1.78691500  | -1.31216500 | 1.37893500  |
| H | 0.91995500  | -2.77960900 | 0.84719700  |
| H | 1.81999600  | -1.79047300 | -0.33652400 |

24H (Charge = 1, Multiplicity = 1):

|   |             |             |             |
|---|-------------|-------------|-------------|
| N | 0.00245700  | -1.16569700 | 0.24250700  |
| C | 0.17043000  | 0.18080400  | -0.02845800 |
| N | -0.98331000 | 0.99004700  | -0.08859900 |
| C | -2.23177300 | 0.45190400  | -0.01960200 |
| C | -2.38527900 | -0.87672500 | 0.45738900  |
| C | -1.19773900 | -1.73746300 | 0.63383400  |
| N | -3.31624200 | 1.15216500  | -0.39821600 |
| C | -4.60046100 | 0.71630600  | -0.06107400 |
| C | -4.77369400 | -0.56592300 | 0.51156600  |
| C | -3.63196000 | -1.37372600 | 0.70992600  |
| C | -5.72050900 | 1.53245000  | -0.29426500 |
| C | -6.97443900 | 1.06566500  | 0.04686700  |
| C | -7.16123900 | -0.21230400 | 0.60849300  |
| C | -6.07266900 | -1.01855800 | 0.83669000  |
| C | -3.21184700 | 2.28220300  | -1.34969500 |
| O | -1.27152300 | -2.87904700 | 1.03986400  |
| O | 1.26422600  | 0.67274800  | -0.18646200 |
| C | 1.22119400  | -1.97720700 | 0.29040100  |
| C | -0.71485600 | 2.43494400  | 0.07092100  |
| H | -3.73369500 | -2.38931000 | 1.08192900  |
| H | -5.61194500 | 2.52581900  | -0.70980200 |
| H | -7.83359700 | 1.70671200  | -0.12026600 |
| H | -8.15970300 | -0.55095000 | 0.86059300  |
| H | -6.17969600 | -2.00806900 | 1.26934000  |
| H | -3.97952200 | 2.13320900  | -2.10735200 |
| H | -3.35777500 | 3.23860200  | -0.84788300 |
| H | -2.24328900 | 2.24412400  | -1.83806600 |
| H | 1.84581900  | -1.72259700 | -0.56363900 |
| H | 1.76837800  | -1.78320300 | 1.21530600  |
| H | 0.92642900  | -3.02238900 | 0.24626200  |
| H | 0.10790800  | 2.53371600  | 0.77629600  |
| H | -0.43589300 | 2.89795000  | -0.87497200 |
| H | -1.59971900 | 2.90922400  | 0.48865600  |

25H (Charge = 1, Multiplicity = 1):

|   |             |             |             |
|---|-------------|-------------|-------------|
| C | -2.26603300 | 0.88395800  | 0.95418200  |
| C | -2.55454300 | 2.20335200  | 1.37757900  |
| C | -3.82816200 | 2.69124100  | 1.26263600  |
| C | -4.84634500 | 1.86313800  | 0.72256000  |
| C | -4.56480000 | 0.52562400  | 0.30387400  |
| C | -3.23466700 | 0.05834000  | 0.43181000  |
| C | -6.14850500 | 2.36292700  | 0.59068500  |
| N | -7.10043800 | 1.60235800  | 0.07573600  |
| C | -6.89193900 | 0.32416000  | -0.34422800 |
| C | -5.65103700 | -0.23810600 | -0.23814000 |

|   |             |             |             |
|---|-------------|-------------|-------------|
| C | -5.49578200 | -1.66827800 | -0.66722800 |
| O | -4.61675400 | -2.40259300 | -0.27914800 |
| O | -6.45756500 | -2.02604600 | -1.51419300 |
| C | -7.09693700 | -4.28895200 | -0.86917300 |
| C | -6.46835900 | -3.41244500 | -1.93117100 |
| H | -1.25001600 | 0.51304300  | 1.04351900  |
| H | -1.76332900 | 2.82195600  | 1.78620800  |
| H | -4.08297200 | 3.70051300  | 1.56980600  |
| H | -2.98716100 | -0.94626900 | 0.12010700  |
| H | -6.42301500 | 3.36703200  | 0.89441000  |
| H | -8.04049900 | 1.98784500  | -0.00889800 |
| H | -7.75414400 | -0.19183200 | -0.74304800 |
| H | -7.15071900 | -5.31728900 | -1.23595700 |
| H | -6.50250100 | -4.27996000 | 0.04724900  |
| H | -8.11049900 | -3.94920900 | -0.64197900 |
| H | -7.05396100 | -3.40958800 | -2.85060800 |
| H | -5.44359100 | -3.71473900 | -2.15505200 |

26H (Charge = 1, Multiplicity = 1):

|   |             |             |             |
|---|-------------|-------------|-------------|
| C | -2.46887300 | -0.18011800 | 0.15220900  |
| C | -2.53684100 | 1.21495900  | -0.08172900 |
| C | -3.74993700 | 1.81570900  | -0.28731500 |
| C | -4.93039400 | 1.02896200  | -0.26088500 |
| C | -4.86918000 | -0.37672600 | -0.02080800 |
| C | -3.59788300 | -0.96447800 | 0.18521700  |
| C | -6.18016400 | 1.63041000  | -0.47102000 |
| N | -7.27741800 | 0.89420000  | -0.45679700 |
| C | -7.27542000 | -0.45460900 | -0.24687900 |
| C | -6.09869800 | -1.11093100 | -0.02879800 |
| C | -6.13217800 | -2.59179200 | 0.27010000  |
| O | -5.44728000 | -3.06612100 | 1.16577700  |
| N | -6.98291600 | -3.30757100 | -0.48801800 |
| H | -1.49897800 | -0.64107600 | 0.30937600  |
| H | -1.62479700 | 1.80114400  | -0.09927800 |
| H | -3.83471600 | 2.88160500  | -0.47378100 |
| H | -3.52680300 | -2.02745400 | 0.37394100  |
| H | -6.29597400 | 2.69363400  | -0.64999700 |
| H | -8.17509300 | 1.35373800  | -0.60548100 |
| H | -8.24698700 | -0.93167800 | -0.24914100 |
| H | -7.42866500 | -2.92288000 | -1.30879000 |
| H | -7.04710400 | -4.30430200 | -0.32735300 |

27H (Charge = 1, Multiplicity = 1):

|   |             |             |             |
|---|-------------|-------------|-------------|
| C | -1.29194900 | -0.30281600 | 0.32144000  |
| C | -1.39342100 | 1.09946400  | 0.15718500  |
| C | -2.61603000 | 1.67775500  | -0.06264300 |
| C | -3.77251800 | 0.85926700  | -0.11899600 |
| C | -3.67729400 | -0.55026500 | 0.05541000  |
| C | -2.39957700 | -1.11713900 | 0.27500600  |
| C | -5.03204100 | 1.44046600  | -0.34687300 |
| N | -6.12555800 | 0.70009100  | -0.41015300 |
| C | -6.07210900 | -0.66243500 | -0.25779100 |
| C | -4.89093400 | -1.30396800 | -0.02956400 |

|   |             |             |             |
|---|-------------|-------------|-------------|
| C | -7.44641700 | 1.31420000  | -0.63608100 |
| C | -4.90532700 | -2.79612400 | 0.20912600  |
| O | -4.24136600 | -3.29063800 | 1.10960400  |
| N | -5.71519700 | -3.49874800 | -0.60406300 |
| H | -0.31491000 | -0.74487100 | 0.48828700  |
| H | -0.49891600 | 1.71080900  | 0.20252100  |
| H | -2.72299800 | 2.74920500  | -0.19835900 |
| H | -2.30670100 | -2.18662900 | 0.41127100  |
| H | -5.14941900 | 2.51106000  | -0.47746800 |
| H | -7.02678200 | -1.17210100 | -0.31189200 |
| H | -7.87694400 | 0.88463100  | -1.54040200 |
| H | -8.07964600 | 1.09548100  | 0.22377300  |
| H | -7.31854900 | 2.38819400  | -0.74954500 |
| H | -6.13797400 | -3.09165200 | -1.42613800 |
| H | -5.76235800 | -4.50222000 | -0.48519100 |

28H (Charge = 1, Multiplicity = 1):

|   |             |             |             |
|---|-------------|-------------|-------------|
| C | -2.48401200 | -0.69728600 | -0.22772300 |
| C | -2.54184500 | 0.70312300  | -0.43306700 |
| C | -3.75230100 | 1.33872000  | -0.52371900 |
| C | -4.94518500 | 0.57936800  | -0.41036200 |
| C | -4.88462500 | -0.82934900 | -0.20391900 |
| C | -3.62554800 | -1.45671800 | -0.11356800 |
| C | -6.20019300 | 1.19746000  | -0.49931600 |
| N | -7.30787600 | 0.47795900  | -0.39233400 |
| C | -7.31860300 | -0.86821000 | -0.19555500 |
| C | -6.12709900 | -1.53169300 | -0.09969600 |
| C | -6.13972900 | -2.95286800 | 0.10733800  |
| N | -6.12712200 | -4.09679100 | 0.27318200  |
| H | -1.51518300 | -1.18091700 | -0.15939100 |
| H | -1.62044400 | 1.26811300  | -0.51792700 |
| H | -3.82414900 | 2.40990500  | -0.68124700 |
| H | -3.56676600 | -2.52883700 | 0.04344000  |
| H | -6.31730400 | 2.26424900  | -0.65541300 |
| H | -8.20738900 | 0.95522700  | -0.45919400 |
| H | -8.28721100 | -1.34459300 | -0.12472200 |

29H (Charge = 1, Multiplicity = 1):

|   |             |             |             |
|---|-------------|-------------|-------------|
| C | -6.89796000 | 1.78712000  | -0.34636200 |
| C | -6.03563500 | 2.89799900  | -0.43723200 |
| C | -4.67520400 | 2.70269300  | -0.44781200 |
| C | -4.15969900 | 1.38964800  | -0.36374300 |
| C | -5.02109100 | 0.26550700  | -0.26782200 |
| C | -6.40935600 | 0.49811400  | -0.26422500 |
| C | -2.75919100 | 1.18640300  | -0.37847500 |
| N | -2.25876800 | -0.02056800 | -0.30138700 |
| C | -3.02478000 | -1.17496600 | -0.19873800 |
| C | -4.42829000 | -1.05642100 | -0.17671100 |
| C | -2.37531100 | -2.41560100 | -0.11866800 |
| C | -3.13720400 | -3.55825200 | -0.01275800 |
| C | -4.54117700 | -3.47060900 | 0.01568200  |
| C | -5.17473900 | -2.24819300 | -0.06407500 |
| H | -7.97128700 | 1.94750200  | -0.34063300 |

|   |             |             |             |
|---|-------------|-------------|-------------|
| H | -6.44756000 | 3.89896700  | -0.49951900 |
| H | -3.98335900 | 3.53622300  | -0.51912200 |
| H | -7.10465700 | -0.33004200 | -0.19793600 |
| H | -2.05820900 | 2.01099800  | -0.45445400 |
| H | -1.24446800 | -0.13052300 | -0.31978200 |
| H | -1.29059500 | -2.45228200 | -0.14116000 |
| H | -2.65239900 | -4.52619700 | 0.05000500  |
| H | -5.13276000 | -4.37560300 | 0.10163800  |
| H | -6.25725100 | -2.20668900 | -0.03822600 |

30H (Charge = 1, Multiplicity = 1):

|   |             |             |             |
|---|-------------|-------------|-------------|
| C | -7.03948800 | 1.62746000  | 0.00894500  |
| C | -6.24939000 | 2.78232500  | -0.15729100 |
| C | -4.88719100 | 2.65944700  | -0.29596100 |
| C | -4.30071000 | 1.37436400  | -0.27047900 |
| C | -5.08596000 | 0.21063800  | -0.10492500 |
| C | -6.47790700 | 0.36590300  | 0.03583000  |
| C | -2.89898100 | 1.24661400  | -0.41631400 |
| N | -2.28953700 | 0.08540900  | -0.40921900 |
| C | -3.00093600 | -1.11579200 | -0.24879200 |
| C | -4.40456000 | -1.06968400 | -0.09280200 |
| C | -2.31317900 | -2.34140200 | -0.24399700 |
| C | -3.01968500 | -3.51518400 | -0.08300800 |
| C | -4.41379300 | -3.49062700 | 0.07441300  |
| C | -5.09082900 | -2.29008200 | 0.06881700  |
| C | -0.82586800 | 0.04197900  | -0.57130600 |
| H | -8.11430200 | 1.73085500  | 0.11805100  |
| H | -6.71752500 | 3.76012100  | -0.17524900 |
| H | -4.24969500 | 3.52852100  | -0.42580500 |
| H | -7.11853900 | -0.49800300 | 0.16460100  |
| H | -2.27904800 | 2.12842000  | -0.54113700 |
| H | -1.23866800 | -2.37527300 | -0.36499300 |
| H | -2.48789300 | -4.46025800 | -0.07878200 |
| H | -4.96113100 | -4.41835700 | 0.20093500  |
| H | -6.16726800 | -2.28484600 | 0.19145500  |
| H | -0.46539200 | 1.06208800  | -0.67751600 |
| H | -0.38257200 | -0.42075100 | 0.31053500  |
| H | -0.58294800 | -0.53370600 | -1.46473200 |

31H (Charge = 1, Multiplicity = 1):

|   |             |             |            |
|---|-------------|-------------|------------|
| C | -0.69124800 | -0.91909200 | 0.35733700 |
| C | -0.26597700 | 0.40549500  | 0.23405300 |
| C | -1.18620400 | 1.43964300  | 0.12590000 |
| C | -2.55620300 | 1.14147200  | 0.14250100 |
| C | -2.99564100 | -0.20338800 | 0.26651000 |
| C | -2.05122600 | -1.25217700 | 0.37624900 |
| C | -3.54389300 | 2.15378000  | 0.03727200 |
| N | -4.82030400 | 1.85354400  | 0.05401300 |
| C | -5.32171700 | 0.55936200  | 0.17125300 |
| C | -4.38509300 | -0.49046000 | 0.28098600 |
| C | -6.69003600 | 0.31465100  | 0.17848000 |
| C | -7.12767100 | -1.00257100 | 0.29998100 |
| C | -6.22580200 | -2.05825700 | 0.41209100 |

|   |             |             |             |
|---|-------------|-------------|-------------|
| C | -4.84524800 | -1.82607700 | 0.40447500  |
| C | -3.86348600 | -2.87691700 | 0.51615000  |
| C | -2.53471200 | -2.60495900 | 0.50262800  |
| H | 0.04366000  | -1.71482500 | 0.44171100  |
| H | 0.79546300  | 0.62666000  | 0.22262400  |
| H | -0.86259700 | 2.47126300  | 0.03053500  |
| H | -3.28480700 | 3.20287100  | -0.05994100 |
| H | -5.49675400 | 2.61346300  | -0.02551400 |
| H | -7.39085700 | 1.13858200  | 0.09066900  |
| H | -8.19297600 | -1.20586000 | 0.30704600  |
| H | -6.59022700 | -3.07653700 | 0.50672300  |
| H | -4.21869900 | -3.89838300 | 0.61229100  |
| H | -1.80401600 | -3.40358300 | 0.58793000  |

32H (Charge = 1, Multiplicity = 1):

|   |             |             |             |
|---|-------------|-------------|-------------|
| C | -6.72204800 | 0.44376800  | 0.38113400  |
| C | -7.07135600 | -0.79956900 | -0.21520400 |
| C | -6.14536700 | -1.78573000 | -0.51082600 |
| C | -4.76760100 | -1.57854100 | -0.21764300 |
| C | -4.45459100 | -0.35506500 | 0.36560700  |
| C | -5.39034900 | 0.63697800  | 0.66330900  |
| C | -3.65787300 | -2.43762100 | -0.43295700 |
| C | -2.37337900 | -2.04067400 | -0.07187700 |
| C | -2.09648600 | -0.78802600 | 0.51759400  |
| C | -3.16762500 | 0.06990300  | 0.73875300  |
| C | -3.35907000 | 1.38544700  | 1.28775500  |
| N | -4.64366200 | 1.69008000  | 1.23402400  |
| H | -7.48115800 | 1.18815200  | 0.59475000  |
| H | -8.11647600 | -0.97375400 | -0.44561700 |
| H | -6.46968000 | -2.71611600 | -0.96642600 |
| H | -3.81013500 | -3.41421600 | -0.88348800 |
| H | -1.54806800 | -2.72079300 | -0.24994600 |
| H | -1.07867800 | -0.52070600 | 0.78205200  |
| H | -2.63583500 | 2.07865100  | 1.69795600  |
| H | -5.03510800 | 2.56808200  | 1.56830000  |

33H (Charge = 1, Multiplicity = 1):

|   |             |             |             |
|---|-------------|-------------|-------------|
| C | -4.95346200 | 2.63756900  | 1.35419000  |
| C | -5.15191200 | 3.19944700  | 0.08582100  |
| C | -5.83636800 | 2.49428500  | -0.88622300 |
| C | -6.32560700 | 1.21817800  | -0.59085700 |
| C | -6.12538700 | 0.65272100  | 0.67835300  |
| C | -5.43428800 | 1.37437400  | 1.65531900  |
| N | -7.02144300 | 0.49329000  | -1.55911700 |
| C | -7.50874400 | -0.71101400 | -1.34321500 |
| C | -7.33692300 | -1.31901200 | -0.10408800 |
| N | -6.63893500 | -0.63207700 | 0.90343400  |
| C | -7.72077200 | -2.55940500 | 0.41131800  |
| C | -7.25177100 | -2.61251200 | 1.72261000  |
| C | -6.58915200 | -1.41501300 | 2.00008900  |
| H | -4.41737300 | 3.19478200  | 2.11448700  |
| H | -4.76976400 | 4.18933200  | -0.13635700 |
| H | -6.00532100 | 2.90627500  | -1.87614700 |

|   |             |             |             |
|---|-------------|-------------|-------------|
| H | -5.27853200 | 0.94901500  | 2.63994600  |
| H | -7.15331900 | 0.92357000  | -2.47246300 |
| H | -8.03733000 | -1.20115900 | -2.15214700 |
| H | -8.27448200 | -3.31283200 | -0.13027000 |
| H | -7.36725100 | -3.42771300 | 2.42190000  |
| H | -6.09425000 | -1.09418000 | 2.90454300  |

34H (Charge = 1, Multiplicity = 1):

|   |             |             |             |
|---|-------------|-------------|-------------|
| C | -7.12095500 | -0.89686900 | -0.39634400 |
| C | -6.27689700 | -1.98125000 | -0.71562000 |
| C | -4.91397700 | -1.94357600 | -0.47405900 |
| C | -4.42300400 | -0.77202500 | 0.10330600  |
| C | -5.26049700 | 0.30352100  | 0.42083300  |
| C | -6.63384100 | 0.26558600  | 0.17710800  |
| N | -3.14449700 | -0.38471600 | 0.47910800  |
| C | -3.18672400 | 0.83882400  | 0.99132300  |
| N | -4.43902100 | 1.27770200  | 0.97036300  |
| H | -8.18186100 | -0.97750500 | -0.60677000 |
| H | -6.70951100 | -2.86919300 | -1.16357200 |
| H | -4.25825200 | -2.77173400 | -0.71629900 |
| H | -7.27482500 | 1.10342300  | 0.42543700  |
| H | -2.29724900 | -0.93694100 | 0.38373700  |
| H | -2.33724200 | 1.38964500  | 1.36623200  |
| H | -4.73192100 | 2.18929600  | 1.30980300  |

35H (Charge = 1, Multiplicity = 1):

|   |             |             |             |
|---|-------------|-------------|-------------|
| C | -7.13365600 | -1.06417400 | -0.75584500 |
| C | -6.27963600 | -2.14793900 | -1.04688800 |
| C | -4.92711000 | -2.11559000 | -0.74593900 |
| C | -4.45939000 | -0.95007600 | -0.13856200 |
| C | -5.30666000 | 0.12448400  | 0.15097400  |
| C | -6.66792800 | 0.09325700  | -0.15226200 |
| N | -3.19246500 | -0.57975400 | 0.29222300  |
| C | -3.26950200 | 0.64260200  | 0.81069400  |
| N | -4.51692000 | 1.09950700  | 0.74577300  |
| C | -4.98697400 | 2.39804000  | 1.21571000  |
| C | -1.99077800 | -1.40042100 | 0.18991400  |
| H | -8.18484000 | -1.14024200 | -1.01199100 |
| H | -6.69481900 | -3.03127000 | -1.51983700 |
| H | -4.26528200 | -2.94535500 | -0.96759700 |
| H | -7.31927100 | 0.92995100  | 0.07456200  |
| H | -2.43425500 | 1.18790500  | 1.22775500  |
| H | -5.39763200 | 2.95558200  | 0.37304000  |
| H | -5.75560200 | 2.24620600  | 1.97436500  |
| H | -4.14276100 | 2.93595700  | 1.64361800  |
| H | -1.15754800 | -0.84619300 | 0.61839800  |
| H | -2.14540000 | -2.32863600 | 0.74137500  |
| H | -1.79506800 | -1.61716900 | -0.86094400 |

36H (Charge = 1, Multiplicity = 1):

|   |             |             |             |
|---|-------------|-------------|-------------|
| C | -4.82414600 | -0.03563400 | 0.59156800  |
| C | -4.69191300 | 0.09399400  | -0.83430700 |
| C | -3.44307900 | -0.09952100 | -1.46402400 |



|   |             |             |             |
|---|-------------|-------------|-------------|
| C | -2.37872300 | -0.41337900 | -0.65503700 |
| C | -2.50888400 | -0.54136100 | 0.74991800  |
| C | -3.70815300 | -0.35932700 | 1.39397700  |
| N | -1.03697200 | -0.66534500 | -0.93313900 |
| C | -0.39368100 | -0.92631500 | 0.19603700  |
| N | -1.23610900 | -0.86229500 | 1.21741600  |
| C | -6.10764300 | 0.16852000  | 1.18192400  |
| C | -7.19208700 | 0.48114900  | 0.41110700  |
| C | -7.06110100 | 0.60969700  | -1.00012600 |
| C | -5.84913800 | 0.42189400  | -1.60319800 |
| H | -3.33836600 | -0.00201300 | -2.53923900 |
| H | -3.80387200 | -0.45865700 | 2.46984600  |
| H | -0.60303400 | -0.65664200 | -1.85142800 |
| H | 0.65871600  | -1.15736400 | 0.27234000  |
| H | -0.97562600 | -1.02003300 | 2.18625500  |
| H | -6.19993200 | 0.06830600  | 2.25953100  |
| H | -8.16216200 | 0.63326500  | 0.87328100  |
| H | -7.93307700 | 0.85826100  | -1.59647100 |
| H | -5.74104700 | 0.51804200  | -2.67970400 |

37H (Charge = 1, Multiplicity = 1):

|   |             |             |             |
|---|-------------|-------------|-------------|
| C | -2.41076900 | 0.26755500  | -1.58558200 |
| C | -2.38654200 | 1.50427900  | -0.91416200 |
| C | -3.20542400 | 1.75554000  | 0.17441300  |
| C | -4.06012400 | 0.72882900  | 0.58135400  |
| C | -4.07903700 | -0.49872300 | -0.08923600 |
| C | -3.25419200 | -0.75320400 | -1.18650900 |
| S | -5.21071600 | 0.71506500  | 1.89866900  |
| C | -5.65489900 | -0.87790400 | 1.51416000  |
| N | -5.00221200 | -1.36336500 | 0.48831100  |
| H | -1.75377900 | 0.11158000  | -2.43396300 |
| H | -1.71101100 | 2.28041600  | -1.25668600 |
| H | -3.18518700 | 2.70834700  | 0.69092800  |
| H | -3.28600900 | -1.71176300 | -1.69192300 |
| H | -6.40269900 | -1.44623400 | 2.05463000  |
| H | -5.16457800 | -2.31156000 | 0.14553400  |

38H (Charge = 1, Multiplicity = 1):

|   |             |             |             |
|---|-------------|-------------|-------------|
| C | -2.47045900 | 0.38845500  | -1.78043200 |
| C | -2.34549300 | 1.70107800  | -1.29212000 |
| C | -3.06016600 | 2.13293500  | -0.18633000 |
| C | -3.91117300 | 1.21142400  | 0.42573200  |
| C | -4.03268000 | -0.09292000 | -0.06256600 |
| C | -3.31316000 | -0.52898600 | -1.17703400 |
| S | -4.94068900 | 1.43141200  | 1.82081400  |
| C | -5.46943000 | -0.18053400 | 1.69168900  |
| N | -4.93482700 | -0.84386300 | 0.69734700  |
| C | -5.24164400 | -2.24496700 | 0.38652600  |
| H | -1.89488800 | 0.08740100  | -2.64868600 |
| H | -1.67490200 | 2.39211400  | -1.79103800 |
| H | -2.96458300 | 3.14515200  | 0.18988800  |
| H | -3.41346100 | -1.54284000 | -1.54782300 |
| H | -6.18741700 | -0.63009000 | 2.36858900  |

|   |             |             |             |
|---|-------------|-------------|-------------|
| H | -5.65601200 | -2.29109400 | -0.62100600 |
| H | -4.31723500 | -2.82054700 | 0.44283600  |
| H | -5.96355100 | -2.61107900 | 1.11302200  |

39H (Charge = 1, Multiplicity = 1):

|   |             |             |             |
|---|-------------|-------------|-------------|
| C | -1.98364900 | -0.39062900 | 0.31207500  |
| C | -2.55012600 | -1.67918100 | 0.27880600  |
| C | -3.87846800 | -1.89527800 | -0.06809900 |
| C | -4.59052200 | -0.74886300 | -0.37505600 |
| C | -4.04415000 | 0.52698900  | -0.34632500 |
| C | -2.71518000 | 0.74706700  | 0.00027200  |
| O | -5.91505700 | -0.63859900 | -0.75301700 |
| C | -6.15570800 | 0.63651300  | -0.94279400 |
| N | -5.09658500 | 1.36714400  | -0.71864800 |
| H | -0.94118300 | -0.28447800 | 0.59084600  |
| H | -1.92986400 | -2.53161900 | 0.53251100  |
| H | -4.32881600 | -2.87981300 | -0.09820800 |
| H | -2.28815800 | 1.74220800  | 0.02315500  |
| H | -7.13557500 | 0.97944300  | -1.24769600 |
| H | -5.06703200 | 2.38185800  | -0.81355400 |

40H (Charge = 1, Multiplicity = 1):

|   |             |             |             |
|---|-------------|-------------|-------------|
| C | -1.97628400 | -0.85877200 | 0.53040200  |
| C | -2.54233000 | -2.14644800 | 0.47899900  |
| C | -3.85561400 | -2.36350200 | 0.07698800  |
| C | -4.55382600 | -1.21872700 | -0.26500900 |
| C | -4.00726900 | 0.05534900  | -0.21856200 |
| C | -2.69446200 | 0.27791600  | 0.18232700  |
| O | -5.85957000 | -1.10598400 | -0.69609600 |
| C | -6.08210200 | 0.17479600  | -0.89746900 |
| N | -5.03541000 | 0.91042300  | -0.63553100 |
| C | -4.94475300 | 2.36561900  | -0.75436200 |
| H | -0.94647500 | -0.75201300 | 0.85255000  |
| H | -1.93438800 | -2.99843500 | 0.76249300  |
| H | -4.30436300 | -3.34830300 | 0.03340900  |
| H | -2.26711500 | 1.27318600  | 0.21890700  |
| H | -7.04694900 | 0.52233000  | -1.24344800 |
| H | -4.70439900 | 2.77560100  | 0.22645700  |
| H | -4.15842700 | 2.60307400  | -1.47052100 |
| H | -5.90578200 | 2.74061000  | -1.10095900 |

41H (Charge = 1, Multiplicity = 1):

|   |             |             |             |
|---|-------------|-------------|-------------|
| C | -5.29601800 | -2.28924800 | 0.24001600  |
| C | -6.69223700 | -2.11060700 | 0.09264200  |
| C | -7.24703800 | -0.85981100 | -0.02163400 |
| C | -6.42680200 | 0.30141500  | 0.00622300  |
| C | -5.02993000 | 0.12885400  | 0.15318800  |
| C | -4.49272500 | -1.17926400 | 0.26700300  |
| C | -6.93083700 | 1.62640000  | -0.10475100 |
| C | -6.07989000 | 2.70343900  | -0.06902200 |
| C | -4.68205400 | 2.53680400  | 0.07756200  |
| C | -4.18171600 | 1.26556200  | 0.18501600  |
| N | -2.80143100 | 1.00858400  | 0.33355500  |

|   |             |             |             |
|---|-------------|-------------|-------------|
| C | -2.31088400 | -0.20735900 | 0.43784100  |
| N | -3.09061600 | -1.26614500 | 0.40844500  |
| H | -4.86389800 | -3.28040000 | 0.32922100  |
| H | -7.32886200 | -2.98877000 | 0.07061900  |
| H | -8.31965000 | -0.73793800 | -0.13490900 |
| H | -8.00078200 | 1.76974600  | -0.21822400 |
| H | -6.47695700 | 3.70936700  | -0.15456600 |
| H | -4.01557900 | 3.39250100  | 0.10417500  |
| H | -1.24206100 | -0.33971800 | 0.55098000  |
| H | -2.15405400 | 1.79195000  | 0.36440400  |
| H | -2.65913300 | -2.18307500 | 0.49088700  |

42H (Charge = 1, Multiplicity = 1):

|   |             |             |             |
|---|-------------|-------------|-------------|
| C | -5.29361900 | -2.28831800 | 0.23418300  |
| C | -6.68722900 | -2.10719900 | 0.07380700  |
| C | -7.23743300 | -0.85643000 | -0.03992300 |
| C | -6.41276100 | 0.29961100  | 0.00162000  |
| C | -5.01462200 | 0.12914500  | 0.16168900  |
| C | -4.47959500 | -1.18166300 | 0.27565100  |
| C | -6.92713000 | 1.61904900  | -0.11012600 |
| C | -6.08434600 | 2.69959200  | -0.06344200 |
| C | -4.68778500 | 2.54032900  | 0.09514400  |
| C | -4.17109300 | 1.27130100  | 0.20454900  |
| N | -2.78399100 | 1.02965500  | 0.36397400  |
| C | -2.31988100 | -0.20063200 | 0.46596700  |
| N | -3.07528500 | -1.28100000 | 0.43110200  |
| C | -2.45946800 | -2.60519700 | 0.54953000  |
| C | -1.86054500 | 2.16646000  | 0.41506000  |
| H | -4.88820300 | -3.28829800 | 0.32107700  |
| H | -7.32308900 | -2.98559700 | 0.04172300  |
| H | -8.30820100 | -0.72830800 | -0.16330200 |
| H | -7.99728900 | 1.75265800  | -0.23305300 |
| H | -6.48410800 | 3.70440100  | -0.14950100 |
| H | -4.04872300 | 3.41359000  | 0.12655700  |
| H | -1.25052700 | -0.33399100 | 0.58428000  |
| H | -2.87117300 | -3.11505600 | 1.42216600  |
| H | -2.67207100 | -3.18083400 | -0.35301600 |
| H | -1.38473000 | -2.48303500 | 0.66635700  |
| H | -0.84540400 | 1.79315900  | 0.53656000  |
| H | -1.93791800 | 2.73213300  | -0.51500900 |
| H | -2.12389700 | 2.80344800  | 1.26123900  |

43H (Charge = 1, Multiplicity = 1):

|   |             |             |             |
|---|-------------|-------------|-------------|
| C | -4.93064300 | -0.57087200 | 0.28116400  |
| C | -3.77345900 | -1.06584300 | -0.34992000 |
| N | -3.66327400 | -2.39421500 | -0.48045600 |
| C | -4.57460700 | -3.36340800 | -0.05680400 |
| N | -5.68597700 | -2.80112000 | 0.56039400  |
| C | -5.86321100 | -1.49316100 | 0.72122100  |
| C | -2.65311100 | -0.24988200 | -0.89097200 |
| O | -4.40977400 | -4.54472400 | -0.21247900 |
| C | -5.26859900 | 0.85994500  | 0.53193300  |
| O | -6.30717500 | 1.19096200  | 1.05804700  |

|   |             |             |             |
|---|-------------|-------------|-------------|
| O | -4.32762800 | 1.69945900  | 0.12648900  |
| C | -3.38816000 | 3.86620900  | -0.15109400 |
| C | -4.59327500 | 3.10606200  | 0.34631400  |
| H | -2.83336400 | -2.77205900 | -0.93937500 |
| H | -6.39303500 | -3.45335800 | 0.89843600  |
| H | -6.77521900 | -1.17903200 | 1.21826600  |
| H | -3.04023500 | 0.45134500  | -1.63331500 |
| H | -2.21530100 | 0.34154700  | -0.08346200 |
| H | -1.89296600 | -0.88909200 | -1.34000300 |
| H | -3.55158400 | 4.93635000  | -0.00336200 |
| H | -2.49084800 | 3.57317900  | 0.39977800  |
| H | -3.22606400 | 3.68371700  | -1.21636300 |
| H | -5.50421600 | 3.37096800  | -0.19649100 |
| H | -4.76783800 | 3.25899900  | 1.41419400  |

44H (Charge = 1, Multiplicity = 1):

|   |             |             |             |
|---|-------------|-------------|-------------|
| C | -2.72333400 | -0.34778800 | -0.23664700 |
| C | -3.20938500 | 0.92034000  | 0.08250100  |
| N | -4.55438000 | 1.04992700  | 0.09012600  |
| C | -5.40210800 | 0.02980500  | -0.18832900 |
| N | -4.97659700 | -1.17834400 | -0.49604900 |
| C | -3.65760300 | -1.34978200 | -0.51702800 |
| C | -2.42369300 | 2.14083900  | 0.41557000  |
| C | -1.28323600 | -0.74200600 | -0.30541100 |
| O | -0.93790100 | -1.86952000 | -0.57477400 |
| O | -0.45500200 | 0.25858900  | -0.04383400 |
| C | 1.70485000  | 1.20881100  | 0.25164600  |
| C | 0.95756000  | -0.05674500 | -0.09114600 |
| O | -6.66150400 | 0.34988500  | -0.12372100 |
| C | -7.63043300 | -0.68485000 | -0.41773300 |
| H | -4.96328500 | 1.95949700  | 0.31353900  |
| H | -3.29789800 | -2.34342000 | -0.76928800 |
| H | -1.79594000 | 1.94362700  | 1.28713900  |
| H | -1.76104900 | 2.38775500  | -0.41645800 |
| H | -3.08918900 | 2.97956400  | 0.62135800  |
| H | 2.77902400  | 1.01072100  | 0.22675300  |
| H | 1.48104500  | 1.99925400  | -0.46910600 |
| H | 1.43956800  | 1.55632900  | 1.25329600  |
| H | 1.15339800  | -0.86007000 | 0.62342800  |
| H | 1.19368400  | -0.41929000 | -1.09485200 |
| H | -8.59550100 | -0.19764000 | -0.30518200 |
| H | -7.48831500 | -1.04030800 | -1.43838800 |
| H | -7.52054600 | -1.50350600 | 0.29348100  |

45H (Charge = 1, Multiplicity = 1):

|   |             |             |             |
|---|-------------|-------------|-------------|
| C | -4.82219600 | -0.51616500 | 0.49342900  |
| C | -3.69130800 | -1.04330800 | -0.15635800 |
| N | -3.60489900 | -2.37939600 | -0.25437400 |
| C | -4.50837300 | -3.31432000 | 0.20977200  |
| N | -5.58687000 | -2.73102700 | 0.83300700  |
| C | -5.75176700 | -1.41777800 | 0.97770700  |
| S | -4.31311900 | -4.93797400 | 0.03348000  |
| C | -2.57496200 | -0.26128100 | -0.74965000 |

|   |             |             |             |
|---|-------------|-------------|-------------|
| C | -5.13272900 | 0.92645300  | 0.72238100  |
| O | -6.11909500 | 1.27746400  | 1.32832800  |
| O | -4.23420700 | 1.74268200  | 0.19637100  |
| C | -3.37007600 | 3.89249700  | -0.33977200 |
| C | -4.47831500 | 3.15995500  | 0.37587600  |
| H | -2.78642900 | -2.76804000 | -0.72508900 |
| H | -6.29922100 | -3.36104700 | 1.20171600  |
| H | -6.64856900 | -1.09146000 | 1.49429400  |
| H | -2.97092800 | 0.39938400  | -1.52460500 |
| H | -2.12744000 | 0.37164900  | 0.01988200  |
| H | -1.82152100 | -0.92507000 | -1.17324700 |
| H | -3.51911500 | 4.96886000  | -0.22621300 |
| H | -2.39592000 | 3.63087600  | 0.08077400  |
| H | -3.37282000 | 3.65257000  | -1.40597900 |
| H | -5.46287300 | 3.39219300  | -0.03720500 |
| H | -4.49122200 | 3.37065700  | 1.44828400  |

46H (Charge = 1, Multiplicity = 1):

|   |             |             |             |
|---|-------------|-------------|-------------|
| C | -5.68791100 | -3.52538900 | 0.64768600  |
| C | -5.98340400 | -3.14235900 | 1.97957800  |
| C | -6.19353200 | -1.82513100 | 2.32932000  |
| C | -6.10612100 | -0.85988100 | 1.32339000  |
| C | -5.81314600 | -1.20764800 | -0.01978000 |
| C | -5.60393600 | -2.57831900 | -0.33781100 |
| O | -6.31007000 | 0.42033300  | 1.67240300  |
| C | -6.24956800 | 1.41608800  | 0.77376500  |
| C | -5.96249900 | 1.14729900  | -0.58880000 |
| C | -5.74529100 | -0.18134300 | -0.96696200 |
| C | -6.47973500 | 2.71511800  | 1.23314800  |
| C | -6.42138200 | 3.74353500  | 0.31630200  |
| C | -6.13802100 | 3.51116600  | -1.05250700 |
| C | -5.91165700 | 2.23747900  | -1.50144600 |
| H | -5.53010200 | -4.57266200 | 0.41756200  |
| H | -6.04695300 | -3.90668800 | 2.74724100  |
| H | -6.42019100 | -1.52390900 | 3.34534000  |
| H | -5.37972600 | -2.84027800 | -1.36669400 |
| H | -5.52291200 | -0.41782000 | -2.00520400 |
| H | -6.69517400 | 2.88437000  | 2.28175900  |
| H | -6.59740000 | 4.75963500  | 0.65379800  |
| H | -6.10261700 | 4.34949900  | -1.73858600 |
| H | -5.69191500 | 2.02807700  | -2.54327000 |

47H (Charge = 1, Multiplicity = 1):

|   |             |             |             |
|---|-------------|-------------|-------------|
| C | -7.39764000 | 0.03477500  | 0.69964700  |
| C | -7.34191400 | 1.41674700  | 0.40904800  |
| C | -6.14198000 | 2.05782200  | 0.18388300  |
| C | -4.94699500 | 1.32160100  | 0.24495800  |
| C | -4.97811200 | -0.07196800 | 0.53689700  |
| C | -6.24069500 | -0.69445000 | 0.76170800  |
| S | -3.48161700 | 2.18089700  | -0.04819200 |
| C | -2.23755200 | 0.99811000  | 0.10648200  |
| C | -2.50521500 | -0.36594700 | 0.41511700  |
| C | -3.80894800 | -0.84020100 | 0.60977800  |

|   |             |             |             |
|---|-------------|-------------|-------------|
| C | -0.91563700 | 1.43292300  | -0.08617300 |
| C | 0.11662500  | 0.52588500  | 0.02884500  |
| C | -0.12451700 | -0.83227800 | 0.33644200  |
| C | -1.40804300 | -1.26931000 | 0.52514900  |
| H | -8.35657200 | -0.44019900 | 0.87220900  |
| H | -8.26204000 | 1.98978900  | 0.36137600  |
| H | -6.11824300 | 3.11988000  | -0.03810000 |
| H | -6.25333700 | -1.75658100 | 0.98449000  |
| H | -3.92226900 | -1.89848500 | 0.83780200  |
| H | -0.71179000 | 2.47237300  | -0.32221500 |
| H | 1.13603300  | 0.86637000  | -0.12043200 |
| H | 0.70854400  | -1.52062300 | 0.42058900  |
| H | -1.62394600 | -2.30631600 | 0.76205900  |

## Electron spin density of transition states

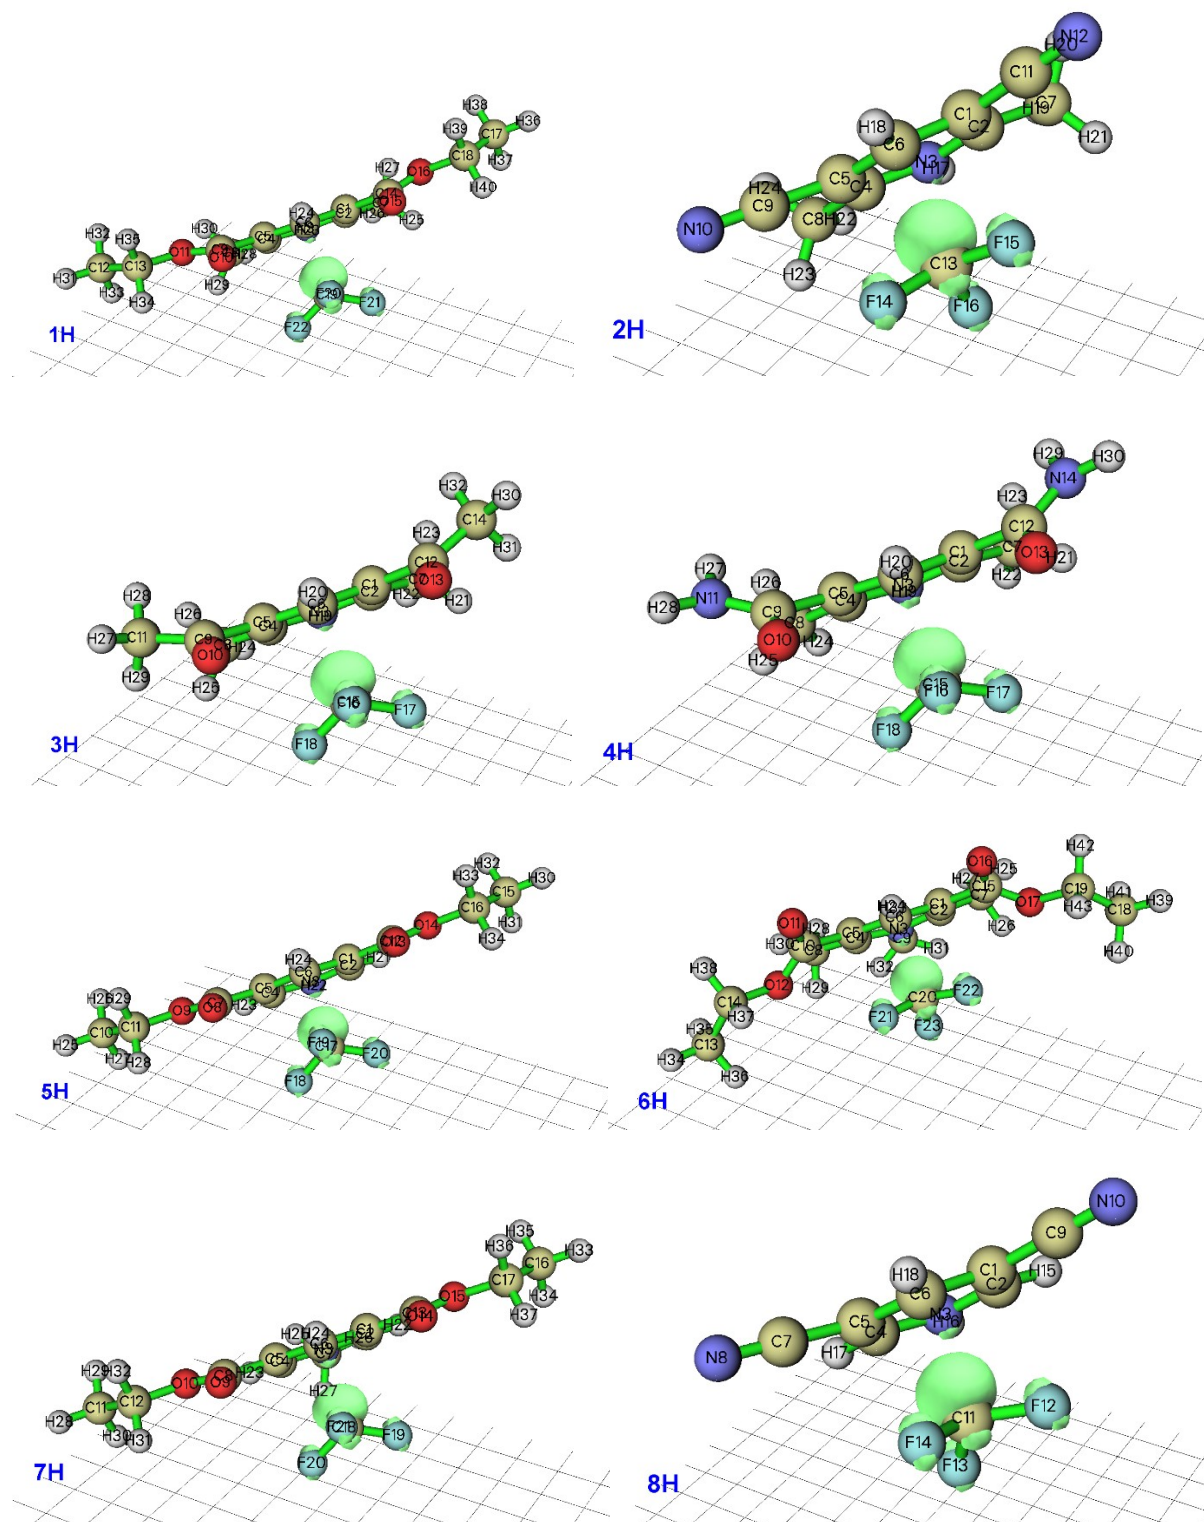

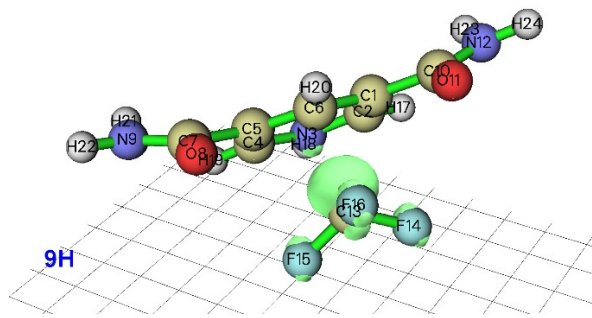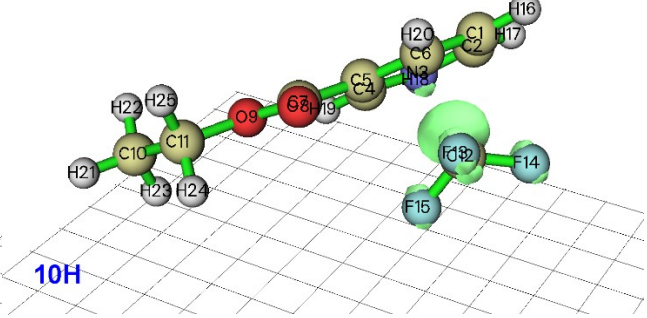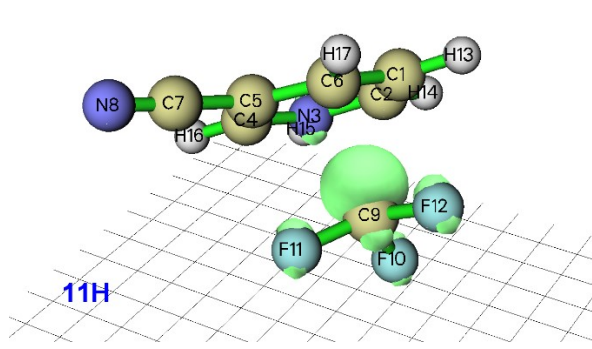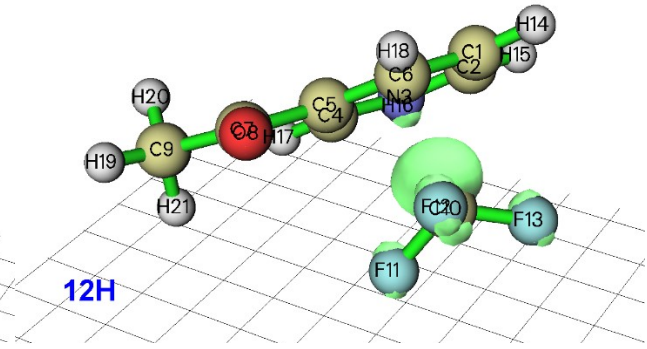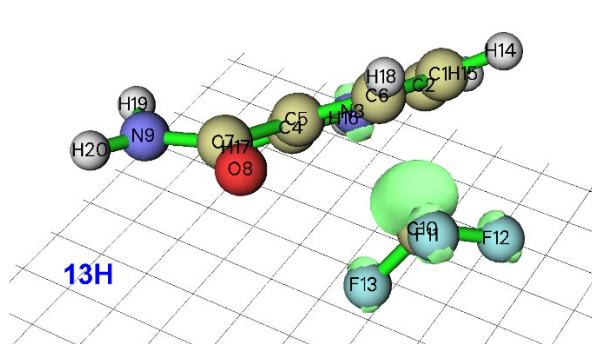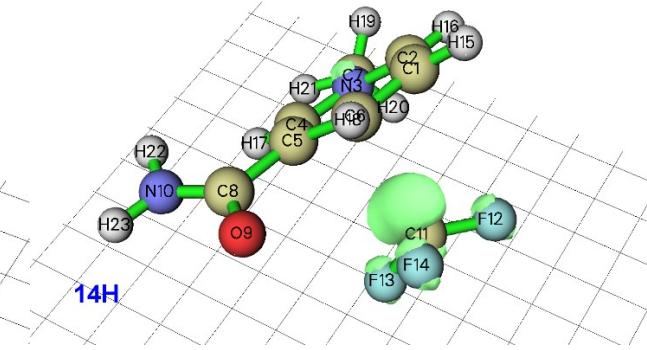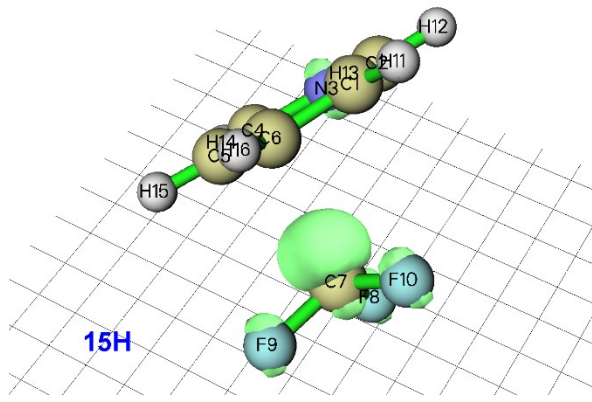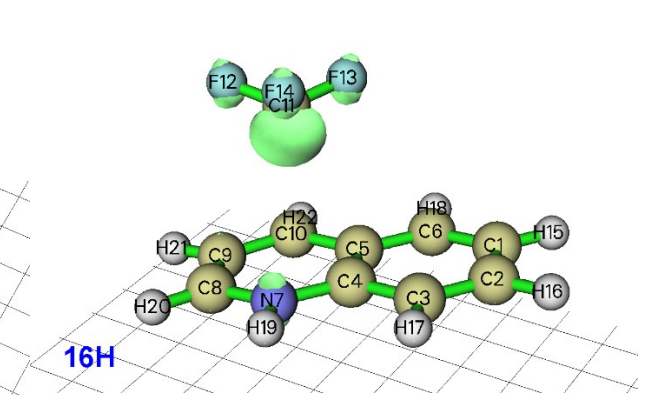



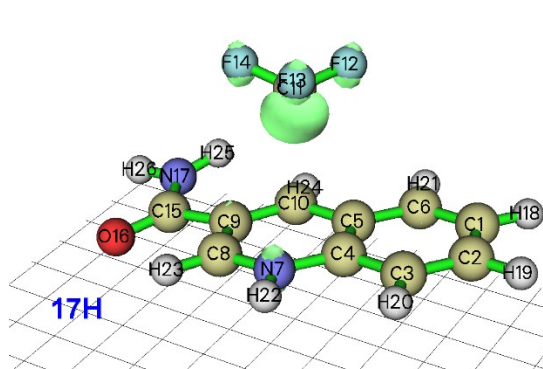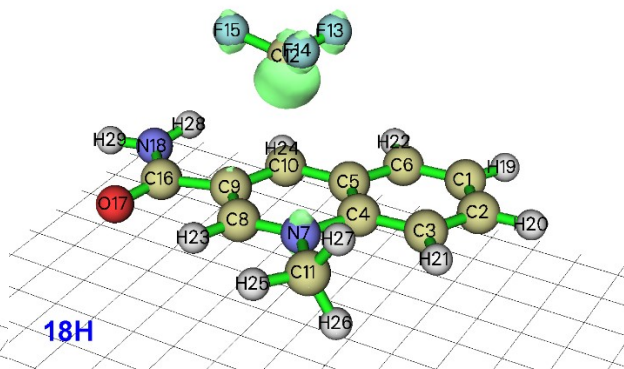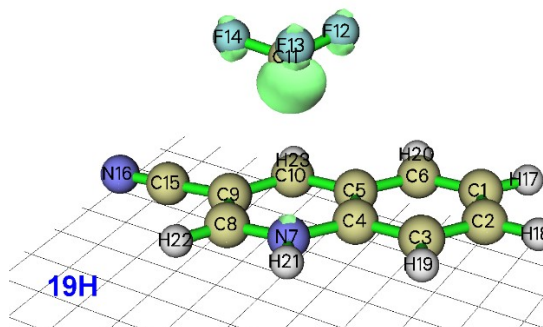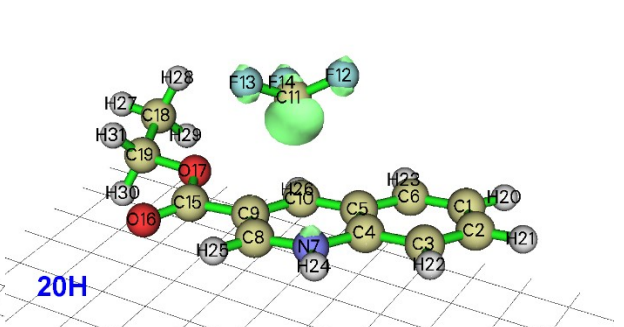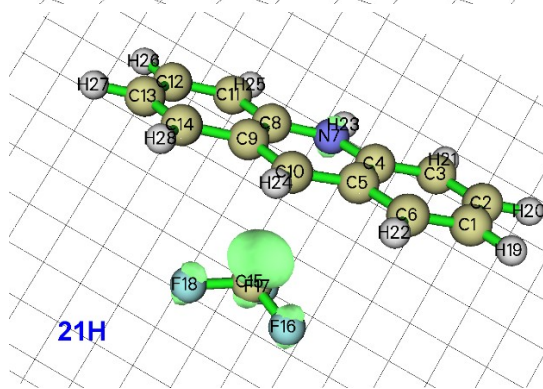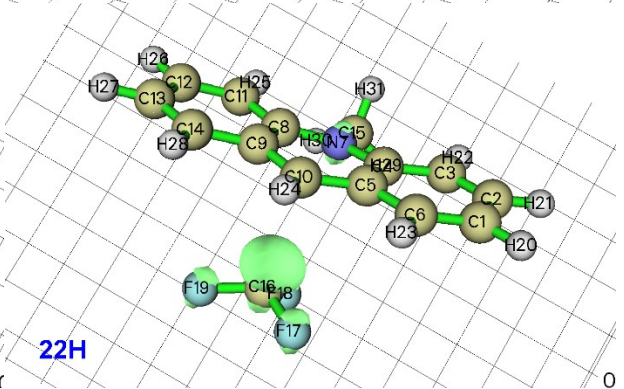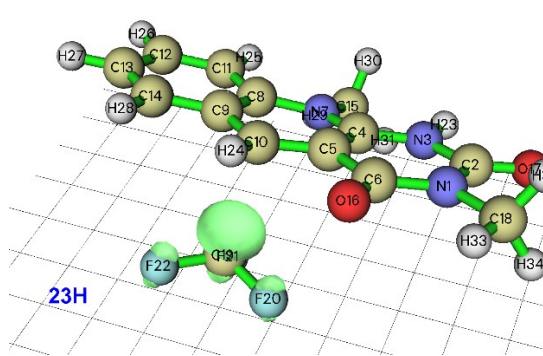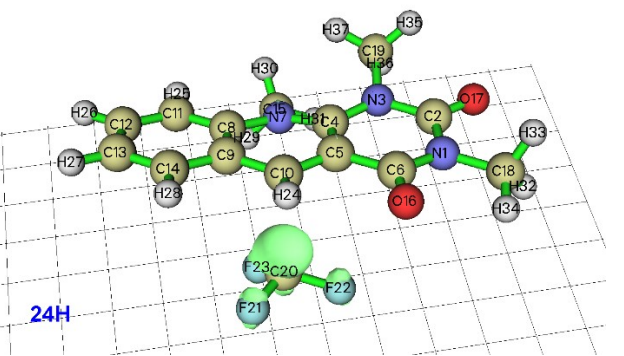

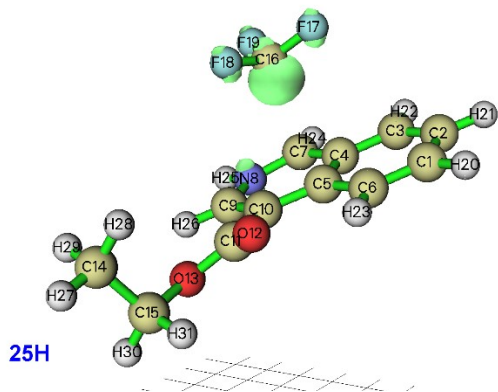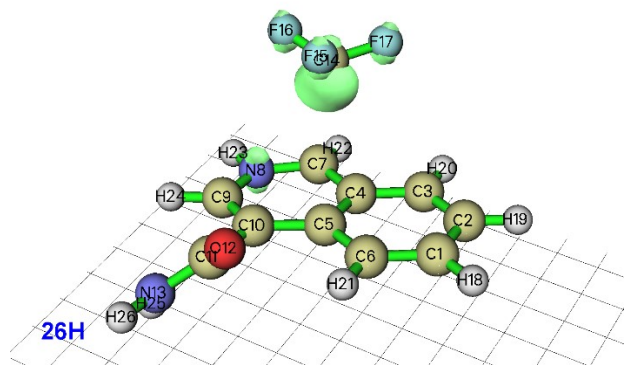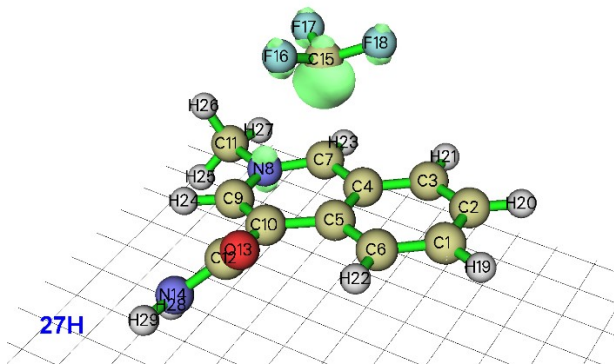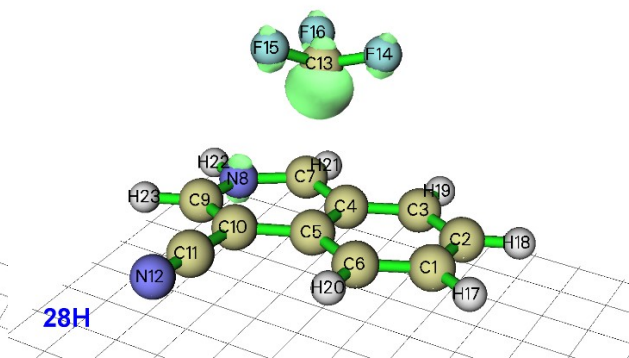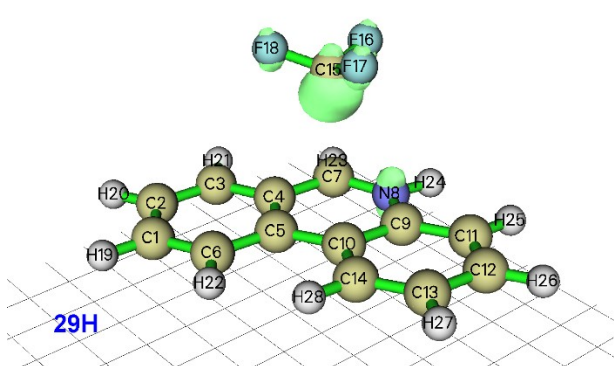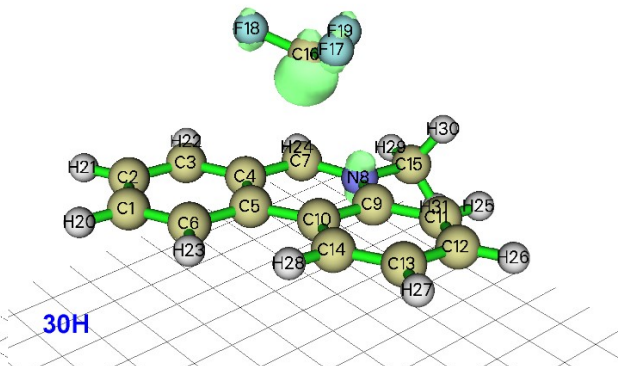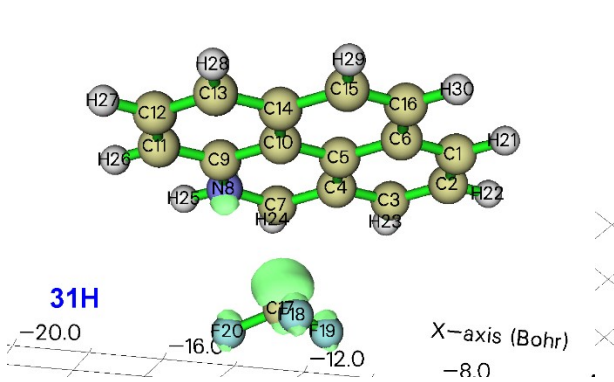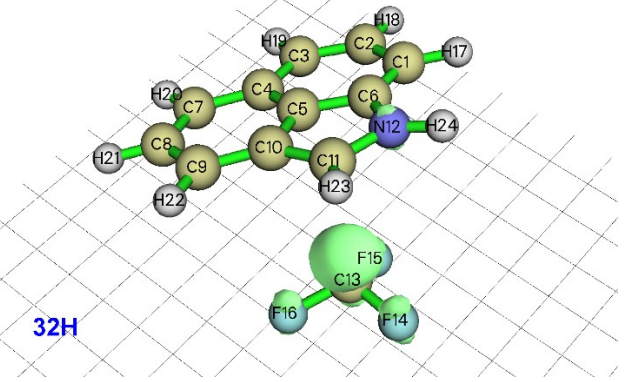

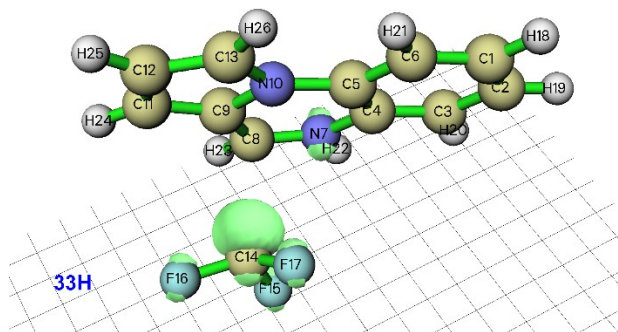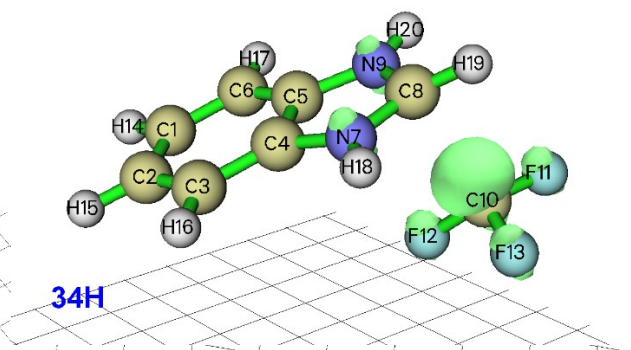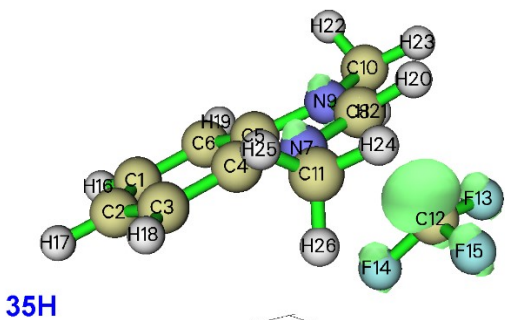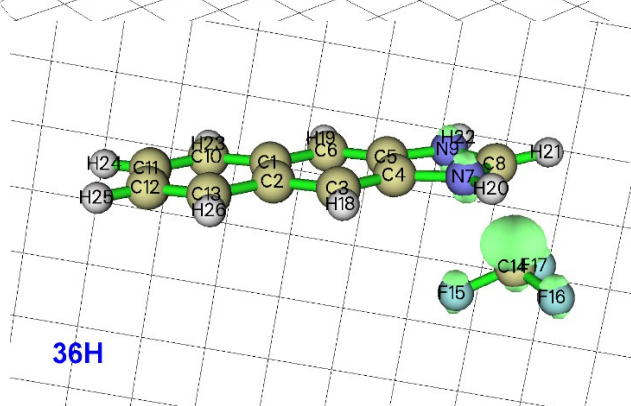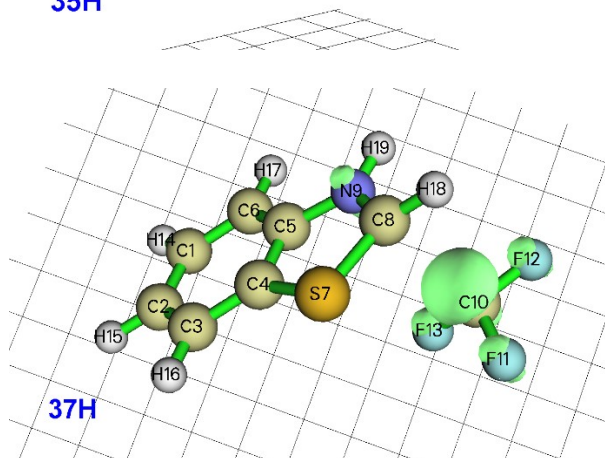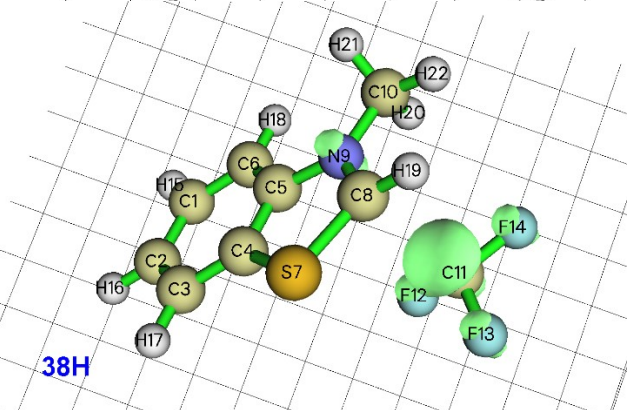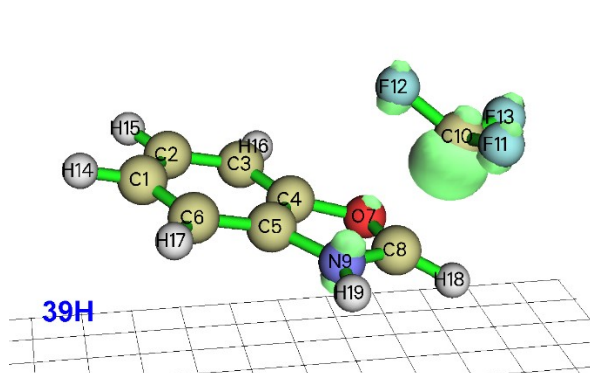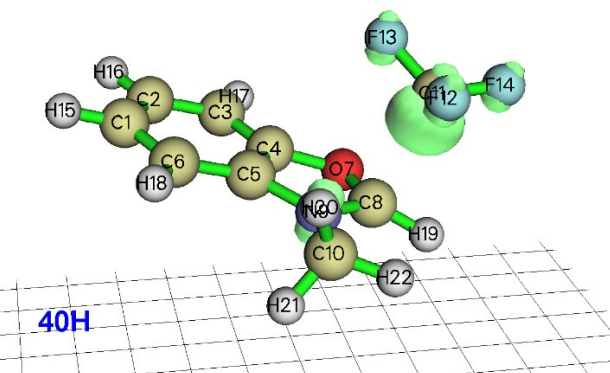

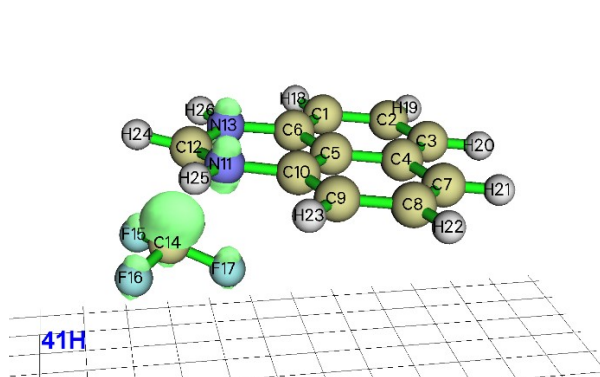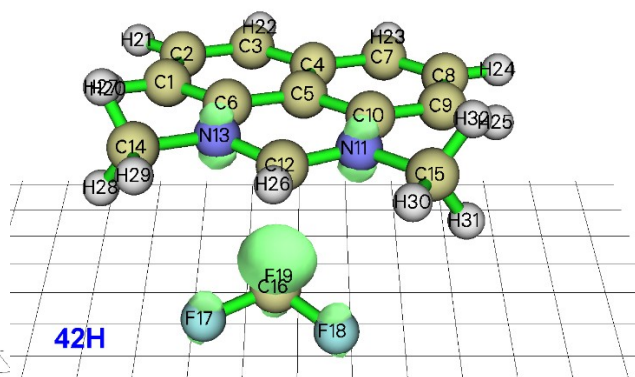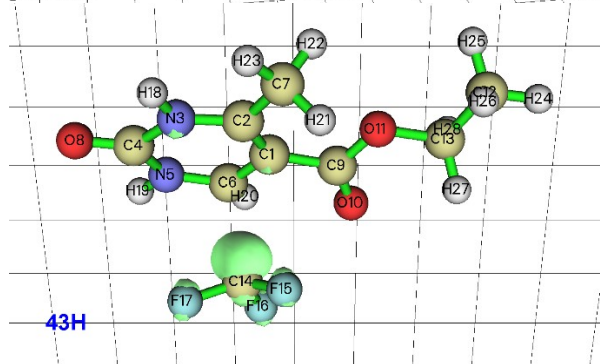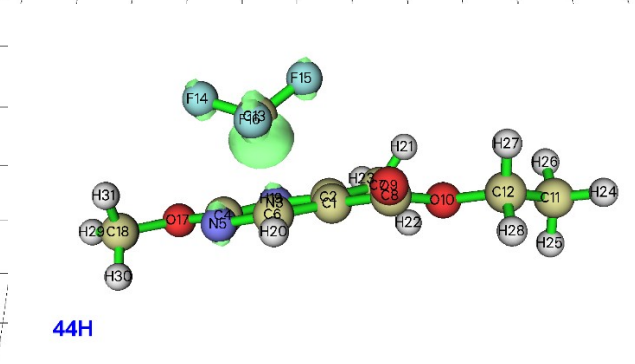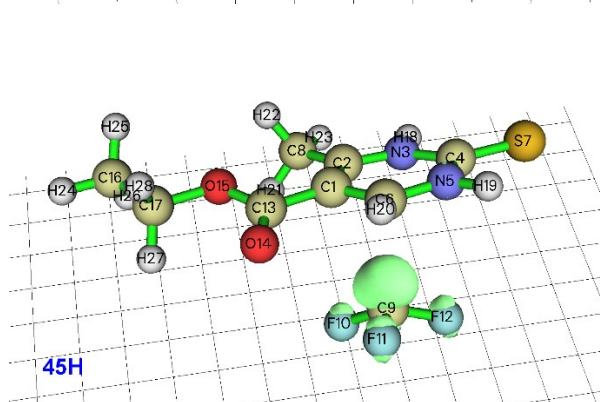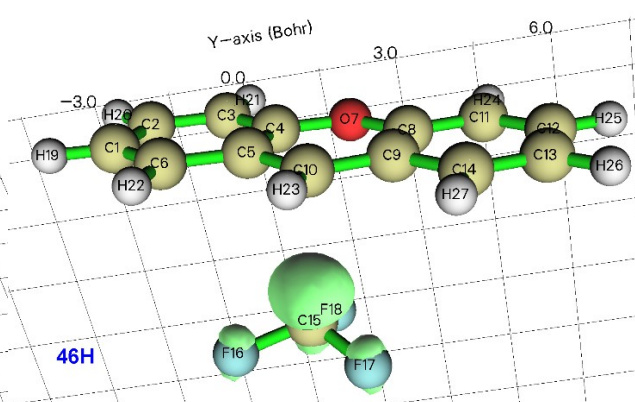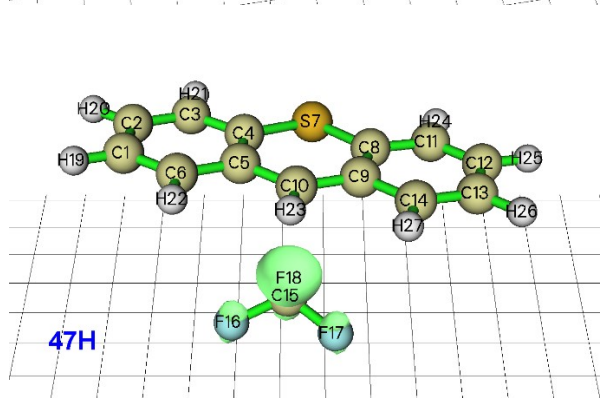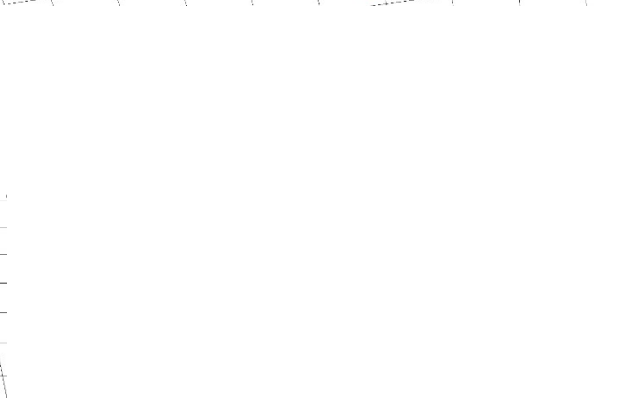

Supplement: d2ob00056c1.pdf [file d2ob00056c1.pdf]
